# Comparative effectiveness of different primary vaccination courses on mRNA based booster vaccines against SARs-COV-2 infections: A time-varying cohort analysis using trial emulation in the Virus Watch community cohort

## Authors

Vincent Grigori Nguyen, Alexei Yavlinsky, Sarah Beale, Susan Hoskins, Vasileios Lampos, Isobel Braithwaite, Thomas E Byrne, Wing Lam Erica Fong, Ellen Fragaszy, Cyril Geismar, Jana Kovar, Annalan M D Navaratnam, Parth Patel, Madhumita Shrotri, Sophie Weber, Andrew C Hayward, Robert W Aldridge\* on behalf of the Virus Watch Collaborative\*\*

## Affiliations

Institute of Health Informatics, University College London, UK (VGN, AY, SB, IB, TEB, WLEF, CG, AMDN, PP, MS); Institute of Epidemiology and Health Care, University College London, London, UK (VGN, SB, SH, TEB, CG, JK, SW, ACH); Department of Computer Science, University College London, London, UK (VL); Department of Infectious Disease Epidemiology, London School of Hygiene and Tropical Medicine, Keppel Street, London, UK (EF).

\*Correspondence to: Prof Robert W Aldridge, [r.aldridge@ucl.ac.uk](mailto:r.aldridge@ucl.ac.uk)

\*\*Virus Watch Collaborative:

Susan Michie, Pia Hardelid, Linda Wijlaars, Eleni Nastouli, Moira Spyer, Ben Killingley, Ingemar Cox, Rachel A McKendry, Tao Cheng, Yunzhe Liu, Jo Gibbs, Richard Gilson, Jamie Lopez Bernal, Anne M Johnson, Alison Rodger,

Centre for Behaviour Change, University College London, London, UK (SM); Department of Population, Policy and Practice, UCL Great Ormond Street Institute of Child Health, London, UK (VGN, PH, LW, EN, MS, BK); Francis Crick Institute, London, UK (EN, MS); Health Protection and Influenza Research Group, Division of Epidemiology and Public Health, University of Nottingham School of Medicine, Nottingham, UK (BK); Department of Computer Science, University College London, London, UK (IC); University College London Hospital, London, UK (BK); London Centre for Nanotechnology and Division of Medicine, London, University College London (RM); SpaceTimeLab, Department of Civil, Environmental and Geomatic Engineering, University College London, London, UK (TC, YL); Institute for Global Health, University College London, London, UK (JG, RG). Institute for Global Health, University College London, London, UK (AMJ, AR).

# Abstract

## Importance

The Omicron (B.1.1.529) variant has increased SARs-CoV-2 infections in double vaccinated individuals globally, particularly in ChAdOx1 recipients. To tackle rising infections, the UK accelerated booster vaccination programmes used mRNA vaccines irrespective of an individual's primary course vaccine type with booster doses rolled out according to clinical priority. There is limited understanding of the effectiveness of different primary vaccination courses on mRNA based booster vaccines against SARs-COV-2 infections and how time-varying confounders can impact the evaluations comparing different vaccines as primary courses for mRNA boosters.

## Objective

To evaluate the comparative effectiveness of ChAdOx1 versus BNT162b2 as primary doses against SARs-CoV-2 in booster vaccine recipients whilst accounting for time-varying confounders.

## Design

Trial emulation was used to reduce time-varying confounding-by-indication driven by prioritising booster vaccines based upon age, vulnerability and exposure status e.g. healthcare worker. Trial emulation was conducted by meta-analysing eight cohort results whose booster vaccinations were staggered between 16/09/2021 to 05/01/2022 and followed until 23/01/2022. Time from booster vaccination until SARS-CoV-2 infection, loss of follow-up or end-of-study was modelled using Cox proportional hazards models for each cohort and adjusted for age, sex, minority ethnic status, clinically vulnerability, and deprivation.

## Setting

Prospective observational study using the Virus Watch community cohort in England and Wales.

## Participants

People over the age of 18 years who had their booster vaccination between 16/09/2021 to 05/01/2022 without prior natural immunity.

## Exposures

ChAdOx1 versus BNT162b2 as a primary dose, and an mRNA booster vaccine.

## Results

Across eight cohorts, 19,692 mRNA vaccine boosted participants were analysed with 12,036 ChAdOx1 and 7,656 BNT162b2 primary courses with a median follow-up time of 73 days (IQR:54-90). Median age, clinical vulnerability status and infection rates fluctuate through time. 7.2% (n=864) of boosted adults with ChAdOx1 primary course experienced a SARS-CoV-2 infection compared to 7.6% (n=582) of those with BNT162b2 primary course during follow-up. The pooled adjusted hazard ratio was 0.99 [95%CI:0.88-1.11], demonstrating no difference between the incidence of SARS-CoV-2 infections based upon the primary vaccine course.

## Conclusion and Relevance

In mRNA boosted individuals, we found no difference in protection comparing those with a primary course of BNT162b2 to those with aChAdOx1 primary course. This contrasts with pre-booster findings where previous research shows greater effectiveness of BNT162b2 than ChAdOx1 in preventing infection.

## Introduction

England and Wales has recently experienced an increase in SARs-CoV-2 infections in individuals that received two vaccines. This increase in infection rates is partially attributable to waning vaccine protection and the emergence of the variant of concern, Omicron (B.1.1.529) which has mutations leading to partial immune escape from prior infection or vaccination. To tackle the growth in infections, the UK accelerated booster vaccines to those who received two doses of certified COVID-19 vaccinations with a gap of 3-months between the second and a third booster dose.

Our previous analysis found a difference in SARs-CoV-2 infection rates between the two dominant vaccines (ChAdOx1 or BNT162b2) in the United Kingdom with those receiving ChAdOx1 as their primary course having a 35% increased risk of having a SARs-CoV-2 infection 1.35 [HR: 1.35, 95%CI: 1.15 - 1.58] at up to 315 days post first vaccination <sup>1</sup>. Our findings are consistent with previous work which demonstrated the difference in peak Spike-antibody levels (the primary antibody stimulated by vaccination-related inoculation) based upon vaccine type; where BNT162b2 produced Spike-antibody levels an order of magnitude higher than ChAdOx1 after two doses <sup>2(p1)</sup>. Due to the difference in vaccine effectiveness in preventing SARs-CoV-2 infections and enhancing antibody levels, and data from recently conducted randomised controlled trials examining safety and immunogenicity of seven COVID-19 vaccines as a booster dose<sup>3</sup>, messenger ribonucleic acid (mRNA) based vaccines (BNT162b2 or mRNA-1273) were chosen as viable options for the booster dose in the UK to tackle further waves of infection <sup>3</sup>.

Following the use of BNT162b2 or mRNA-1273 as booster doses in the UK, research from the UK Health Security Agency (UKHSA) has demonstrated similar effectiveness between primary vaccine courses and mRNA boosters using test-negative study designs <sup>4</sup>. Test negative designs are well suited to reducing biases related to test seeking behaviour <sup>5</sup> but are subject to temporal confounding where timing of vaccination is influenced by risk factors for infection <sup>6</sup>. To protect the most vulnerable and exposed to SARs-CoV-2, the UK's strategy prioritised booster vaccination roll out based upon age, clinical vulnerability and exposure to the virus (for example, frontline healthcare workers). In addition to variation in timing of booster vaccinations according to risk factors, there are substantial variations in levels of infection and intensity of control measures over time which complicate the task of controlling for time varying confounding.

In this study, we aim to apply trial emulation techniques developed by Hernan and Robins <sup>7</sup> to tackle time-varying confounding by indication. Following Hernan et al's recommendations to overcome time varying confounding we use an eligibility criteria that removes those who are likely to have protection from SARs-COV-2 (e.g. through prior natural infection) and stagger our cohort based upon vaccination date. Staggering a single cohort into multiple cohorts aims to produce cohorts that are homogenous in terms of the eligibility criteria that had allowed them to

be vaccinated at that point in time. Using staggered cohorts also allows similar individuals to have similar followup periods and more importantly, experience the same COVID-19 public health policies and SARs-CoV-2 reproduction rates at the time of vaccination and throughout their followup period. This approach aims to control for the UK's booster prioritization list but could also mitigate the effects of unmeasured time varying confounders at the community level, for example, the introduction of new SARS-CoV-2 variants. Therefore, this approach appropriately accounts for "time zero" (start of followup) as it avoids comparisons between individuals who experienced different public health policies and SARs-CoV-2 reproduction rates through time.

In this study, our objective is to use a trial emulation approach to appropriately estimate the comparative effectiveness of receiving different primary vaccine courses (ChAdOx1 or BNT162b2) in addition to an mRNA booster vaccine against SARs-CoV-2 infections in a general population community cohort.

## Method

### Study Design and Setting

The study design used prospective observational data from the Virus Watch Cohort and applied a target trial emulation study design - a detailed description of the target trial emulation can be found in Table 1. The Virus Watch cohort has been described previously<sup>8</sup>. Briefly, households were recruited starting in mid-June 2020 via several methods aimed at creating a representative cohort of England and Wales, including postcards sent to the home address, social media, and SMS. As of January 2022, 58,634 individuals in 28,525 households had registered to take part. Participants completed weekly online surveys reporting symptoms, SARS-CoV-2 swab test results and vaccinations. From Autumn 2020, Virus Watch also included a programme of nasopharyngeal swab sample collection and blood collection via venipuncture or finger prick sampling in a subset of 10,000 participants in research clinics. From March 2021, blood samples were self-collected by participants using an at-home capillary blood sample collection kit, manufactured by the company Thriva [<https://thriva.co/>]. Completed kits were returned by participants using pre-paid envelopes and priority postage boxes to UKAS-accredited laboratories for serological testing using Roche's Elecsys Anti-SARS-CoV-2 assays targeting total immunoglobulin (Ig) to the Nucleocapsid (N) protein or to the receptor-binding domain in the S1 subunit of the Spike protein (S) (Roche Diagnostics, Basel, Switzerland).

### Participants

Participants from the Virus Watch cohort were eligible for the current analysis if they received a third (booster) COVID-19 vaccination recorded between September 16<sup>th</sup> 2021 and January 5<sup>th</sup>

2022. Participants must have had a primary COVID-19 vaccination dose recorded of either ChAdOx1 or BNT162b2. As the UK vaccination programme only included children under 18 years of age in the second half of 2021, participants under 18 years old were excluded from these analyses due to their low numbers. Participants who had evidence of SARS-CoV-2 infection prior to their booster vaccination were excluded to examine vaccine and not natural infection-related immunity. Previous SARS-CoV-2 infection was defined using the following: 1) A positive self-reported PCR or LFT test, 2) a positive PCR or LFT test from data linkage 3) presence of IgN through venous sampling or 4) the presence of the Spike antibody prior to December 2020 as these were likely due to natural infection or participation in a vaccination trial.

## Exposure Variables

The exposure variable was the vaccination type (ChAdOx1 or BNT162b2) of the primary vaccine course. Vaccination data in Virus Watch was combined from self-reported and linked data from the National Immunisation Management Service (*NIMS*) dataset.

In the January 11<sup>th</sup>, 2021 and January 18<sup>th</sup>, 2021 Virus Watch questionnaires, participants were asked about their vaccination status retrospectively. From 25 January 2021 onwards, participants were asked weekly for their vaccination status. Recorded vaccinations from NIMS covered the period October 9<sup>th</sup>, 2020, until December 23<sup>rd</sup> 2021.

## Outcome Variables

The primary outcome was SARS-CoV-2 infection using: 1) a positive self-reported PCR or LFT test or 2) a positive PCR or LFT test from the linked Second-Generation Surveillance System (SGSS) data. As we did not link our data on points 1 or 2 to symptom data, and our outcome may therefore include asymptomatic cases, we refer to our primary outcome as SARS-CoV-2 infection rather than COVID-19 disease for the purposes of this analysis, although as most testing is undertaken in response to symptoms the cases will largely represent symptomatic rather than asymptomatic infection.

## Covariates

Self-reported demographic data included age, sex, and ethnicity. We included clinically vulnerable status which was derived from self-reported data on immunosuppressive therapy, cancer diagnoses, and chronic disease status. Index of multiple deprivation quintiles was derived based upon Lower Layer Super Output Areas postcodes submitted during registration. Due to small sample sizes (particularly by staggering cohorts), we could not evaluate geographical region or ethnicity in detail; therefore, we classified ethnicity as “White British” or “Ethnic Minority”.

## Data Sources and Linkage

For SARs-CoV-2 infections, the primary source of data was the Virus Watch dataset linked to the Second-Generation Surveillance System (SGSS), which contains SARS-CoV-2 test results using data from hospitalisations (Pillar 1) and community testing (Pillar 2). Linkage was conducted by NHS Digital with the linkage variables being sent in March 2021. The linkage period for SGSS Pillar 1 encompassed data from March 2020 until August 2021 and from June 2020 until November 2021 for Pillar 2.

For vaccination data, the primary source of data was the Virus Watch dataset linked to the National Immunisation Management Service (*NIMS*) and encompasses vaccinations between October 9<sup>th</sup> 2020 and December 23<sup>rd</sup> 2021.

## Bias

To estimate the risk of SARs-CoV-2 infection after receiving the booster COVID-19 vaccine, time-to-event analyses could be conducted. However, evaluating time to SARs-CoV-2 infection may be confounded by the United Kingdom's strategy to prioritise booster vaccinations based upon age, clinical vulnerability, and exposure to the virus (for example, frontline healthcare workers). To tackle such biases, we used methods developed by Hernan and Robins that aim to tackle confounding by indication to appropriately estimate the average treatment effect<sup>7,9</sup>. This approach includes three primary components 1) excluding prevalent users of an intervention to estimate the impact of treatment initiation without the lingering effect of previous confounding treatment, 2) use of an intention to treat analysis as this is the common estimand in randomised controlled trials, and 3) the use of multiple staggered cohorts to appropriately account for "time zero" (or the start of follow-up).

To apply Hernan et al.'s recommendations, this study 1) use eligibility criteria that exclude those who are likely to have alternative protection from SARs-COV-2 (e.g., through prior natural infection), 2) assign individuals from the first vaccination dose and disregard changes in course and 3) stagger a single cohort based upon vaccination date; see the introduction for rationale of cohort staggering.

## Statistical Analysis

Pooled Cox proportional hazard models were used to estimate the time from vaccination until the primary outcome of SARS-CoV-2 infection, lost to follow-up (latest week of reporting to Virus Watch), or end of study (January 23<sup>rd</sup> 2022), whichever was earliest. Cohorts were split based upon the date of their booster vaccination with the cohort dates defined in table 1.

Multivariable adjustment was conducted using the following variables: age, sex, ethnic minority status, index of multiple deprivation quintiles and clinical vulnerable status (clinically vulnerable, clinically extremely vulnerable, or none identified). The models from the eight cohorts were pooled using a random-effects meta-analysis. Full case analysis was conducted for all analyses. Statistical analysis was conducted using R version 4.0.3,

## Ethical approval

This study has been approved by the Hampstead NHS Health Research Authority Ethics Committee. Ethics approval number - 20/HRA/2320.



## Results

Across the eight cohorts, among those who met the eligibility criteria (adults, with a recording of ChAdOx1 or BNT162b2 as a primary course without prior infection or missing data), a total of 19,692 participants received their booster vaccination between September 16th 2021 to January 5th 2022. The largest recruitment period was between October 28th 2021 to November 10th 2021, with 4,558 participants. The smallest recruitment period was between December 23rd 2021 to January 05 2022, with 350 participants. See Supplementary Figure 1 for the recruitment timeline of the emulated trials. Across all eight cohorts, 12,036 individuals had received the ChAdOx1 vaccine, whilst 7,656 received the BNT162b2 vaccine. Demographic characteristics were broadly similar between ChAdOx1 and BNT162b2, except for clinical vulnerability status and age, where BNT162b2 had slightly more clinically vulnerable patients with an older age group (See Table 2). Due to the staggered cohort design, it is more appropriate to compare individuals who were vaccinated in the same period. In brief, as time advanced, recipients of the booster doses were getting younger; prior to mid-December 2021, the age distributions for both vaccines were similar, however, after this period, those whose primary course was BNT162b2 were younger than their ChAdOx1 counterparts for any given day (Figure 1a). In terms of clinical vulnerability, both ChAdOx1 and BNT162b2 saw a decrease in the daily proportion of those identified as “clinically extremely vulnerable” (Figure 1b)

Both groups were followed up to a maximum of 129 days (from September 16th until January 23<sup>rd</sup>, 2022), with ChAdOx1 individuals producing a median follow-up duration of 67 days (IQR: 50, 83), whilst BNT162b2 had a median follow-up duration of 83 days (IQR: 65, 100). At 129 days, ChAdOx1 participants experienced an incidence of 71.8 infections per 1,000 (95%CI: 67.2 to 76.5) vaccinated individuals whilst BNT162b2 participants experienced an incidence of 76 infections per 1,000 (95%CI: 70.2 to 82.2) vaccinated individuals.

## Crude Analysis

ChAdOx1 produces a pooled unadjusted hazard ratio of 0.95 [95% HR: 0.84-1.06] in the incidence of SARS-CoV-2 infection when compared to BNT162b2 at up to 129 days. For the same period, the pooled unadjusted hazard ratio for females (reference being male) was 0.95 [95%CI: HR: 0.85 - 1.05]. Per year of age, the hazard ratio was 0.97 [95%CI: HR: 0.96 - 0.97]. With the reference variable being “No sign of clinical vulnerability”, the pooled unadjusted hazard ratio for clinically vulnerable was 0.90 [95%: HR: 0.77 - 1.06] and 0.96 [95%: HR: 0.80 - 1.15] for “Clinically extremely vulnerable”. The least deprived groups had a protective effect against SARs-CoV-2 infections compared to the most deprived groups. See Figure 2 for unadjusted hazard ratio estimates.

The change in rates of cumulative infections changed for all cohorts since the Omicron variant became the dominant strain of SARs-CoV-2 in the UK; those who were vaccinated earlier had a longer period of cumulative stability compared to those who were vaccinated closer or after the

Omicron was declared the dominant SARs-CoV-2 strain in the UK. See Figure 3 for the cumulative incidence rate of SARs-COV-2 infections grouped by vaccination cohort.

## Adjusted Analysis

After adjusting for age at vaccination, clinical vulnerability, IMD quintile, minority ethnic status and sex, the pooled adjusted hazard ratio for ChAdOx1 was 0.99 [95%CI: aHR: 0.88 - 1.11] suggesting no significant difference in vaccination effectiveness when compared to BNT162b2 after receiving an mRNA based booster vaccine (see Figure 2 – adjusted section)

## Sensitivity Analysis

Whilst the primary analysis only analysed vaccine induced protection, such results are less likely to be pragmatic due to the increased proportions of those being infected by SARs-CoV-2. Therefore, we conducted a sensitivity analysis that included those with a prior SARs-CoV-2 infection to their booster dose but we adjusted for this in our modelling to account for the impact of natural infection on the protection provided by the nucleocapsid antibody. This increased our cohort from 19,692 participants to 22,062 individuals with 8,472 receiving BNT162b2 and 13,590 receiving ChAdOx1 as their primary vaccine courses. Socio-demographics characteristics remained similar to the primary analysis (See supplementary material 2). Both the univariable and multivariable models remained similar to the primary analysis; having a prior SARs-CoV-2 infection prior to the booster vaccine demonstrated a protective effect in both univariable (HR: 0.72 [95%CI: 0.60 - 0.87]) and multivariable model (HR: 0.65 [95CI: 0.55 - 0.77]) (See supplementary material 3).

## Discussion

Our analysis was conducted in a community cohort of 19,692 people across England and Wales who received their booster vaccination between September 16<sup>th</sup> 2021 and January 5<sup>th</sup> 2022. We followed people up for risk of SARS-CoV-2 infection between September 16<sup>th</sup> 2021 and January 23<sup>rd</sup> 2022 and found that people who received ChAdOx1 vaccinations as their primary course had no difference in the incidence of SARS-CoV-2 infection compared to BNT162b2 during follow-up after we accounted for differences in demographic and clinical characteristics between our comparison groups as well as the time of vaccination.

Our analysis used a community sample design from across England and Wales, in cohort with diversity in terms of age, sex, and geographical location. We estimated effectiveness in a cohort with a median follow up of two months after a booster vaccination, and the majority of infections occurred during a period when Omicron became the dominant variant in the UK. A particular strength of our analysis was our ability to estimate vaccine effectiveness in a cohort that included large numbers of people who were either clinical vulnerable or clinically extremely vulnerable – a group that was prioritised for booster doses based upon need. Using this sample, we applied a trial emulation framework to mitigate against confounding by indication. As a result of this study design, our results are more likely to reflect a randomised controlled trial evaluating the same question.

Our staggered cohort approach has additional strengths. First, it enables us to account for the demographic and clinical risk factors of vaccines and make comparisons between similar demographically and clinically similar groups; this was demonstrated in the changing median age and declining clinical vulnerable status of our cohorts. Second, our approach helps control for changes in SARS-CoV-2 transmission rates driven by changes in public health policy such as the vaccination efforts (e.g., prioritised distribution), mask usage, limitations on movement as well the emergence of new SARS-CoV-2 variants and their transition to becoming the dominant SARS-CoV-2 strain into England and Wales which we graphically demonstrated in Figure 3. Therefore our approach controls for measured time-varying confounders and to some extent, it goes some way to mitigating against the impact of unmeasured time-varying confounders (i.e. SARS-CoV-2 strain).

Due to the reliance on self-reported observational studies, there is a risk of inconsistent and inaccurate data recording; however, this was mitigated through linkage to external data sources such as SGSS to complement missing incidence SARS-CoV-2 infections and NIMs to complement missing vaccination data. We measured the risk of SARS-CoV-2 infection as our primary outcome, and whilst this precedes hospitalisation or death, we were not able to look at these more severe outcomes, which is a limitation of our study. Our use of observational data may mean that there is residual and uncontrolled confounding. Unlike test-negative designs our approach does not implicitly control for differences in testing behaviour between groups, but since we are comparing vaccine regimes rather than vaccinated and unvaccinated individuals

we do not expect confounding by differential testing behaviour. Using multiple staggered cohorts reduces each cohort size, and as a result, we had difficulties with analysing certain covariates such as geographical region and ethnicity, which we had to combine into an aggregated category. We did not include occupation or geographical risk in our analyses, and these may result in imbalances in the comparison arms as both risks of exposure to SARS-CoV-2 infection and access to BNT162b2 varied geographically (due to its cold storage requirements) and by occupation (e.g., health and social care workers).

We found evidence of the same effectiveness of BNT162b2 compared to ChAdOx1 vaccines against SARS-CoV-2 infection after receiving a booster vaccination in England and Wales, a finding that contrasts previous analysis showing that prior to such boosters those who had ChAdOx1 as their primary course were at higher risk of a SARS-CoV-2 infection. In other analyses we have demonstrated that antibody levels are substantially higher following a primary course of BNT162b2 than following a primary course of ChAdOx1, that antibodies wane following a log-linear pattern and that risk of infection is increased in those with lower antibody levels. Thus we hypothesise that differential effectiveness of BNT162b2 and ChAdOx1 primary courses against infection are related to different antibody levels. We have also shown that following an mRNA booster dose antibody levels are similar regardless of the primary course and hypothesise that this accounts for the similar effectiveness of mRNA boosters regardless of primary regime. Our findings demonstrate the importance of mRNA booster doses in maintaining protection, particularly for those with a primary course of ChAdOx1.

## Funding

The Virus Watch study is supported by the MRC Grant Ref: MC\_PC 19070 awarded to UCL on 30 March 2020 and MRC Grant Ref: MR/V028375/1 awarded on 17 August 2020. The study also received \$15,000 of Facebook advertising credit to support a pilot social media recruitment campaign on 18th August 2020. This study was also supported by the Wellcome Trust through a Wellcome Clinical Research Career Development Fellowship to RA [206602]. SB and TB are supported by an MRC doctoral studentship (MR/N013867/1). The funders had no role in study design, data collection, analysis and interpretation, in the writing of this report, or in the decision to submit the paper for publication.

## Data Availability

We aim to share aggregate data from this project on our website and via a "Findings so far" section on our website - <https://ucl-virus-watch.net/>. We will also be sharing individual record level data on a research data sharing service such as the Office of National Statistics Secure Research Service. In sharing the data we will work within the principles set out in the UKRI Guidance on best practice in the management of research data. Access to use of the data whilst

research is being conducted will be managed by the Chief Investigators (ACH and RWA) in accordance with the principles set out in the UKRI guidance on best practice in the management of research data. We will put analysis code on publicly available repositories to enable their reuse.

## References

1. Nguyen VG, Yavlinsky A, Beale S, et al. *Comparative Effectiveness of ChAdOx1 versus BNT162b2 Vaccines against SARS-CoV-2 Infections in England and Wales: A Cohort Analysis Using Trial Emulation in the Virus Watch Community Data*. *Epidemiology*; 2021. doi:10.1101/2021.12.21.21268214
2. Shrotri M, Navaratnam AMD, Nguyen V, et al. Spike-antibody waning after second dose of BNT162b2 or ChAdOx1. *The Lancet*. 2021;398(10298):385-387. doi:10.1016/S0140-6736(21)01642-1
3. Munro APS, Janani L, Cornelius V, et al. Safety and immunogenicity of seven COVID-19 vaccines as a third dose (booster) following two doses of ChAdOx1 nCov-19 or BNT162b2 in the UK (COV-BOOST): a blinded, multicentre, randomised, controlled, phase 2 trial. *The Lancet*. 2021;398(10318):2258-2276. doi:10.1016/S0140-6736(21)02717-3
4. Andrews N, Stowe J, Kirsebom F, et al. *Effectiveness of COVID-19 Vaccines against the Omicron (B.1.1.529) Variant of Concern*. *Epidemiology*; 2021. doi:10.1101/2021.12.14.21267615
5. Ozasa K, Fukushima W. Commentary: Test-Negative Design Reduces Confounding by Healthcare-Seeking Attitude in Case-Control Studies. *J Epidemiol*. 2019;29(8):279-281. doi:10.2188/jea.JE20180177
6. Dean NE, Halloran ME, Longini, Jr IM. Temporal Confounding in the Test-Negative Design. *Am J Epidemiol*. 2020;189(11):1402-1407. doi:10.1093/aje/kwaa084
7. Hernán MA, Alonso A, Logan R, et al. Observational Studies Analyzed Like Randomized Experiments: An Application to Postmenopausal Hormone Therapy and Coronary Heart Disease. *Epidemiology*. 2008;19(6):766-779. doi:10.1097/EDE.0b013e3181875e61
8. Hayward A, Fragaszy E, Kovar J, et al. *Risk Factors, Symptom Reporting, Healthcare-Seeking Behaviour and Adherence to Public Health Guidance: Protocol for Virus Watch, a Prospective Community Cohort Study*. *Infectious Diseases (except HIV/AIDS)*; 2020. doi:10.1101/2020.12.15.20248254
9. Hernán MA, Robins JM. Using Big Data to Emulate a Target Trial When a Randomized Trial Is Not Available: Table 1. *Am J Epidemiol*. 2016;183(8):758-764. doi:10.1093/aje/kwv254

## Contributors

Study Conceptualisation: VGN, AY, RWA

Formal analysis: VGN, AY, RWA

Project administration: JK, VGN, SB, TB, AMDN, MS, SW.

Data curation: VGN, AMDN, CY, WLEF, MS.

Writing (original draft preparation): VGN, AY, RWA, ACH.

Writing (review and editing): All authors.

Data Access: All authors had full access to the data used in the study.

## Tables

Table 1: Details of the trial emulation framework used to conceptualise the observational study as a controlled trial

|                             | <b>Ideal Randomised Controlled Trial</b>                                                                                                                       | <b>Trial emulation</b>                                                                                                                                                                                                                                                                                                                                                                                                                                                             |
|-----------------------------|----------------------------------------------------------------------------------------------------------------------------------------------------------------|------------------------------------------------------------------------------------------------------------------------------------------------------------------------------------------------------------------------------------------------------------------------------------------------------------------------------------------------------------------------------------------------------------------------------------------------------------------------------------|
| <b>Eligibility Criteria</b> | <ul style="list-style-type: none"> <li>-At least 18 years old</li> <li>-No prior SARS-CoV-2 infection</li> <li>-Two doses of the SARs-CoV-2 vaccine</li> </ul> | <ul style="list-style-type: none"> <li>-At least 18 years old when vaccinated</li> <li>-No recorded SARS-CoV-2 infection prior to booster vaccination date, defined using: PCR, LFT, nucleocapsid antibodies and spike protein before 2021</li> <li>-Two doses of the SARs-CoV-2 vaccine</li> </ul>                                                                                                                                                                                |
| <b>Recruitment period</b>   | September 16th 2021 to January 05 2022                                                                                                                         | September 16th 2021 to January 05 2022 split by 14-day intervals: <ul style="list-style-type: none"> <li>-Cohort 1: 2021-09-16 to 2021-09-29</li> <li>-Cohort 2: 2021-09-30 to 2021-10-13</li> <li>-Cohort 3: 2021-10-14 to 2021-10-27</li> <li>-Cohort 4: 2021-10-28 to 2021-11-10</li> <li>-Cohort 5: 2021-11-11 to 2021-11-24</li> <li>-Cohort 6: 2021-11-25 to 2021-12-08</li> <li>-Cohort 7: 2021-12-09 to 2021-12-22</li> <li>-Cohort 8: 2021-12-23 to 2022-01-05</li> </ul> |
| <b>Follow-up duration</b>   | From 2021-09-16 to 2022-01-23                                                                                                                                  | From recorded booster vaccination date until 2022-01-23                                                                                                                                                                                                                                                                                                                                                                                                                            |
| <b>Outcome</b>              | <ul style="list-style-type: none"> <li>1) Positive PCR test for SARS-CoV-2</li> <li>2) Positive LFT for SARS-CoV-2</li> </ul>                                  | <ul style="list-style-type: none"> <li>1) Positive PCR test for SARS-CoV-2 (self-reported or linked data )</li> <li>2) Positive LFT for SARS-CoV-2 (self-reported or linked data)</li> </ul>                                                                                                                                                                                                                                                                                       |



|                                  |                                                                                                 |                                                                                                 |
|----------------------------------|-------------------------------------------------------------------------------------------------|-------------------------------------------------------------------------------------------------|
| <b>Treatments to be compared</b> | -Booster Dose with primary course of ChAdOx1<br>-Booster Dose with a primary course of BNT162b2 | -Booster Dose with primary course of ChAdOx1<br>-Booster Dose with a primary course of BNT162b2 |
| <b>Estimand</b>                  | Intention to treat based upon primary course                                                    | Intention to treat based upon primary course                                                    |
| <b>Analysis plan</b>             | Survival analysis (Kaplan Meier estimator)                                                      | Survival analysis (pooled multivariable Cox Proportional hazard models)                         |

Table 2: Demographics breakdown of the cohort.

| <b>Characteristic</b>    | <b>N</b> | <b>BNT162b2 ,<br/>N = 7,656<sup>1</sup></b> | <b>ChAdOx1 ,<br/>N = 12,036<sup>1</sup></b> | <b>p-value<sup>2</sup></b> |
|--------------------------|----------|---------------------------------------------|---------------------------------------------|----------------------------|
| <b>Age</b>               | 19,692   | 66 (57, 73)                                 | 63 (56, 69)                                 | <0.001                     |
| <b>Region name</b>       | 19,692   |                                             |                                             | <0.001                     |
| East Midlands            |          | 729 (9.5%)                                  | 1,135 (9.4%)                                |                            |
| East of England          |          | 1,710 (22%)                                 | 2,587 (21%)                                 |                            |
| London                   |          | 985 (13%)                                   | 1,132 (9.4%)                                |                            |
| North East               |          | 308 (4.0%)                                  | 660 (5.5%)                                  |                            |
| North West               |          | 853 (11%)                                   | 1,274 (11%)                                 |                            |
| South East               |          | 1,472 (19%)                                 | 2,421 (20%)                                 |                            |
| South West               |          | 621 (8.1%)                                  | 1,068 (8.9%)                                |                            |
| Wales                    |          | 184 (2.4%)                                  | 293 (2.4%)                                  |                            |
| West Midlands            |          | 421 (5.5%)                                  | 760 (6.3%)                                  |                            |
| Yorkshire and The Humber |          | 373 (4.9%)                                  | 706 (5.9%)                                  |                            |
| <b>IMD Quintile</b>      | 19,692   |                                             |                                             | 0.5                        |
| (Most Deprived) 1        |          | 551 (7.2%)                                  | 909 (7.6%)                                  |                            |
| 2                        |          | 1,046 (14%)                                 | 1,648 (14%)                                 |                            |
| 3                        |          | 1,607 (21%)                                 | 2,444 (20%)                                 |                            |
| 4                        |          | 1,981 (26%)                                 | 3,203 (27%)                                 |                            |
| (Least Deprived) 5       |          | 2,471 (32%)                                 | 3,832 (32%)                                 |                            |

|                                                                                      |        |              |              |        |
|--------------------------------------------------------------------------------------|--------|--------------|--------------|--------|
| <b>Sex</b>                                                                           | 19,692 |              |              | 0.2    |
| Male                                                                                 |        | 3,297 (43%)  | 5,307 (44%)  |        |
| Female                                                                               |        | 4,359 (57%)  | 6,729 (56%)  |        |
| <b>Ethnicity</b>                                                                     | 19,692 |              |              |        |
| White British                                                                        |        | 6,842 (89%)  | 11,007 (91%) |        |
| White Irish                                                                          |        | 128 (1.7%)   | 170 (1.4%)   |        |
| White Other                                                                          |        | 341 (4.5%)   | 457 (3.8%)   |        |
| Mixed                                                                                |        | 67 (0.9%)    | 91 (0.8%)    |        |
| South Asian                                                                          |        | 164 (2.1%)   | 171 (1.4%)   |        |
| Other Asian                                                                          |        | 54 (0.7%)    | 61 (0.5%)    |        |
| Black                                                                                |        | 29 (0.4%)    | 42 (0.3%)    |        |
| Other Ethnicity                                                                      |        | 31 (0.4%)    | 37 (0.3%)    |        |
| <b>Clinical Vulnerability</b>                                                        | 19,692 |              |              | <0.001 |
| Clinically extremely vulnerable                                                      |        | 1,095 (14%)  | 1,413 (12%)  |        |
| Clinically vulnerable                                                                |        | 2,424 (32%)  | 3,450 (29%)  |        |
| No sign of clinical vulnerability                                                    |        | 4,137 (54%)  | 7,173 (60%)  |        |
| <b>Followup Duration</b>                                                             | 19,692 | 83 (65, 100) | 67 (50, 83)  | <0.001 |
| <b>SARs-CoV-2 infection</b>                                                          | 19,692 | 582 (7.6%)   | 864 (7.2%)   | 0.3    |
| <sup>1</sup> Median (IQR); n (%)                                                     |        |              |              |        |
| <sup>2</sup> Wilcoxon rank sum test; Pearson's Chi-squared test; Fisher's exact test |        |              |              |        |

## Figures

Figure 1a (top). Distribution of age through time by primary vaccination course. The gradient for ChAdOx1 was decrease of 0.27 years per day [95%CI: -0.29 to -0.24] whilst the gradient for BNT162b2 was also a decrease 0.41 years per day [95%CI: -0.46 to -0.35].

Figure: 1b (bottom): Distribution of extremely clinical vulnerable status through time by primary vaccination course. The gradient for ChAdOx1 was a daily decrease of 0.003 proportions of Clinically Extremely Vulnerable [95%CI: -0.003 to -0.002] whilst the gradient for BNT162b2 was a daily decrease proportion of Clinically Extremely Vulnerable 0.001[95%CI: -0.001 to -0.001].

**Age Distribution through time by primary vaccine course**

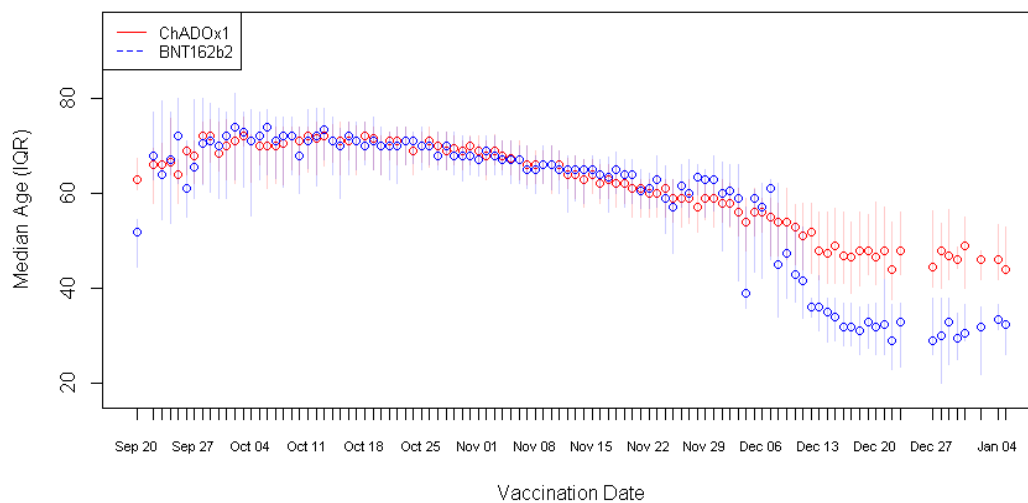

**Distribution of Clinically Extremely Vulnerable through time by vaccine course**

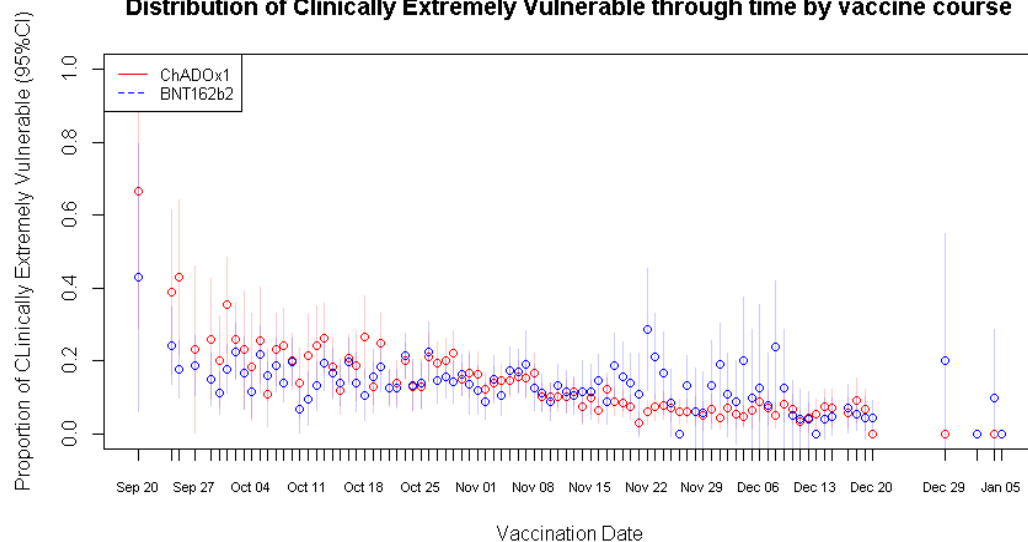

Figure 2: Adjusted and unadjusted random-effects meta-analysis for each covariate.

| Adjustment                                                  | Covariate                                                                                   | Random Effects Meta-analysis for each covariate                                                                                                                                                                                                                                                                                                                                                                                                                                                                                                                                                                                                                                                                                                                                                                                                                                                                                                                                                                                                                                                                                                                                                                                                                                                                                                                                                                                                                                                                                                                                                                                                                                                                                                                                                                                                                                                               |              |              |                     |                 |                 |                 |                 |                 |                          |       |        |  |      |              |      |      |                          |       |        |  |      |              |       |       |                          |       |        |  |      |              |       |       |                          |       |        |  |      |              |       |       |                          |       |        |  |      |              |       |       |                          |       |        |  |      |              |       |       |                          |       |        |  |      |              |       |       |                          |       |        |  |      |              |      |      |                            |  |  |  |             |                     |               |    |                             |  |  |  |             |                     |    |               |                                                             |  |  |  |  |  |  |  |
|-------------------------------------------------------------|---------------------------------------------------------------------------------------------|---------------------------------------------------------------------------------------------------------------------------------------------------------------------------------------------------------------------------------------------------------------------------------------------------------------------------------------------------------------------------------------------------------------------------------------------------------------------------------------------------------------------------------------------------------------------------------------------------------------------------------------------------------------------------------------------------------------------------------------------------------------------------------------------------------------------------------------------------------------------------------------------------------------------------------------------------------------------------------------------------------------------------------------------------------------------------------------------------------------------------------------------------------------------------------------------------------------------------------------------------------------------------------------------------------------------------------------------------------------------------------------------------------------------------------------------------------------------------------------------------------------------------------------------------------------------------------------------------------------------------------------------------------------------------------------------------------------------------------------------------------------------------------------------------------------------------------------------------------------------------------------------------------------|--------------|--------------|---------------------|-----------------|-----------------|-----------------|-----------------|-----------------|--------------------------|-------|--------|--|------|--------------|------|------|--------------------------|-------|--------|--|------|--------------|-------|-------|--------------------------|-------|--------|--|------|--------------|-------|-------|--------------------------|-------|--------|--|------|--------------|-------|-------|--------------------------|-------|--------|--|------|--------------|-------|-------|--------------------------|-------|--------|--|------|--------------|-------|-------|--------------------------|-------|--------|--|------|--------------|-------|-------|--------------------------|-------|--------|--|------|--------------|------|------|----------------------------|--|--|--|-------------|---------------------|---------------|----|-----------------------------|--|--|--|-------------|---------------------|----|---------------|-------------------------------------------------------------|--|--|--|--|--|--|--|
| Unadjusted                                                  | Age<br><br>(Continuous)                                                                     | <table border="1"> <thead> <tr> <th>Study</th> <th>TE</th> <th>seTE</th> <th>Hazard Ratio</th> <th>HR</th> <th>95%-CI</th> <th>Weight (common)</th> <th>Weight (random)</th> </tr> </thead> <tbody> <tr><td>2021-09-16_to_2021-09-29</td><td>-0.03</td><td>0.0086</td><td></td><td>0.97</td><td>[0.96; 0.99]</td><td>6.8%</td><td>7.7%</td></tr> <tr><td>2021-09-30_to_2021-10-13</td><td>-0.03</td><td>0.0052</td><td></td><td>0.97</td><td>[0.96; 0.98]</td><td>18.7%</td><td>17.7%</td></tr> <tr><td>2021-10-14_to_2021-10-27</td><td>-0.03</td><td>0.0057</td><td></td><td>0.97</td><td>[0.96; 0.98]</td><td>15.3%</td><td>15.2%</td></tr> <tr><td>2021-10-28_to_2021-11-10</td><td>-0.04</td><td>0.0051</td><td></td><td>0.96</td><td>[0.95; 0.97]</td><td>19.1%</td><td>18.0%</td></tr> <tr><td>2021-11-11_to_2021-11-24</td><td>-0.04</td><td>0.0059</td><td></td><td>0.97</td><td>[0.95; 0.98]</td><td>14.1%</td><td>14.3%</td></tr> <tr><td>2021-11-25_to_2021-12-08</td><td>-0.03</td><td>0.0071</td><td></td><td>0.97</td><td>[0.96; 0.98]</td><td>10.0%</td><td>10.8%</td></tr> <tr><td>2021-12-09_to_2021-12-22</td><td>-0.02</td><td>0.0058</td><td></td><td>0.98</td><td>[0.97; 0.99]</td><td>14.6%</td><td>14.7%</td></tr> <tr><td>2021-12-23_to_2022-01-05</td><td>-0.02</td><td>0.0190</td><td></td><td>0.98</td><td>[0.94; 1.02]</td><td>1.4%</td><td>1.7%</td></tr> <tr><td><b>Common effect model</b></td><td></td><td></td><td></td><td><b>0.97</b></td><td><b>[0.96; 0.97]</b></td><td><b>100.0%</b></td><td>--</td></tr> <tr><td><b>Random effects model</b></td><td></td><td></td><td></td><td><b>0.97</b></td><td><b>[0.96; 0.97]</b></td><td>--</td><td><b>100.0%</b></td></tr> <tr><td colspan="2">Heterogeneity: <math>I^2 = 7%</math>, <math>\tau^2 &lt; 0.0001</math>, <math>p = 0.37</math></td><td></td><td></td><td></td><td></td><td></td><td></td></tr> </tbody> </table> | Study        | TE           | seTE                | Hazard Ratio    | HR              | 95%-CI          | Weight (common) | Weight (random) | 2021-09-16_to_2021-09-29 | -0.03 | 0.0086 |  | 0.97 | [0.96; 0.99] | 6.8% | 7.7% | 2021-09-30_to_2021-10-13 | -0.03 | 0.0052 |  | 0.97 | [0.96; 0.98] | 18.7% | 17.7% | 2021-10-14_to_2021-10-27 | -0.03 | 0.0057 |  | 0.97 | [0.96; 0.98] | 15.3% | 15.2% | 2021-10-28_to_2021-11-10 | -0.04 | 0.0051 |  | 0.96 | [0.95; 0.97] | 19.1% | 18.0% | 2021-11-11_to_2021-11-24 | -0.04 | 0.0059 |  | 0.97 | [0.95; 0.98] | 14.1% | 14.3% | 2021-11-25_to_2021-12-08 | -0.03 | 0.0071 |  | 0.97 | [0.96; 0.98] | 10.0% | 10.8% | 2021-12-09_to_2021-12-22 | -0.02 | 0.0058 |  | 0.98 | [0.97; 0.99] | 14.6% | 14.7% | 2021-12-23_to_2022-01-05 | -0.02 | 0.0190 |  | 0.98 | [0.94; 1.02] | 1.4% | 1.7% | <b>Common effect model</b> |  |  |  | <b>0.97</b> | <b>[0.96; 0.97]</b> | <b>100.0%</b> | -- | <b>Random effects model</b> |  |  |  | <b>0.97</b> | <b>[0.96; 0.97]</b> | -- | <b>100.0%</b> | Heterogeneity: $I^2 = 7%$ , $\tau^2 < 0.0001$ , $p = 0.37$  |  |  |  |  |  |  |  |
|                                                             | Study                                                                                       | TE                                                                                                                                                                                                                                                                                                                                                                                                                                                                                                                                                                                                                                                                                                                                                                                                                                                                                                                                                                                                                                                                                                                                                                                                                                                                                                                                                                                                                                                                                                                                                                                                                                                                                                                                                                                                                                                                                                            | seTE         | Hazard Ratio | HR                  | 95%-CI          | Weight (common) | Weight (random) |                 |                 |                          |       |        |  |      |              |      |      |                          |       |        |  |      |              |       |       |                          |       |        |  |      |              |       |       |                          |       |        |  |      |              |       |       |                          |       |        |  |      |              |       |       |                          |       |        |  |      |              |       |       |                          |       |        |  |      |              |       |       |                          |       |        |  |      |              |      |      |                            |  |  |  |             |                     |               |    |                             |  |  |  |             |                     |    |               |                                                             |  |  |  |  |  |  |  |
|                                                             | 2021-09-16_to_2021-09-29                                                                    | -0.03                                                                                                                                                                                                                                                                                                                                                                                                                                                                                                                                                                                                                                                                                                                                                                                                                                                                                                                                                                                                                                                                                                                                                                                                                                                                                                                                                                                                                                                                                                                                                                                                                                                                                                                                                                                                                                                                                                         | 0.0086       |              | 0.97                | [0.96; 0.99]    | 6.8%            | 7.7%            |                 |                 |                          |       |        |  |      |              |      |      |                          |       |        |  |      |              |       |       |                          |       |        |  |      |              |       |       |                          |       |        |  |      |              |       |       |                          |       |        |  |      |              |       |       |                          |       |        |  |      |              |       |       |                          |       |        |  |      |              |       |       |                          |       |        |  |      |              |      |      |                            |  |  |  |             |                     |               |    |                             |  |  |  |             |                     |    |               |                                                             |  |  |  |  |  |  |  |
|                                                             | 2021-09-30_to_2021-10-13                                                                    | -0.03                                                                                                                                                                                                                                                                                                                                                                                                                                                                                                                                                                                                                                                                                                                                                                                                                                                                                                                                                                                                                                                                                                                                                                                                                                                                                                                                                                                                                                                                                                                                                                                                                                                                                                                                                                                                                                                                                                         | 0.0052       |              | 0.97                | [0.96; 0.98]    | 18.7%           | 17.7%           |                 |                 |                          |       |        |  |      |              |      |      |                          |       |        |  |      |              |       |       |                          |       |        |  |      |              |       |       |                          |       |        |  |      |              |       |       |                          |       |        |  |      |              |       |       |                          |       |        |  |      |              |       |       |                          |       |        |  |      |              |       |       |                          |       |        |  |      |              |      |      |                            |  |  |  |             |                     |               |    |                             |  |  |  |             |                     |    |               |                                                             |  |  |  |  |  |  |  |
| 2021-10-14_to_2021-10-27                                    | -0.03                                                                                       | 0.0057                                                                                                                                                                                                                                                                                                                                                                                                                                                                                                                                                                                                                                                                                                                                                                                                                                                                                                                                                                                                                                                                                                                                                                                                                                                                                                                                                                                                                                                                                                                                                                                                                                                                                                                                                                                                                                                                                                        |              | 0.97         | [0.96; 0.98]        | 15.3%           | 15.2%           |                 |                 |                 |                          |       |        |  |      |              |      |      |                          |       |        |  |      |              |       |       |                          |       |        |  |      |              |       |       |                          |       |        |  |      |              |       |       |                          |       |        |  |      |              |       |       |                          |       |        |  |      |              |       |       |                          |       |        |  |      |              |       |       |                          |       |        |  |      |              |      |      |                            |  |  |  |             |                     |               |    |                             |  |  |  |             |                     |    |               |                                                             |  |  |  |  |  |  |  |
| 2021-10-28_to_2021-11-10                                    | -0.04                                                                                       | 0.0051                                                                                                                                                                                                                                                                                                                                                                                                                                                                                                                                                                                                                                                                                                                                                                                                                                                                                                                                                                                                                                                                                                                                                                                                                                                                                                                                                                                                                                                                                                                                                                                                                                                                                                                                                                                                                                                                                                        |              | 0.96         | [0.95; 0.97]        | 19.1%           | 18.0%           |                 |                 |                 |                          |       |        |  |      |              |      |      |                          |       |        |  |      |              |       |       |                          |       |        |  |      |              |       |       |                          |       |        |  |      |              |       |       |                          |       |        |  |      |              |       |       |                          |       |        |  |      |              |       |       |                          |       |        |  |      |              |       |       |                          |       |        |  |      |              |      |      |                            |  |  |  |             |                     |               |    |                             |  |  |  |             |                     |    |               |                                                             |  |  |  |  |  |  |  |
| 2021-11-11_to_2021-11-24                                    | -0.04                                                                                       | 0.0059                                                                                                                                                                                                                                                                                                                                                                                                                                                                                                                                                                                                                                                                                                                                                                                                                                                                                                                                                                                                                                                                                                                                                                                                                                                                                                                                                                                                                                                                                                                                                                                                                                                                                                                                                                                                                                                                                                        |              | 0.97         | [0.95; 0.98]        | 14.1%           | 14.3%           |                 |                 |                 |                          |       |        |  |      |              |      |      |                          |       |        |  |      |              |       |       |                          |       |        |  |      |              |       |       |                          |       |        |  |      |              |       |       |                          |       |        |  |      |              |       |       |                          |       |        |  |      |              |       |       |                          |       |        |  |      |              |       |       |                          |       |        |  |      |              |      |      |                            |  |  |  |             |                     |               |    |                             |  |  |  |             |                     |    |               |                                                             |  |  |  |  |  |  |  |
| 2021-11-25_to_2021-12-08                                    | -0.03                                                                                       | 0.0071                                                                                                                                                                                                                                                                                                                                                                                                                                                                                                                                                                                                                                                                                                                                                                                                                                                                                                                                                                                                                                                                                                                                                                                                                                                                                                                                                                                                                                                                                                                                                                                                                                                                                                                                                                                                                                                                                                        |              | 0.97         | [0.96; 0.98]        | 10.0%           | 10.8%           |                 |                 |                 |                          |       |        |  |      |              |      |      |                          |       |        |  |      |              |       |       |                          |       |        |  |      |              |       |       |                          |       |        |  |      |              |       |       |                          |       |        |  |      |              |       |       |                          |       |        |  |      |              |       |       |                          |       |        |  |      |              |       |       |                          |       |        |  |      |              |      |      |                            |  |  |  |             |                     |               |    |                             |  |  |  |             |                     |    |               |                                                             |  |  |  |  |  |  |  |
| 2021-12-09_to_2021-12-22                                    | -0.02                                                                                       | 0.0058                                                                                                                                                                                                                                                                                                                                                                                                                                                                                                                                                                                                                                                                                                                                                                                                                                                                                                                                                                                                                                                                                                                                                                                                                                                                                                                                                                                                                                                                                                                                                                                                                                                                                                                                                                                                                                                                                                        |              | 0.98         | [0.97; 0.99]        | 14.6%           | 14.7%           |                 |                 |                 |                          |       |        |  |      |              |      |      |                          |       |        |  |      |              |       |       |                          |       |        |  |      |              |       |       |                          |       |        |  |      |              |       |       |                          |       |        |  |      |              |       |       |                          |       |        |  |      |              |       |       |                          |       |        |  |      |              |       |       |                          |       |        |  |      |              |      |      |                            |  |  |  |             |                     |               |    |                             |  |  |  |             |                     |    |               |                                                             |  |  |  |  |  |  |  |
| 2021-12-23_to_2022-01-05                                    | -0.02                                                                                       | 0.0190                                                                                                                                                                                                                                                                                                                                                                                                                                                                                                                                                                                                                                                                                                                                                                                                                                                                                                                                                                                                                                                                                                                                                                                                                                                                                                                                                                                                                                                                                                                                                                                                                                                                                                                                                                                                                                                                                                        |              | 0.98         | [0.94; 1.02]        | 1.4%            | 1.7%            |                 |                 |                 |                          |       |        |  |      |              |      |      |                          |       |        |  |      |              |       |       |                          |       |        |  |      |              |       |       |                          |       |        |  |      |              |       |       |                          |       |        |  |      |              |       |       |                          |       |        |  |      |              |       |       |                          |       |        |  |      |              |       |       |                          |       |        |  |      |              |      |      |                            |  |  |  |             |                     |               |    |                             |  |  |  |             |                     |    |               |                                                             |  |  |  |  |  |  |  |
| <b>Common effect model</b>                                  |                                                                                             |                                                                                                                                                                                                                                                                                                                                                                                                                                                                                                                                                                                                                                                                                                                                                                                                                                                                                                                                                                                                                                                                                                                                                                                                                                                                                                                                                                                                                                                                                                                                                                                                                                                                                                                                                                                                                                                                                                               |              | <b>0.97</b>  | <b>[0.96; 0.97]</b> | <b>100.0%</b>   | --              |                 |                 |                 |                          |       |        |  |      |              |      |      |                          |       |        |  |      |              |       |       |                          |       |        |  |      |              |       |       |                          |       |        |  |      |              |       |       |                          |       |        |  |      |              |       |       |                          |       |        |  |      |              |       |       |                          |       |        |  |      |              |       |       |                          |       |        |  |      |              |      |      |                            |  |  |  |             |                     |               |    |                             |  |  |  |             |                     |    |               |                                                             |  |  |  |  |  |  |  |
| <b>Random effects model</b>                                 |                                                                                             |                                                                                                                                                                                                                                                                                                                                                                                                                                                                                                                                                                                                                                                                                                                                                                                                                                                                                                                                                                                                                                                                                                                                                                                                                                                                                                                                                                                                                                                                                                                                                                                                                                                                                                                                                                                                                                                                                                               |              | <b>0.97</b>  | <b>[0.96; 0.97]</b> | --              | <b>100.0%</b>   |                 |                 |                 |                          |       |        |  |      |              |      |      |                          |       |        |  |      |              |       |       |                          |       |        |  |      |              |       |       |                          |       |        |  |      |              |       |       |                          |       |        |  |      |              |       |       |                          |       |        |  |      |              |       |       |                          |       |        |  |      |              |       |       |                          |       |        |  |      |              |      |      |                            |  |  |  |             |                     |               |    |                             |  |  |  |             |                     |    |               |                                                             |  |  |  |  |  |  |  |
| Heterogeneity: $I^2 = 7%$ , $\tau^2 < 0.0001$ , $p = 0.37$  |                                                                                             |                                                                                                                                                                                                                                                                                                                                                                                                                                                                                                                                                                                                                                                                                                                                                                                                                                                                                                                                                                                                                                                                                                                                                                                                                                                                                                                                                                                                                                                                                                                                                                                                                                                                                                                                                                                                                                                                                                               |              |              |                     |                 |                 |                 |                 |                 |                          |       |        |  |      |              |      |      |                          |       |        |  |      |              |       |       |                          |       |        |  |      |              |       |       |                          |       |        |  |      |              |       |       |                          |       |        |  |      |              |       |       |                          |       |        |  |      |              |       |       |                          |       |        |  |      |              |       |       |                          |       |        |  |      |              |      |      |                            |  |  |  |             |                     |               |    |                             |  |  |  |             |                     |    |               |                                                             |  |  |  |  |  |  |  |
|                                                             | Clinical vulnerability<br>(Clinically extremely vulnerable in reference to None Identified) | <table border="1"> <thead> <tr> <th>Study</th> <th>TE</th> <th>seTE</th> <th>Hazard Ratio</th> <th>HR</th> <th>95%-CI</th> <th>Weight (common)</th> <th>Weight (random)</th> </tr> </thead> <tbody> <tr><td>2021-09-16_to_2021-09-29</td><td>-0.66</td><td>0.3708</td><td></td><td>0.52</td><td>[0.25; 1.07]</td><td>5.1%</td><td>5.8%</td></tr> <tr><td>2021-09-30_to_2021-10-13</td><td>0.31</td><td>0.1941</td><td></td><td>1.36</td><td>[0.93; 1.99]</td><td>18.8%</td><td>18.7%</td></tr> <tr><td>2021-10-14_to_2021-10-27</td><td>0.06</td><td>0.1799</td><td></td><td>1.06</td><td>[0.74; 1.51]</td><td>21.8%</td><td>21.2%</td></tr> <tr><td>2021-10-28_to_2021-11-10</td><td>-0.04</td><td>0.1641</td><td></td><td>0.96</td><td>[0.70; 1.33]</td><td>26.2%</td><td>24.6%</td></tr> <tr><td>2021-11-11_to_2021-11-24</td><td>-0.15</td><td>0.2136</td><td></td><td>0.86</td><td>[0.56; 1.30]</td><td>15.5%</td><td>15.8%</td></tr> <tr><td>2021-11-25_to_2021-12-08</td><td>-0.39</td><td>0.3452</td><td></td><td>0.68</td><td>[0.34; 1.33]</td><td>5.9%</td><td>6.6%</td></tr> <tr><td>2021-12-09_to_2021-12-22</td><td>-0.20</td><td>0.3436</td><td></td><td>0.81</td><td>[0.42; 1.60]</td><td>6.0%</td><td>6.6%</td></tr> <tr><td>2021-12-23_to_2022-01-05</td><td>0.15</td><td>1.0381</td><td></td><td>1.16</td><td>[0.15; 8.85]</td><td>0.7%</td><td>0.8%</td></tr> <tr><td><b>Common effect model</b></td><td></td><td></td><td></td><td><b>0.97</b></td><td><b>[0.82; 1.14]</b></td><td><b>100.0%</b></td><td>--</td></tr> <tr><td><b>Random effects model</b></td><td></td><td></td><td></td><td><b>0.96</b></td><td><b>[0.80; 1.15]</b></td><td>--</td><td><b>100.0%</b></td></tr> <tr><td colspan="2">Heterogeneity: <math>I^2 = 11%</math>, <math>\tau^2 = 0.0069</math>, <math>p = 0.35</math></td><td></td><td></td><td></td><td></td><td></td><td></td></tr> </tbody> </table>          | Study        | TE           | seTE                | Hazard Ratio    | HR              | 95%-CI          | Weight (common) | Weight (random) | 2021-09-16_to_2021-09-29 | -0.66 | 0.3708 |  | 0.52 | [0.25; 1.07] | 5.1% | 5.8% | 2021-09-30_to_2021-10-13 | 0.31  | 0.1941 |  | 1.36 | [0.93; 1.99] | 18.8% | 18.7% | 2021-10-14_to_2021-10-27 | 0.06  | 0.1799 |  | 1.06 | [0.74; 1.51] | 21.8% | 21.2% | 2021-10-28_to_2021-11-10 | -0.04 | 0.1641 |  | 0.96 | [0.70; 1.33] | 26.2% | 24.6% | 2021-11-11_to_2021-11-24 | -0.15 | 0.2136 |  | 0.86 | [0.56; 1.30] | 15.5% | 15.8% | 2021-11-25_to_2021-12-08 | -0.39 | 0.3452 |  | 0.68 | [0.34; 1.33] | 5.9%  | 6.6%  | 2021-12-09_to_2021-12-22 | -0.20 | 0.3436 |  | 0.81 | [0.42; 1.60] | 6.0%  | 6.6%  | 2021-12-23_to_2022-01-05 | 0.15  | 1.0381 |  | 1.16 | [0.15; 8.85] | 0.7% | 0.8% | <b>Common effect model</b> |  |  |  | <b>0.97</b> | <b>[0.82; 1.14]</b> | <b>100.0%</b> | -- | <b>Random effects model</b> |  |  |  | <b>0.96</b> | <b>[0.80; 1.15]</b> | -- | <b>100.0%</b> | Heterogeneity: $I^2 = 11%$ , $\tau^2 = 0.0069$ , $p = 0.35$ |  |  |  |  |  |  |  |
| Study                                                       | TE                                                                                          | seTE                                                                                                                                                                                                                                                                                                                                                                                                                                                                                                                                                                                                                                                                                                                                                                                                                                                                                                                                                                                                                                                                                                                                                                                                                                                                                                                                                                                                                                                                                                                                                                                                                                                                                                                                                                                                                                                                                                          | Hazard Ratio | HR           | 95%-CI              | Weight (common) | Weight (random) |                 |                 |                 |                          |       |        |  |      |              |      |      |                          |       |        |  |      |              |       |       |                          |       |        |  |      |              |       |       |                          |       |        |  |      |              |       |       |                          |       |        |  |      |              |       |       |                          |       |        |  |      |              |       |       |                          |       |        |  |      |              |       |       |                          |       |        |  |      |              |      |      |                            |  |  |  |             |                     |               |    |                             |  |  |  |             |                     |    |               |                                                             |  |  |  |  |  |  |  |
| 2021-09-16_to_2021-09-29                                    | -0.66                                                                                       | 0.3708                                                                                                                                                                                                                                                                                                                                                                                                                                                                                                                                                                                                                                                                                                                                                                                                                                                                                                                                                                                                                                                                                                                                                                                                                                                                                                                                                                                                                                                                                                                                                                                                                                                                                                                                                                                                                                                                                                        |              | 0.52         | [0.25; 1.07]        | 5.1%            | 5.8%            |                 |                 |                 |                          |       |        |  |      |              |      |      |                          |       |        |  |      |              |       |       |                          |       |        |  |      |              |       |       |                          |       |        |  |      |              |       |       |                          |       |        |  |      |              |       |       |                          |       |        |  |      |              |       |       |                          |       |        |  |      |              |       |       |                          |       |        |  |      |              |      |      |                            |  |  |  |             |                     |               |    |                             |  |  |  |             |                     |    |               |                                                             |  |  |  |  |  |  |  |
| 2021-09-30_to_2021-10-13                                    | 0.31                                                                                        | 0.1941                                                                                                                                                                                                                                                                                                                                                                                                                                                                                                                                                                                                                                                                                                                                                                                                                                                                                                                                                                                                                                                                                                                                                                                                                                                                                                                                                                                                                                                                                                                                                                                                                                                                                                                                                                                                                                                                                                        |              | 1.36         | [0.93; 1.99]        | 18.8%           | 18.7%           |                 |                 |                 |                          |       |        |  |      |              |      |      |                          |       |        |  |      |              |       |       |                          |       |        |  |      |              |       |       |                          |       |        |  |      |              |       |       |                          |       |        |  |      |              |       |       |                          |       |        |  |      |              |       |       |                          |       |        |  |      |              |       |       |                          |       |        |  |      |              |      |      |                            |  |  |  |             |                     |               |    |                             |  |  |  |             |                     |    |               |                                                             |  |  |  |  |  |  |  |
| 2021-10-14_to_2021-10-27                                    | 0.06                                                                                        | 0.1799                                                                                                                                                                                                                                                                                                                                                                                                                                                                                                                                                                                                                                                                                                                                                                                                                                                                                                                                                                                                                                                                                                                                                                                                                                                                                                                                                                                                                                                                                                                                                                                                                                                                                                                                                                                                                                                                                                        |              | 1.06         | [0.74; 1.51]        | 21.8%           | 21.2%           |                 |                 |                 |                          |       |        |  |      |              |      |      |                          |       |        |  |      |              |       |       |                          |       |        |  |      |              |       |       |                          |       |        |  |      |              |       |       |                          |       |        |  |      |              |       |       |                          |       |        |  |      |              |       |       |                          |       |        |  |      |              |       |       |                          |       |        |  |      |              |      |      |                            |  |  |  |             |                     |               |    |                             |  |  |  |             |                     |    |               |                                                             |  |  |  |  |  |  |  |
| 2021-10-28_to_2021-11-10                                    | -0.04                                                                                       | 0.1641                                                                                                                                                                                                                                                                                                                                                                                                                                                                                                                                                                                                                                                                                                                                                                                                                                                                                                                                                                                                                                                                                                                                                                                                                                                                                                                                                                                                                                                                                                                                                                                                                                                                                                                                                                                                                                                                                                        |              | 0.96         | [0.70; 1.33]        | 26.2%           | 24.6%           |                 |                 |                 |                          |       |        |  |      |              |      |      |                          |       |        |  |      |              |       |       |                          |       |        |  |      |              |       |       |                          |       |        |  |      |              |       |       |                          |       |        |  |      |              |       |       |                          |       |        |  |      |              |       |       |                          |       |        |  |      |              |       |       |                          |       |        |  |      |              |      |      |                            |  |  |  |             |                     |               |    |                             |  |  |  |             |                     |    |               |                                                             |  |  |  |  |  |  |  |
| 2021-11-11_to_2021-11-24                                    | -0.15                                                                                       | 0.2136                                                                                                                                                                                                                                                                                                                                                                                                                                                                                                                                                                                                                                                                                                                                                                                                                                                                                                                                                                                                                                                                                                                                                                                                                                                                                                                                                                                                                                                                                                                                                                                                                                                                                                                                                                                                                                                                                                        |              | 0.86         | [0.56; 1.30]        | 15.5%           | 15.8%           |                 |                 |                 |                          |       |        |  |      |              |      |      |                          |       |        |  |      |              |       |       |                          |       |        |  |      |              |       |       |                          |       |        |  |      |              |       |       |                          |       |        |  |      |              |       |       |                          |       |        |  |      |              |       |       |                          |       |        |  |      |              |       |       |                          |       |        |  |      |              |      |      |                            |  |  |  |             |                     |               |    |                             |  |  |  |             |                     |    |               |                                                             |  |  |  |  |  |  |  |
| 2021-11-25_to_2021-12-08                                    | -0.39                                                                                       | 0.3452                                                                                                                                                                                                                                                                                                                                                                                                                                                                                                                                                                                                                                                                                                                                                                                                                                                                                                                                                                                                                                                                                                                                                                                                                                                                                                                                                                                                                                                                                                                                                                                                                                                                                                                                                                                                                                                                                                        |              | 0.68         | [0.34; 1.33]        | 5.9%            | 6.6%            |                 |                 |                 |                          |       |        |  |      |              |      |      |                          |       |        |  |      |              |       |       |                          |       |        |  |      |              |       |       |                          |       |        |  |      |              |       |       |                          |       |        |  |      |              |       |       |                          |       |        |  |      |              |       |       |                          |       |        |  |      |              |       |       |                          |       |        |  |      |              |      |      |                            |  |  |  |             |                     |               |    |                             |  |  |  |             |                     |    |               |                                                             |  |  |  |  |  |  |  |
| 2021-12-09_to_2021-12-22                                    | -0.20                                                                                       | 0.3436                                                                                                                                                                                                                                                                                                                                                                                                                                                                                                                                                                                                                                                                                                                                                                                                                                                                                                                                                                                                                                                                                                                                                                                                                                                                                                                                                                                                                                                                                                                                                                                                                                                                                                                                                                                                                                                                                                        |              | 0.81         | [0.42; 1.60]        | 6.0%            | 6.6%            |                 |                 |                 |                          |       |        |  |      |              |      |      |                          |       |        |  |      |              |       |       |                          |       |        |  |      |              |       |       |                          |       |        |  |      |              |       |       |                          |       |        |  |      |              |       |       |                          |       |        |  |      |              |       |       |                          |       |        |  |      |              |       |       |                          |       |        |  |      |              |      |      |                            |  |  |  |             |                     |               |    |                             |  |  |  |             |                     |    |               |                                                             |  |  |  |  |  |  |  |
| 2021-12-23_to_2022-01-05                                    | 0.15                                                                                        | 1.0381                                                                                                                                                                                                                                                                                                                                                                                                                                                                                                                                                                                                                                                                                                                                                                                                                                                                                                                                                                                                                                                                                                                                                                                                                                                                                                                                                                                                                                                                                                                                                                                                                                                                                                                                                                                                                                                                                                        |              | 1.16         | [0.15; 8.85]        | 0.7%            | 0.8%            |                 |                 |                 |                          |       |        |  |      |              |      |      |                          |       |        |  |      |              |       |       |                          |       |        |  |      |              |       |       |                          |       |        |  |      |              |       |       |                          |       |        |  |      |              |       |       |                          |       |        |  |      |              |       |       |                          |       |        |  |      |              |       |       |                          |       |        |  |      |              |      |      |                            |  |  |  |             |                     |               |    |                             |  |  |  |             |                     |    |               |                                                             |  |  |  |  |  |  |  |
| <b>Common effect model</b>                                  |                                                                                             |                                                                                                                                                                                                                                                                                                                                                                                                                                                                                                                                                                                                                                                                                                                                                                                                                                                                                                                                                                                                                                                                                                                                                                                                                                                                                                                                                                                                                                                                                                                                                                                                                                                                                                                                                                                                                                                                                                               |              | <b>0.97</b>  | <b>[0.82; 1.14]</b> | <b>100.0%</b>   | --              |                 |                 |                 |                          |       |        |  |      |              |      |      |                          |       |        |  |      |              |       |       |                          |       |        |  |      |              |       |       |                          |       |        |  |      |              |       |       |                          |       |        |  |      |              |       |       |                          |       |        |  |      |              |       |       |                          |       |        |  |      |              |       |       |                          |       |        |  |      |              |      |      |                            |  |  |  |             |                     |               |    |                             |  |  |  |             |                     |    |               |                                                             |  |  |  |  |  |  |  |
| <b>Random effects model</b>                                 |                                                                                             |                                                                                                                                                                                                                                                                                                                                                                                                                                                                                                                                                                                                                                                                                                                                                                                                                                                                                                                                                                                                                                                                                                                                                                                                                                                                                                                                                                                                                                                                                                                                                                                                                                                                                                                                                                                                                                                                                                               |              | <b>0.96</b>  | <b>[0.80; 1.15]</b> | --              | <b>100.0%</b>   |                 |                 |                 |                          |       |        |  |      |              |      |      |                          |       |        |  |      |              |       |       |                          |       |        |  |      |              |       |       |                          |       |        |  |      |              |       |       |                          |       |        |  |      |              |       |       |                          |       |        |  |      |              |       |       |                          |       |        |  |      |              |       |       |                          |       |        |  |      |              |      |      |                            |  |  |  |             |                     |               |    |                             |  |  |  |             |                     |    |               |                                                             |  |  |  |  |  |  |  |
| Heterogeneity: $I^2 = 11%$ , $\tau^2 = 0.0069$ , $p = 0.35$ |                                                                                             |                                                                                                                                                                                                                                                                                                                                                                                                                                                                                                                                                                                                                                                                                                                                                                                                                                                                                                                                                                                                                                                                                                                                                                                                                                                                                                                                                                                                                                                                                                                                                                                                                                                                                                                                                                                                                                                                                                               |              |              |                     |                 |                 |                 |                 |                 |                          |       |        |  |      |              |      |      |                          |       |        |  |      |              |       |       |                          |       |        |  |      |              |       |       |                          |       |        |  |      |              |       |       |                          |       |        |  |      |              |       |       |                          |       |        |  |      |              |       |       |                          |       |        |  |      |              |       |       |                          |       |        |  |      |              |      |      |                            |  |  |  |             |                     |               |    |                             |  |  |  |             |                     |    |               |                                                             |  |  |  |  |  |  |  |
|                                                             | Clinical vulnerability<br>(Clinically vulnerable in reference to None identified)           | <table border="1"> <thead> <tr> <th>Study</th> <th>TE</th> <th>seTE</th> <th>Hazard Ratio</th> <th>HR</th> <th>95%-CI</th> <th>Weight (common)</th> <th>Weight (random)</th> </tr> </thead> <tbody> <tr><td>2021-09-16_to_2021-09-29</td><td>-0.17</td><td>0.2810</td><td></td><td>0.85</td><td>[0.49; 1.47]</td><td>4.8%</td><td>6.8%</td></tr> <tr><td>2021-09-30_to_2021-10-13</td><td>0.32</td><td>0.1642</td><td></td><td>1.38</td><td>[1.00; 1.90]</td><td>14.1%</td><td>14.5%</td></tr> <tr><td>2021-10-14_to_2021-10-27</td><td>-0.21</td><td>0.1555</td><td></td><td>0.81</td><td>[0.60; 1.10]</td><td>15.7%</td><td>15.5%</td></tr> <tr><td>2021-10-28_to_2021-11-10</td><td>-0.21</td><td>0.1314</td><td></td><td>0.81</td><td>[0.63; 1.05]</td><td>22.0%</td><td>18.5%</td></tr> <tr><td>2021-11-11_to_2021-11-24</td><td>-0.24</td><td>0.1418</td><td></td><td>0.79</td><td>[0.60; 1.04]</td><td>18.9%</td><td>17.1%</td></tr> <tr><td>2021-11-25_to_2021-12-08</td><td>0.02</td><td>0.1675</td><td></td><td>1.03</td><td>[0.74; 1.42]</td><td>13.5%</td><td>14.2%</td></tr> <tr><td>2021-12-09_to_2021-12-22</td><td>-0.25</td><td>0.1930</td><td></td><td>0.78</td><td>[0.54; 1.14]</td><td>10.2%</td><td>11.8%</td></tr> <tr><td>2021-12-23_to_2022-01-05</td><td>-0.21</td><td>0.6407</td><td></td><td>0.81</td><td>[0.23; 2.86]</td><td>0.9%</td><td>1.5%</td></tr> <tr><td><b>Common effect model</b></td><td></td><td></td><td></td><td><b>0.90</b></td><td><b>[0.79; 1.01]</b></td><td><b>100.0%</b></td><td>--</td></tr> <tr><td><b>Random effects model</b></td><td></td><td></td><td></td><td><b>0.90</b></td><td><b>[0.77; 1.06]</b></td><td>--</td><td><b>100.0%</b></td></tr> <tr><td colspan="2">Heterogeneity: <math>I^2 = 29%</math>, <math>\tau^2 = 0.0183</math>, <math>p = 0.20</math></td><td></td><td></td><td></td><td></td><td></td><td></td></tr> </tbody> </table>     | Study        | TE           | seTE                | Hazard Ratio    | HR              | 95%-CI          | Weight (common) | Weight (random) | 2021-09-16_to_2021-09-29 | -0.17 | 0.2810 |  | 0.85 | [0.49; 1.47] | 4.8% | 6.8% | 2021-09-30_to_2021-10-13 | 0.32  | 0.1642 |  | 1.38 | [1.00; 1.90] | 14.1% | 14.5% | 2021-10-14_to_2021-10-27 | -0.21 | 0.1555 |  | 0.81 | [0.60; 1.10] | 15.7% | 15.5% | 2021-10-28_to_2021-11-10 | -0.21 | 0.1314 |  | 0.81 | [0.63; 1.05] | 22.0% | 18.5% | 2021-11-11_to_2021-11-24 | -0.24 | 0.1418 |  | 0.79 | [0.60; 1.04] | 18.9% | 17.1% | 2021-11-25_to_2021-12-08 | 0.02  | 0.1675 |  | 1.03 | [0.74; 1.42] | 13.5% | 14.2% | 2021-12-09_to_2021-12-22 | -0.25 | 0.1930 |  | 0.78 | [0.54; 1.14] | 10.2% | 11.8% | 2021-12-23_to_2022-01-05 | -0.21 | 0.6407 |  | 0.81 | [0.23; 2.86] | 0.9% | 1.5% | <b>Common effect model</b> |  |  |  | <b>0.90</b> | <b>[0.79; 1.01]</b> | <b>100.0%</b> | -- | <b>Random effects model</b> |  |  |  | <b>0.90</b> | <b>[0.77; 1.06]</b> | -- | <b>100.0%</b> | Heterogeneity: $I^2 = 29%$ , $\tau^2 = 0.0183$ , $p = 0.20$ |  |  |  |  |  |  |  |
| Study                                                       | TE                                                                                          | seTE                                                                                                                                                                                                                                                                                                                                                                                                                                                                                                                                                                                                                                                                                                                                                                                                                                                                                                                                                                                                                                                                                                                                                                                                                                                                                                                                                                                                                                                                                                                                                                                                                                                                                                                                                                                                                                                                                                          | Hazard Ratio | HR           | 95%-CI              | Weight (common) | Weight (random) |                 |                 |                 |                          |       |        |  |      |              |      |      |                          |       |        |  |      |              |       |       |                          |       |        |  |      |              |       |       |                          |       |        |  |      |              |       |       |                          |       |        |  |      |              |       |       |                          |       |        |  |      |              |       |       |                          |       |        |  |      |              |       |       |                          |       |        |  |      |              |      |      |                            |  |  |  |             |                     |               |    |                             |  |  |  |             |                     |    |               |                                                             |  |  |  |  |  |  |  |
| 2021-09-16_to_2021-09-29                                    | -0.17                                                                                       | 0.2810                                                                                                                                                                                                                                                                                                                                                                                                                                                                                                                                                                                                                                                                                                                                                                                                                                                                                                                                                                                                                                                                                                                                                                                                                                                                                                                                                                                                                                                                                                                                                                                                                                                                                                                                                                                                                                                                                                        |              | 0.85         | [0.49; 1.47]        | 4.8%            | 6.8%            |                 |                 |                 |                          |       |        |  |      |              |      |      |                          |       |        |  |      |              |       |       |                          |       |        |  |      |              |       |       |                          |       |        |  |      |              |       |       |                          |       |        |  |      |              |       |       |                          |       |        |  |      |              |       |       |                          |       |        |  |      |              |       |       |                          |       |        |  |      |              |      |      |                            |  |  |  |             |                     |               |    |                             |  |  |  |             |                     |    |               |                                                             |  |  |  |  |  |  |  |
| 2021-09-30_to_2021-10-13                                    | 0.32                                                                                        | 0.1642                                                                                                                                                                                                                                                                                                                                                                                                                                                                                                                                                                                                                                                                                                                                                                                                                                                                                                                                                                                                                                                                                                                                                                                                                                                                                                                                                                                                                                                                                                                                                                                                                                                                                                                                                                                                                                                                                                        |              | 1.38         | [1.00; 1.90]        | 14.1%           | 14.5%           |                 |                 |                 |                          |       |        |  |      |              |      |      |                          |       |        |  |      |              |       |       |                          |       |        |  |      |              |       |       |                          |       |        |  |      |              |       |       |                          |       |        |  |      |              |       |       |                          |       |        |  |      |              |       |       |                          |       |        |  |      |              |       |       |                          |       |        |  |      |              |      |      |                            |  |  |  |             |                     |               |    |                             |  |  |  |             |                     |    |               |                                                             |  |  |  |  |  |  |  |
| 2021-10-14_to_2021-10-27                                    | -0.21                                                                                       | 0.1555                                                                                                                                                                                                                                                                                                                                                                                                                                                                                                                                                                                                                                                                                                                                                                                                                                                                                                                                                                                                                                                                                                                                                                                                                                                                                                                                                                                                                                                                                                                                                                                                                                                                                                                                                                                                                                                                                                        |              | 0.81         | [0.60; 1.10]        | 15.7%           | 15.5%           |                 |                 |                 |                          |       |        |  |      |              |      |      |                          |       |        |  |      |              |       |       |                          |       |        |  |      |              |       |       |                          |       |        |  |      |              |       |       |                          |       |        |  |      |              |       |       |                          |       |        |  |      |              |       |       |                          |       |        |  |      |              |       |       |                          |       |        |  |      |              |      |      |                            |  |  |  |             |                     |               |    |                             |  |  |  |             |                     |    |               |                                                             |  |  |  |  |  |  |  |
| 2021-10-28_to_2021-11-10                                    | -0.21                                                                                       | 0.1314                                                                                                                                                                                                                                                                                                                                                                                                                                                                                                                                                                                                                                                                                                                                                                                                                                                                                                                                                                                                                                                                                                                                                                                                                                                                                                                                                                                                                                                                                                                                                                                                                                                                                                                                                                                                                                                                                                        |              | 0.81         | [0.63; 1.05]        | 22.0%           | 18.5%           |                 |                 |                 |                          |       |        |  |      |              |      |      |                          |       |        |  |      |              |       |       |                          |       |        |  |      |              |       |       |                          |       |        |  |      |              |       |       |                          |       |        |  |      |              |       |       |                          |       |        |  |      |              |       |       |                          |       |        |  |      |              |       |       |                          |       |        |  |      |              |      |      |                            |  |  |  |             |                     |               |    |                             |  |  |  |             |                     |    |               |                                                             |  |  |  |  |  |  |  |
| 2021-11-11_to_2021-11-24                                    | -0.24                                                                                       | 0.1418                                                                                                                                                                                                                                                                                                                                                                                                                                                                                                                                                                                                                                                                                                                                                                                                                                                                                                                                                                                                                                                                                                                                                                                                                                                                                                                                                                                                                                                                                                                                                                                                                                                                                                                                                                                                                                                                                                        |              | 0.79         | [0.60; 1.04]        | 18.9%           | 17.1%           |                 |                 |                 |                          |       |        |  |      |              |      |      |                          |       |        |  |      |              |       |       |                          |       |        |  |      |              |       |       |                          |       |        |  |      |              |       |       |                          |       |        |  |      |              |       |       |                          |       |        |  |      |              |       |       |                          |       |        |  |      |              |       |       |                          |       |        |  |      |              |      |      |                            |  |  |  |             |                     |               |    |                             |  |  |  |             |                     |    |               |                                                             |  |  |  |  |  |  |  |
| 2021-11-25_to_2021-12-08                                    | 0.02                                                                                        | 0.1675                                                                                                                                                                                                                                                                                                                                                                                                                                                                                                                                                                                                                                                                                                                                                                                                                                                                                                                                                                                                                                                                                                                                                                                                                                                                                                                                                                                                                                                                                                                                                                                                                                                                                                                                                                                                                                                                                                        |              | 1.03         | [0.74; 1.42]        | 13.5%           | 14.2%           |                 |                 |                 |                          |       |        |  |      |              |      |      |                          |       |        |  |      |              |       |       |                          |       |        |  |      |              |       |       |                          |       |        |  |      |              |       |       |                          |       |        |  |      |              |       |       |                          |       |        |  |      |              |       |       |                          |       |        |  |      |              |       |       |                          |       |        |  |      |              |      |      |                            |  |  |  |             |                     |               |    |                             |  |  |  |             |                     |    |               |                                                             |  |  |  |  |  |  |  |
| 2021-12-09_to_2021-12-22                                    | -0.25                                                                                       | 0.1930                                                                                                                                                                                                                                                                                                                                                                                                                                                                                                                                                                                                                                                                                                                                                                                                                                                                                                                                                                                                                                                                                                                                                                                                                                                                                                                                                                                                                                                                                                                                                                                                                                                                                                                                                                                                                                                                                                        |              | 0.78         | [0.54; 1.14]        | 10.2%           | 11.8%           |                 |                 |                 |                          |       |        |  |      |              |      |      |                          |       |        |  |      |              |       |       |                          |       |        |  |      |              |       |       |                          |       |        |  |      |              |       |       |                          |       |        |  |      |              |       |       |                          |       |        |  |      |              |       |       |                          |       |        |  |      |              |       |       |                          |       |        |  |      |              |      |      |                            |  |  |  |             |                     |               |    |                             |  |  |  |             |                     |    |               |                                                             |  |  |  |  |  |  |  |
| 2021-12-23_to_2022-01-05                                    | -0.21                                                                                       | 0.6407                                                                                                                                                                                                                                                                                                                                                                                                                                                                                                                                                                                                                                                                                                                                                                                                                                                                                                                                                                                                                                                                                                                                                                                                                                                                                                                                                                                                                                                                                                                                                                                                                                                                                                                                                                                                                                                                                                        |              | 0.81         | [0.23; 2.86]        | 0.9%            | 1.5%            |                 |                 |                 |                          |       |        |  |      |              |      |      |                          |       |        |  |      |              |       |       |                          |       |        |  |      |              |       |       |                          |       |        |  |      |              |       |       |                          |       |        |  |      |              |       |       |                          |       |        |  |      |              |       |       |                          |       |        |  |      |              |       |       |                          |       |        |  |      |              |      |      |                            |  |  |  |             |                     |               |    |                             |  |  |  |             |                     |    |               |                                                             |  |  |  |  |  |  |  |
| <b>Common effect model</b>                                  |                                                                                             |                                                                                                                                                                                                                                                                                                                                                                                                                                                                                                                                                                                                                                                                                                                                                                                                                                                                                                                                                                                                                                                                                                                                                                                                                                                                                                                                                                                                                                                                                                                                                                                                                                                                                                                                                                                                                                                                                                               |              | <b>0.90</b>  | <b>[0.79; 1.01]</b> | <b>100.0%</b>   | --              |                 |                 |                 |                          |       |        |  |      |              |      |      |                          |       |        |  |      |              |       |       |                          |       |        |  |      |              |       |       |                          |       |        |  |      |              |       |       |                          |       |        |  |      |              |       |       |                          |       |        |  |      |              |       |       |                          |       |        |  |      |              |       |       |                          |       |        |  |      |              |      |      |                            |  |  |  |             |                     |               |    |                             |  |  |  |             |                     |    |               |                                                             |  |  |  |  |  |  |  |
| <b>Random effects model</b>                                 |                                                                                             |                                                                                                                                                                                                                                                                                                                                                                                                                                                                                                                                                                                                                                                                                                                                                                                                                                                                                                                                                                                                                                                                                                                                                                                                                                                                                                                                                                                                                                                                                                                                                                                                                                                                                                                                                                                                                                                                                                               |              | <b>0.90</b>  | <b>[0.77; 1.06]</b> | --              | <b>100.0%</b>   |                 |                 |                 |                          |       |        |  |      |              |      |      |                          |       |        |  |      |              |       |       |                          |       |        |  |      |              |       |       |                          |       |        |  |      |              |       |       |                          |       |        |  |      |              |       |       |                          |       |        |  |      |              |       |       |                          |       |        |  |      |              |       |       |                          |       |        |  |      |              |      |      |                            |  |  |  |             |                     |               |    |                             |  |  |  |             |                     |    |               |                                                             |  |  |  |  |  |  |  |
| Heterogeneity: $I^2 = 29%$ , $\tau^2 = 0.0183$ , $p = 0.20$ |                                                                                             |                                                                                                                                                                                                                                                                                                                                                                                                                                                                                                                                                                                                                                                                                                                                                                                                                                                                                                                                                                                                                                                                                                                                                                                                                                                                                                                                                                                                                                                                                                                                                                                                                                                                                                                                                                                                                                                                                                               |              |              |                     |                 |                 |                 |                 |                 |                          |       |        |  |      |              |      |      |                          |       |        |  |      |              |       |       |                          |       |        |  |      |              |       |       |                          |       |        |  |      |              |       |       |                          |       |        |  |      |              |       |       |                          |       |        |  |      |              |       |       |                          |       |        |  |      |              |       |       |                          |       |        |  |      |              |      |      |                            |  |  |  |             |                     |               |    |                             |  |  |  |             |                     |    |               |                                                             |  |  |  |  |  |  |  |
|                                                             | Vaccine type - Oxford AstraZeneca ChAdOx1 in reference to Pfizer BioNTech BNT162b2          | <table border="1"> <thead> <tr> <th>Study</th> <th>TE</th> <th>seTE</th> <th>Hazard Ratio</th> <th>HR</th> <th>95%-CI</th> <th>Weight (common)</th> <th>Weight (random)</th> </tr> </thead> <tbody> <tr><td>2021-09-16_to_2021-09-29</td><td>-0.23</td><td>0.3433</td><td></td><td>0.80</td><td>[0.41; 1.56]</td><td>2.8%</td><td>2.8%</td></tr> <tr><td>2021-09-30_to_2021-10-13</td><td>0.01</td><td>0.1526</td><td></td><td>1.01</td><td>[0.75; 1.36]</td><td>14.4%</td><td>14.4%</td></tr> <tr><td>2021-10-14_to_2021-10-27</td><td>-0.23</td><td>0.1343</td><td></td><td>0.79</td><td>[0.61; 1.03]</td><td>18.6%</td><td>18.6%</td></tr> <tr><td>2021-10-28_to_2021-11-10</td><td>-0.08</td><td>0.1163</td><td></td><td>0.93</td><td>[0.74; 1.16]</td><td>24.8%</td><td>24.8%</td></tr> <tr><td>2021-11-11_to_2021-11-24</td><td>0.13</td><td>0.1415</td><td></td><td>1.14</td><td>[0.86; 1.50]</td><td>16.7%</td><td>16.7%</td></tr> <tr><td>2021-11-25_to_2021-12-08</td><td>-0.00</td><td>0.2118</td><td></td><td>1.00</td><td>[0.66; 1.51]</td><td>7.5%</td><td>7.5%</td></tr> <tr><td>2021-12-09_to_2021-12-22</td><td>-0.07</td><td>0.1566</td><td></td><td>0.93</td><td>[0.68; 1.27]</td><td>13.7%</td><td>13.7%</td></tr> <tr><td>2021-12-23_to_2022-01-05</td><td>-0.09</td><td>0.4863</td><td></td><td>0.91</td><td>[0.35; 2.37]</td><td>1.4%</td><td>1.4%</td></tr> <tr><td><b>Common effect model</b></td><td></td><td></td><td></td><td><b>0.95</b></td><td><b>[0.84; 1.06]</b></td><td><b>100.0%</b></td><td>--</td></tr> <tr><td><b>Random effects model</b></td><td></td><td></td><td></td><td><b>0.95</b></td><td><b>[0.84; 1.06]</b></td><td>--</td><td><b>100.0%</b></td></tr> <tr><td colspan="2">Heterogeneity: <math>I^2 = 0%</math>, <math>\tau^2 = 0</math>, <math>p = 0.77</math></td><td></td><td></td><td></td><td></td><td></td><td></td></tr> </tbody> </table>             | Study        | TE           | seTE                | Hazard Ratio    | HR              | 95%-CI          | Weight (common) | Weight (random) | 2021-09-16_to_2021-09-29 | -0.23 | 0.3433 |  | 0.80 | [0.41; 1.56] | 2.8% | 2.8% | 2021-09-30_to_2021-10-13 | 0.01  | 0.1526 |  | 1.01 | [0.75; 1.36] | 14.4% | 14.4% | 2021-10-14_to_2021-10-27 | -0.23 | 0.1343 |  | 0.79 | [0.61; 1.03] | 18.6% | 18.6% | 2021-10-28_to_2021-11-10 | -0.08 | 0.1163 |  | 0.93 | [0.74; 1.16] | 24.8% | 24.8% | 2021-11-11_to_2021-11-24 | 0.13  | 0.1415 |  | 1.14 | [0.86; 1.50] | 16.7% | 16.7% | 2021-11-25_to_2021-12-08 | -0.00 | 0.2118 |  | 1.00 | [0.66; 1.51] | 7.5%  | 7.5%  | 2021-12-09_to_2021-12-22 | -0.07 | 0.1566 |  | 0.93 | [0.68; 1.27] | 13.7% | 13.7% | 2021-12-23_to_2022-01-05 | -0.09 | 0.4863 |  | 0.91 | [0.35; 2.37] | 1.4% | 1.4% | <b>Common effect model</b> |  |  |  | <b>0.95</b> | <b>[0.84; 1.06]</b> | <b>100.0%</b> | -- | <b>Random effects model</b> |  |  |  | <b>0.95</b> | <b>[0.84; 1.06]</b> | -- | <b>100.0%</b> | Heterogeneity: $I^2 = 0%$ , $\tau^2 = 0$ , $p = 0.77$       |  |  |  |  |  |  |  |
| Study                                                       | TE                                                                                          | seTE                                                                                                                                                                                                                                                                                                                                                                                                                                                                                                                                                                                                                                                                                                                                                                                                                                                                                                                                                                                                                                                                                                                                                                                                                                                                                                                                                                                                                                                                                                                                                                                                                                                                                                                                                                                                                                                                                                          | Hazard Ratio | HR           | 95%-CI              | Weight (common) | Weight (random) |                 |                 |                 |                          |       |        |  |      |              |      |      |                          |       |        |  |      |              |       |       |                          |       |        |  |      |              |       |       |                          |       |        |  |      |              |       |       |                          |       |        |  |      |              |       |       |                          |       |        |  |      |              |       |       |                          |       |        |  |      |              |       |       |                          |       |        |  |      |              |      |      |                            |  |  |  |             |                     |               |    |                             |  |  |  |             |                     |    |               |                                                             |  |  |  |  |  |  |  |
| 2021-09-16_to_2021-09-29                                    | -0.23                                                                                       | 0.3433                                                                                                                                                                                                                                                                                                                                                                                                                                                                                                                                                                                                                                                                                                                                                                                                                                                                                                                                                                                                                                                                                                                                                                                                                                                                                                                                                                                                                                                                                                                                                                                                                                                                                                                                                                                                                                                                                                        |              | 0.80         | [0.41; 1.56]        | 2.8%            | 2.8%            |                 |                 |                 |                          |       |        |  |      |              |      |      |                          |       |        |  |      |              |       |       |                          |       |        |  |      |              |       |       |                          |       |        |  |      |              |       |       |                          |       |        |  |      |              |       |       |                          |       |        |  |      |              |       |       |                          |       |        |  |      |              |       |       |                          |       |        |  |      |              |      |      |                            |  |  |  |             |                     |               |    |                             |  |  |  |             |                     |    |               |                                                             |  |  |  |  |  |  |  |
| 2021-09-30_to_2021-10-13                                    | 0.01                                                                                        | 0.1526                                                                                                                                                                                                                                                                                                                                                                                                                                                                                                                                                                                                                                                                                                                                                                                                                                                                                                                                                                                                                                                                                                                                                                                                                                                                                                                                                                                                                                                                                                                                                                                                                                                                                                                                                                                                                                                                                                        |              | 1.01         | [0.75; 1.36]        | 14.4%           | 14.4%           |                 |                 |                 |                          |       |        |  |      |              |      |      |                          |       |        |  |      |              |       |       |                          |       |        |  |      |              |       |       |                          |       |        |  |      |              |       |       |                          |       |        |  |      |              |       |       |                          |       |        |  |      |              |       |       |                          |       |        |  |      |              |       |       |                          |       |        |  |      |              |      |      |                            |  |  |  |             |                     |               |    |                             |  |  |  |             |                     |    |               |                                                             |  |  |  |  |  |  |  |
| 2021-10-14_to_2021-10-27                                    | -0.23                                                                                       | 0.1343                                                                                                                                                                                                                                                                                                                                                                                                                                                                                                                                                                                                                                                                                                                                                                                                                                                                                                                                                                                                                                                                                                                                                                                                                                                                                                                                                                                                                                                                                                                                                                                                                                                                                                                                                                                                                                                                                                        |              | 0.79         | [0.61; 1.03]        | 18.6%           | 18.6%           |                 |                 |                 |                          |       |        |  |      |              |      |      |                          |       |        |  |      |              |       |       |                          |       |        |  |      |              |       |       |                          |       |        |  |      |              |       |       |                          |       |        |  |      |              |       |       |                          |       |        |  |      |              |       |       |                          |       |        |  |      |              |       |       |                          |       |        |  |      |              |      |      |                            |  |  |  |             |                     |               |    |                             |  |  |  |             |                     |    |               |                                                             |  |  |  |  |  |  |  |
| 2021-10-28_to_2021-11-10                                    | -0.08                                                                                       | 0.1163                                                                                                                                                                                                                                                                                                                                                                                                                                                                                                                                                                                                                                                                                                                                                                                                                                                                                                                                                                                                                                                                                                                                                                                                                                                                                                                                                                                                                                                                                                                                                                                                                                                                                                                                                                                                                                                                                                        |              | 0.93         | [0.74; 1.16]        | 24.8%           | 24.8%           |                 |                 |                 |                          |       |        |  |      |              |      |      |                          |       |        |  |      |              |       |       |                          |       |        |  |      |              |       |       |                          |       |        |  |      |              |       |       |                          |       |        |  |      |              |       |       |                          |       |        |  |      |              |       |       |                          |       |        |  |      |              |       |       |                          |       |        |  |      |              |      |      |                            |  |  |  |             |                     |               |    |                             |  |  |  |             |                     |    |               |                                                             |  |  |  |  |  |  |  |
| 2021-11-11_to_2021-11-24                                    | 0.13                                                                                        | 0.1415                                                                                                                                                                                                                                                                                                                                                                                                                                                                                                                                                                                                                                                                                                                                                                                                                                                                                                                                                                                                                                                                                                                                                                                                                                                                                                                                                                                                                                                                                                                                                                                                                                                                                                                                                                                                                                                                                                        |              | 1.14         | [0.86; 1.50]        | 16.7%           | 16.7%           |                 |                 |                 |                          |       |        |  |      |              |      |      |                          |       |        |  |      |              |       |       |                          |       |        |  |      |              |       |       |                          |       |        |  |      |              |       |       |                          |       |        |  |      |              |       |       |                          |       |        |  |      |              |       |       |                          |       |        |  |      |              |       |       |                          |       |        |  |      |              |      |      |                            |  |  |  |             |                     |               |    |                             |  |  |  |             |                     |    |               |                                                             |  |  |  |  |  |  |  |
| 2021-11-25_to_2021-12-08                                    | -0.00                                                                                       | 0.2118                                                                                                                                                                                                                                                                                                                                                                                                                                                                                                                                                                                                                                                                                                                                                                                                                                                                                                                                                                                                                                                                                                                                                                                                                                                                                                                                                                                                                                                                                                                                                                                                                                                                                                                                                                                                                                                                                                        |              | 1.00         | [0.66; 1.51]        | 7.5%            | 7.5%            |                 |                 |                 |                          |       |        |  |      |              |      |      |                          |       |        |  |      |              |       |       |                          |       |        |  |      |              |       |       |                          |       |        |  |      |              |       |       |                          |       |        |  |      |              |       |       |                          |       |        |  |      |              |       |       |                          |       |        |  |      |              |       |       |                          |       |        |  |      |              |      |      |                            |  |  |  |             |                     |               |    |                             |  |  |  |             |                     |    |               |                                                             |  |  |  |  |  |  |  |
| 2021-12-09_to_2021-12-22                                    | -0.07                                                                                       | 0.1566                                                                                                                                                                                                                                                                                                                                                                                                                                                                                                                                                                                                                                                                                                                                                                                                                                                                                                                                                                                                                                                                                                                                                                                                                                                                                                                                                                                                                                                                                                                                                                                                                                                                                                                                                                                                                                                                                                        |              | 0.93         | [0.68; 1.27]        | 13.7%           | 13.7%           |                 |                 |                 |                          |       |        |  |      |              |      |      |                          |       |        |  |      |              |       |       |                          |       |        |  |      |              |       |       |                          |       |        |  |      |              |       |       |                          |       |        |  |      |              |       |       |                          |       |        |  |      |              |       |       |                          |       |        |  |      |              |       |       |                          |       |        |  |      |              |      |      |                            |  |  |  |             |                     |               |    |                             |  |  |  |             |                     |    |               |                                                             |  |  |  |  |  |  |  |
| 2021-12-23_to_2022-01-05                                    | -0.09                                                                                       | 0.4863                                                                                                                                                                                                                                                                                                                                                                                                                                                                                                                                                                                                                                                                                                                                                                                                                                                                                                                                                                                                                                                                                                                                                                                                                                                                                                                                                                                                                                                                                                                                                                                                                                                                                                                                                                                                                                                                                                        |              | 0.91         | [0.35; 2.37]        | 1.4%            | 1.4%            |                 |                 |                 |                          |       |        |  |      |              |      |      |                          |       |        |  |      |              |       |       |                          |       |        |  |      |              |       |       |                          |       |        |  |      |              |       |       |                          |       |        |  |      |              |       |       |                          |       |        |  |      |              |       |       |                          |       |        |  |      |              |       |       |                          |       |        |  |      |              |      |      |                            |  |  |  |             |                     |               |    |                             |  |  |  |             |                     |    |               |                                                             |  |  |  |  |  |  |  |
| <b>Common effect model</b>                                  |                                                                                             |                                                                                                                                                                                                                                                                                                                                                                                                                                                                                                                                                                                                                                                                                                                                                                                                                                                                                                                                                                                                                                                                                                                                                                                                                                                                                                                                                                                                                                                                                                                                                                                                                                                                                                                                                                                                                                                                                                               |              | <b>0.95</b>  | <b>[0.84; 1.06]</b> | <b>100.0%</b>   | --              |                 |                 |                 |                          |       |        |  |      |              |      |      |                          |       |        |  |      |              |       |       |                          |       |        |  |      |              |       |       |                          |       |        |  |      |              |       |       |                          |       |        |  |      |              |       |       |                          |       |        |  |      |              |       |       |                          |       |        |  |      |              |       |       |                          |       |        |  |      |              |      |      |                            |  |  |  |             |                     |               |    |                             |  |  |  |             |                     |    |               |                                                             |  |  |  |  |  |  |  |
| <b>Random effects model</b>                                 |                                                                                             |                                                                                                                                                                                                                                                                                                                                                                                                                                                                                                                                                                                                                                                                                                                                                                                                                                                                                                                                                                                                                                                                                                                                                                                                                                                                                                                                                                                                                                                                                                                                                                                                                                                                                                                                                                                                                                                                                                               |              | <b>0.95</b>  | <b>[0.84; 1.06]</b> | --              | <b>100.0%</b>   |                 |                 |                 |                          |       |        |  |      |              |      |      |                          |       |        |  |      |              |       |       |                          |       |        |  |      |              |       |       |                          |       |        |  |      |              |       |       |                          |       |        |  |      |              |       |       |                          |       |        |  |      |              |       |       |                          |       |        |  |      |              |       |       |                          |       |        |  |      |              |      |      |                            |  |  |  |             |                     |               |    |                             |  |  |  |             |                     |    |               |                                                             |  |  |  |  |  |  |  |
| Heterogeneity: $I^2 = 0%$ , $\tau^2 = 0$ , $p = 0.77$       |                                                                                             |                                                                                                                                                                                                                                                                                                                                                                                                                                                                                                                                                                                                                                                                                                                                                                                                                                                                                                                                                                                                                                                                                                                                                                                                                                                                                                                                                                                                                                                                                                                                                                                                                                                                                                                                                                                                                                                                                                               |              |              |                     |                 |                 |                 |                 |                 |                          |       |        |  |      |              |      |      |                          |       |        |  |      |              |       |       |                          |       |        |  |      |              |       |       |                          |       |        |  |      |              |       |       |                          |       |        |  |      |              |       |       |                          |       |        |  |      |              |       |       |                          |       |        |  |      |              |       |       |                          |       |        |  |      |              |      |      |                            |  |  |  |             |                     |               |    |                             |  |  |  |             |                     |    |               |                                                             |  |  |  |  |  |  |  |

| <p>IMD Quintile 2 in reference to IMD Quintile 1</p> | <table border="1"> <thead> <tr> <th>Study</th> <th>TE</th> <th>seTE</th> <th>Hazard Ratio</th> <th>HR</th> <th>95%-CI</th> <th>Weight (common)</th> <th>Weight (random)</th> </tr> </thead> <tbody> <tr><td>2021-09-16_to_2021-09-29</td><td>0.67</td><td>0.6362</td><td></td><td>1.96</td><td>[0.56; 6.80]</td><td>2.8%</td><td>2.8%</td></tr> <tr><td>2021-09-30_to_2021-10-13</td><td>0.15</td><td>0.3376</td><td></td><td>1.16</td><td>[0.60; 2.24]</td><td>10.1%</td><td>10.1%</td></tr> <tr><td>2021-10-14_to_2021-10-27</td><td>-0.23</td><td>0.2792</td><td></td><td>0.80</td><td>[0.46; 1.38]</td><td>14.8%</td><td>14.8%</td></tr> <tr><td>2021-10-28_to_2021-11-10</td><td>-0.35</td><td>0.2292</td><td></td><td>0.71</td><td>[0.45; 1.11]</td><td>21.9%</td><td>21.9%</td></tr> <tr><td>2021-11-11_to_2021-11-24</td><td>0.07</td><td>0.2786</td><td></td><td>1.08</td><td>[0.62; 1.86]</td><td>14.8%</td><td>14.8%</td></tr> <tr><td>2021-11-25_to_2021-12-08</td><td>-0.13</td><td>0.2707</td><td></td><td>0.88</td><td>[0.52; 1.50]</td><td>15.7%</td><td>15.7%</td></tr> <tr><td>2021-12-09_to_2021-12-22</td><td>-0.11</td><td>0.2559</td><td></td><td>0.90</td><td>[0.54; 1.48]</td><td>17.6%</td><td>17.6%</td></tr> <tr><td>2021-12-23_to_2022-01-05</td><td>-0.24</td><td>0.7080</td><td></td><td>0.79</td><td>[0.20; 3.15]</td><td>2.3%</td><td>2.3%</td></tr> <tr><td><b>Common effect model</b></td><td></td><td></td><td></td><td><b>0.90</b></td><td><b>[0.73; 1.11]</b></td><td><b>100.0%</b></td><td><b>--</b></td></tr> <tr><td><b>Random effects model</b></td><td></td><td></td><td></td><td><b>0.90</b></td><td><b>[0.73; 1.11]</b></td><td><b>--</b></td><td><b>100.0%</b></td></tr> </tbody> </table> <p>Heterogeneity: <math>I^2 = 0\%</math>, <math>\tau^2 = 0</math>, <math>p = 0.80</math></p> 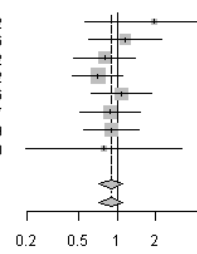         | Study  | TE           | seTE        | Hazard Ratio        | HR              | 95%-CI          | Weight (common) | Weight (random) | 2021-09-16_to_2021-09-29 | 0.67  | 0.6362 |  | 1.96 | [0.56; 6.80] | 2.8% | 2.8% | 2021-09-30_to_2021-10-13 | 0.15  | 0.3376 |  | 1.16 | [0.60; 2.24] | 10.1% | 10.1% | 2021-10-14_to_2021-10-27 | -0.23 | 0.2792 |  | 0.80 | [0.46; 1.38] | 14.8% | 14.8% | 2021-10-28_to_2021-11-10 | -0.35 | 0.2292 |  | 0.71 | [0.45; 1.11] | 21.9% | 21.9% | 2021-11-11_to_2021-11-24 | 0.07  | 0.2786 |  | 1.08 | [0.62; 1.86] | 14.8% | 14.8% | 2021-11-25_to_2021-12-08 | -0.13 | 0.2707 |  | 0.88 | [0.52; 1.50] | 15.7% | 15.7% | 2021-12-09_to_2021-12-22 | -0.11 | 0.2559 |  | 0.90 | [0.54; 1.48] | 17.6% | 17.6% | 2021-12-23_to_2022-01-05 | -0.24 | 0.7080 |  | 0.79 | [0.20; 3.15] | 2.3% | 2.3% | <b>Common effect model</b> |  |  |  | <b>0.90</b> | <b>[0.73; 1.11]</b> | <b>100.0%</b> | <b>--</b> | <b>Random effects model</b> |  |  |  | <b>0.90</b> | <b>[0.73; 1.11]</b> | <b>--</b> | <b>100.0%</b> |
|------------------------------------------------------|---------------------------------------------------------------------------------------------------------------------------------------------------------------------------------------------------------------------------------------------------------------------------------------------------------------------------------------------------------------------------------------------------------------------------------------------------------------------------------------------------------------------------------------------------------------------------------------------------------------------------------------------------------------------------------------------------------------------------------------------------------------------------------------------------------------------------------------------------------------------------------------------------------------------------------------------------------------------------------------------------------------------------------------------------------------------------------------------------------------------------------------------------------------------------------------------------------------------------------------------------------------------------------------------------------------------------------------------------------------------------------------------------------------------------------------------------------------------------------------------------------------------------------------------------------------------------------------------------------------------------------------------------------------------------------------------------------------------------------------------------------------------------------------------------------------------------------------------------------------------------------------------------------------------------------|--------|--------------|-------------|---------------------|-----------------|-----------------|-----------------|-----------------|--------------------------|-------|--------|--|------|--------------|------|------|--------------------------|-------|--------|--|------|--------------|-------|-------|--------------------------|-------|--------|--|------|--------------|-------|-------|--------------------------|-------|--------|--|------|--------------|-------|-------|--------------------------|-------|--------|--|------|--------------|-------|-------|--------------------------|-------|--------|--|------|--------------|-------|-------|--------------------------|-------|--------|--|------|--------------|-------|-------|--------------------------|-------|--------|--|------|--------------|------|------|----------------------------|--|--|--|-------------|---------------------|---------------|-----------|-----------------------------|--|--|--|-------------|---------------------|-----------|---------------|
| Study                                                | TE                                                                                                                                                                                                                                                                                                                                                                                                                                                                                                                                                                                                                                                                                                                                                                                                                                                                                                                                                                                                                                                                                                                                                                                                                                                                                                                                                                                                                                                                                                                                                                                                                                                                                                                                                                                                                                                                                                                              | seTE   | Hazard Ratio | HR          | 95%-CI              | Weight (common) | Weight (random) |                 |                 |                          |       |        |  |      |              |      |      |                          |       |        |  |      |              |       |       |                          |       |        |  |      |              |       |       |                          |       |        |  |      |              |       |       |                          |       |        |  |      |              |       |       |                          |       |        |  |      |              |       |       |                          |       |        |  |      |              |       |       |                          |       |        |  |      |              |      |      |                            |  |  |  |             |                     |               |           |                             |  |  |  |             |                     |           |               |
| 2021-09-16_to_2021-09-29                             | 0.67                                                                                                                                                                                                                                                                                                                                                                                                                                                                                                                                                                                                                                                                                                                                                                                                                                                                                                                                                                                                                                                                                                                                                                                                                                                                                                                                                                                                                                                                                                                                                                                                                                                                                                                                                                                                                                                                                                                            | 0.6362 |              | 1.96        | [0.56; 6.80]        | 2.8%            | 2.8%            |                 |                 |                          |       |        |  |      |              |      |      |                          |       |        |  |      |              |       |       |                          |       |        |  |      |              |       |       |                          |       |        |  |      |              |       |       |                          |       |        |  |      |              |       |       |                          |       |        |  |      |              |       |       |                          |       |        |  |      |              |       |       |                          |       |        |  |      |              |      |      |                            |  |  |  |             |                     |               |           |                             |  |  |  |             |                     |           |               |
| 2021-09-30_to_2021-10-13                             | 0.15                                                                                                                                                                                                                                                                                                                                                                                                                                                                                                                                                                                                                                                                                                                                                                                                                                                                                                                                                                                                                                                                                                                                                                                                                                                                                                                                                                                                                                                                                                                                                                                                                                                                                                                                                                                                                                                                                                                            | 0.3376 |              | 1.16        | [0.60; 2.24]        | 10.1%           | 10.1%           |                 |                 |                          |       |        |  |      |              |      |      |                          |       |        |  |      |              |       |       |                          |       |        |  |      |              |       |       |                          |       |        |  |      |              |       |       |                          |       |        |  |      |              |       |       |                          |       |        |  |      |              |       |       |                          |       |        |  |      |              |       |       |                          |       |        |  |      |              |      |      |                            |  |  |  |             |                     |               |           |                             |  |  |  |             |                     |           |               |
| 2021-10-14_to_2021-10-27                             | -0.23                                                                                                                                                                                                                                                                                                                                                                                                                                                                                                                                                                                                                                                                                                                                                                                                                                                                                                                                                                                                                                                                                                                                                                                                                                                                                                                                                                                                                                                                                                                                                                                                                                                                                                                                                                                                                                                                                                                           | 0.2792 |              | 0.80        | [0.46; 1.38]        | 14.8%           | 14.8%           |                 |                 |                          |       |        |  |      |              |      |      |                          |       |        |  |      |              |       |       |                          |       |        |  |      |              |       |       |                          |       |        |  |      |              |       |       |                          |       |        |  |      |              |       |       |                          |       |        |  |      |              |       |       |                          |       |        |  |      |              |       |       |                          |       |        |  |      |              |      |      |                            |  |  |  |             |                     |               |           |                             |  |  |  |             |                     |           |               |
| 2021-10-28_to_2021-11-10                             | -0.35                                                                                                                                                                                                                                                                                                                                                                                                                                                                                                                                                                                                                                                                                                                                                                                                                                                                                                                                                                                                                                                                                                                                                                                                                                                                                                                                                                                                                                                                                                                                                                                                                                                                                                                                                                                                                                                                                                                           | 0.2292 |              | 0.71        | [0.45; 1.11]        | 21.9%           | 21.9%           |                 |                 |                          |       |        |  |      |              |      |      |                          |       |        |  |      |              |       |       |                          |       |        |  |      |              |       |       |                          |       |        |  |      |              |       |       |                          |       |        |  |      |              |       |       |                          |       |        |  |      |              |       |       |                          |       |        |  |      |              |       |       |                          |       |        |  |      |              |      |      |                            |  |  |  |             |                     |               |           |                             |  |  |  |             |                     |           |               |
| 2021-11-11_to_2021-11-24                             | 0.07                                                                                                                                                                                                                                                                                                                                                                                                                                                                                                                                                                                                                                                                                                                                                                                                                                                                                                                                                                                                                                                                                                                                                                                                                                                                                                                                                                                                                                                                                                                                                                                                                                                                                                                                                                                                                                                                                                                            | 0.2786 |              | 1.08        | [0.62; 1.86]        | 14.8%           | 14.8%           |                 |                 |                          |       |        |  |      |              |      |      |                          |       |        |  |      |              |       |       |                          |       |        |  |      |              |       |       |                          |       |        |  |      |              |       |       |                          |       |        |  |      |              |       |       |                          |       |        |  |      |              |       |       |                          |       |        |  |      |              |       |       |                          |       |        |  |      |              |      |      |                            |  |  |  |             |                     |               |           |                             |  |  |  |             |                     |           |               |
| 2021-11-25_to_2021-12-08                             | -0.13                                                                                                                                                                                                                                                                                                                                                                                                                                                                                                                                                                                                                                                                                                                                                                                                                                                                                                                                                                                                                                                                                                                                                                                                                                                                                                                                                                                                                                                                                                                                                                                                                                                                                                                                                                                                                                                                                                                           | 0.2707 |              | 0.88        | [0.52; 1.50]        | 15.7%           | 15.7%           |                 |                 |                          |       |        |  |      |              |      |      |                          |       |        |  |      |              |       |       |                          |       |        |  |      |              |       |       |                          |       |        |  |      |              |       |       |                          |       |        |  |      |              |       |       |                          |       |        |  |      |              |       |       |                          |       |        |  |      |              |       |       |                          |       |        |  |      |              |      |      |                            |  |  |  |             |                     |               |           |                             |  |  |  |             |                     |           |               |
| 2021-12-09_to_2021-12-22                             | -0.11                                                                                                                                                                                                                                                                                                                                                                                                                                                                                                                                                                                                                                                                                                                                                                                                                                                                                                                                                                                                                                                                                                                                                                                                                                                                                                                                                                                                                                                                                                                                                                                                                                                                                                                                                                                                                                                                                                                           | 0.2559 |              | 0.90        | [0.54; 1.48]        | 17.6%           | 17.6%           |                 |                 |                          |       |        |  |      |              |      |      |                          |       |        |  |      |              |       |       |                          |       |        |  |      |              |       |       |                          |       |        |  |      |              |       |       |                          |       |        |  |      |              |       |       |                          |       |        |  |      |              |       |       |                          |       |        |  |      |              |       |       |                          |       |        |  |      |              |      |      |                            |  |  |  |             |                     |               |           |                             |  |  |  |             |                     |           |               |
| 2021-12-23_to_2022-01-05                             | -0.24                                                                                                                                                                                                                                                                                                                                                                                                                                                                                                                                                                                                                                                                                                                                                                                                                                                                                                                                                                                                                                                                                                                                                                                                                                                                                                                                                                                                                                                                                                                                                                                                                                                                                                                                                                                                                                                                                                                           | 0.7080 |              | 0.79        | [0.20; 3.15]        | 2.3%            | 2.3%            |                 |                 |                          |       |        |  |      |              |      |      |                          |       |        |  |      |              |       |       |                          |       |        |  |      |              |       |       |                          |       |        |  |      |              |       |       |                          |       |        |  |      |              |       |       |                          |       |        |  |      |              |       |       |                          |       |        |  |      |              |       |       |                          |       |        |  |      |              |      |      |                            |  |  |  |             |                     |               |           |                             |  |  |  |             |                     |           |               |
| <b>Common effect model</b>                           |                                                                                                                                                                                                                                                                                                                                                                                                                                                                                                                                                                                                                                                                                                                                                                                                                                                                                                                                                                                                                                                                                                                                                                                                                                                                                                                                                                                                                                                                                                                                                                                                                                                                                                                                                                                                                                                                                                                                 |        |              | <b>0.90</b> | <b>[0.73; 1.11]</b> | <b>100.0%</b>   | <b>--</b>       |                 |                 |                          |       |        |  |      |              |      |      |                          |       |        |  |      |              |       |       |                          |       |        |  |      |              |       |       |                          |       |        |  |      |              |       |       |                          |       |        |  |      |              |       |       |                          |       |        |  |      |              |       |       |                          |       |        |  |      |              |       |       |                          |       |        |  |      |              |      |      |                            |  |  |  |             |                     |               |           |                             |  |  |  |             |                     |           |               |
| <b>Random effects model</b>                          |                                                                                                                                                                                                                                                                                                                                                                                                                                                                                                                                                                                                                                                                                                                                                                                                                                                                                                                                                                                                                                                                                                                                                                                                                                                                                                                                                                                                                                                                                                                                                                                                                                                                                                                                                                                                                                                                                                                                 |        |              | <b>0.90</b> | <b>[0.73; 1.11]</b> | <b>--</b>       | <b>100.0%</b>   |                 |                 |                          |       |        |  |      |              |      |      |                          |       |        |  |      |              |       |       |                          |       |        |  |      |              |       |       |                          |       |        |  |      |              |       |       |                          |       |        |  |      |              |       |       |                          |       |        |  |      |              |       |       |                          |       |        |  |      |              |       |       |                          |       |        |  |      |              |      |      |                            |  |  |  |             |                     |               |           |                             |  |  |  |             |                     |           |               |
| <p>IMD Quintile 3 in reference to IMD Quintile 1</p> | <table border="1"> <thead> <tr> <th>Study</th> <th>TE</th> <th>seTE</th> <th>Hazard Ratio</th> <th>HR</th> <th>95%-CI</th> <th>Weight (common)</th> <th>Weight (random)</th> </tr> </thead> <tbody> <tr><td>2021-09-16_to_2021-09-29</td><td>0.06</td><td>0.6514</td><td></td><td>1.07</td><td>[0.30; 3.82]</td><td>2.6%</td><td>2.6%</td></tr> <tr><td>2021-09-30_to_2021-10-13</td><td>-0.03</td><td>0.3203</td><td></td><td>0.97</td><td>[0.52; 1.82]</td><td>10.8%</td><td>10.8%</td></tr> <tr><td>2021-10-14_to_2021-10-27</td><td>-0.41</td><td>0.2652</td><td></td><td>0.66</td><td>[0.39; 1.12]</td><td>15.8%</td><td>15.8%</td></tr> <tr><td>2021-10-28_to_2021-11-10</td><td>-0.58</td><td>0.2202</td><td></td><td>0.56</td><td>[0.36; 0.86]</td><td>22.9%</td><td>22.9%</td></tr> <tr><td>2021-11-11_to_2021-11-24</td><td>-0.18</td><td>0.2661</td><td></td><td>0.83</td><td>[0.49; 1.40]</td><td>15.7%</td><td>15.7%</td></tr> <tr><td>2021-11-25_to_2021-12-08</td><td>-0.51</td><td>0.2753</td><td></td><td>0.60</td><td>[0.35; 1.03]</td><td>14.7%</td><td>14.7%</td></tr> <tr><td>2021-12-09_to_2021-12-22</td><td>-0.43</td><td>0.2680</td><td></td><td>0.65</td><td>[0.38; 1.10]</td><td>15.5%</td><td>15.5%</td></tr> <tr><td>2021-12-23_to_2022-01-05</td><td>-0.66</td><td>0.7641</td><td></td><td>0.51</td><td>[0.12; 2.30]</td><td>1.9%</td><td>1.9%</td></tr> <tr><td><b>Common effect model</b></td><td></td><td></td><td></td><td><b>0.68</b></td><td><b>[0.55; 0.84]</b></td><td><b>100.0%</b></td><td><b>--</b></td></tr> <tr><td><b>Random effects model</b></td><td></td><td></td><td></td><td><b>0.68</b></td><td><b>[0.55; 0.84]</b></td><td><b>--</b></td><td><b>100.0%</b></td></tr> </tbody> </table> <p>Heterogeneity: <math>I^2 = 0\%</math>, <math>\tau^2 = 0</math>, <math>p = 0.84</math></p>        | Study  | TE           | seTE        | Hazard Ratio        | HR              | 95%-CI          | Weight (common) | Weight (random) | 2021-09-16_to_2021-09-29 | 0.06  | 0.6514 |  | 1.07 | [0.30; 3.82] | 2.6% | 2.6% | 2021-09-30_to_2021-10-13 | -0.03 | 0.3203 |  | 0.97 | [0.52; 1.82] | 10.8% | 10.8% | 2021-10-14_to_2021-10-27 | -0.41 | 0.2652 |  | 0.66 | [0.39; 1.12] | 15.8% | 15.8% | 2021-10-28_to_2021-11-10 | -0.58 | 0.2202 |  | 0.56 | [0.36; 0.86] | 22.9% | 22.9% | 2021-11-11_to_2021-11-24 | -0.18 | 0.2661 |  | 0.83 | [0.49; 1.40] | 15.7% | 15.7% | 2021-11-25_to_2021-12-08 | -0.51 | 0.2753 |  | 0.60 | [0.35; 1.03] | 14.7% | 14.7% | 2021-12-09_to_2021-12-22 | -0.43 | 0.2680 |  | 0.65 | [0.38; 1.10] | 15.5% | 15.5% | 2021-12-23_to_2022-01-05 | -0.66 | 0.7641 |  | 0.51 | [0.12; 2.30] | 1.9% | 1.9% | <b>Common effect model</b> |  |  |  | <b>0.68</b> | <b>[0.55; 0.84]</b> | <b>100.0%</b> | <b>--</b> | <b>Random effects model</b> |  |  |  | <b>0.68</b> | <b>[0.55; 0.84]</b> | <b>--</b> | <b>100.0%</b> |
| Study                                                | TE                                                                                                                                                                                                                                                                                                                                                                                                                                                                                                                                                                                                                                                                                                                                                                                                                                                                                                                                                                                                                                                                                                                                                                                                                                                                                                                                                                                                                                                                                                                                                                                                                                                                                                                                                                                                                                                                                                                              | seTE   | Hazard Ratio | HR          | 95%-CI              | Weight (common) | Weight (random) |                 |                 |                          |       |        |  |      |              |      |      |                          |       |        |  |      |              |       |       |                          |       |        |  |      |              |       |       |                          |       |        |  |      |              |       |       |                          |       |        |  |      |              |       |       |                          |       |        |  |      |              |       |       |                          |       |        |  |      |              |       |       |                          |       |        |  |      |              |      |      |                            |  |  |  |             |                     |               |           |                             |  |  |  |             |                     |           |               |
| 2021-09-16_to_2021-09-29                             | 0.06                                                                                                                                                                                                                                                                                                                                                                                                                                                                                                                                                                                                                                                                                                                                                                                                                                                                                                                                                                                                                                                                                                                                                                                                                                                                                                                                                                                                                                                                                                                                                                                                                                                                                                                                                                                                                                                                                                                            | 0.6514 |              | 1.07        | [0.30; 3.82]        | 2.6%            | 2.6%            |                 |                 |                          |       |        |  |      |              |      |      |                          |       |        |  |      |              |       |       |                          |       |        |  |      |              |       |       |                          |       |        |  |      |              |       |       |                          |       |        |  |      |              |       |       |                          |       |        |  |      |              |       |       |                          |       |        |  |      |              |       |       |                          |       |        |  |      |              |      |      |                            |  |  |  |             |                     |               |           |                             |  |  |  |             |                     |           |               |
| 2021-09-30_to_2021-10-13                             | -0.03                                                                                                                                                                                                                                                                                                                                                                                                                                                                                                                                                                                                                                                                                                                                                                                                                                                                                                                                                                                                                                                                                                                                                                                                                                                                                                                                                                                                                                                                                                                                                                                                                                                                                                                                                                                                                                                                                                                           | 0.3203 |              | 0.97        | [0.52; 1.82]        | 10.8%           | 10.8%           |                 |                 |                          |       |        |  |      |              |      |      |                          |       |        |  |      |              |       |       |                          |       |        |  |      |              |       |       |                          |       |        |  |      |              |       |       |                          |       |        |  |      |              |       |       |                          |       |        |  |      |              |       |       |                          |       |        |  |      |              |       |       |                          |       |        |  |      |              |      |      |                            |  |  |  |             |                     |               |           |                             |  |  |  |             |                     |           |               |
| 2021-10-14_to_2021-10-27                             | -0.41                                                                                                                                                                                                                                                                                                                                                                                                                                                                                                                                                                                                                                                                                                                                                                                                                                                                                                                                                                                                                                                                                                                                                                                                                                                                                                                                                                                                                                                                                                                                                                                                                                                                                                                                                                                                                                                                                                                           | 0.2652 |              | 0.66        | [0.39; 1.12]        | 15.8%           | 15.8%           |                 |                 |                          |       |        |  |      |              |      |      |                          |       |        |  |      |              |       |       |                          |       |        |  |      |              |       |       |                          |       |        |  |      |              |       |       |                          |       |        |  |      |              |       |       |                          |       |        |  |      |              |       |       |                          |       |        |  |      |              |       |       |                          |       |        |  |      |              |      |      |                            |  |  |  |             |                     |               |           |                             |  |  |  |             |                     |           |               |
| 2021-10-28_to_2021-11-10                             | -0.58                                                                                                                                                                                                                                                                                                                                                                                                                                                                                                                                                                                                                                                                                                                                                                                                                                                                                                                                                                                                                                                                                                                                                                                                                                                                                                                                                                                                                                                                                                                                                                                                                                                                                                                                                                                                                                                                                                                           | 0.2202 |              | 0.56        | [0.36; 0.86]        | 22.9%           | 22.9%           |                 |                 |                          |       |        |  |      |              |      |      |                          |       |        |  |      |              |       |       |                          |       |        |  |      |              |       |       |                          |       |        |  |      |              |       |       |                          |       |        |  |      |              |       |       |                          |       |        |  |      |              |       |       |                          |       |        |  |      |              |       |       |                          |       |        |  |      |              |      |      |                            |  |  |  |             |                     |               |           |                             |  |  |  |             |                     |           |               |
| 2021-11-11_to_2021-11-24                             | -0.18                                                                                                                                                                                                                                                                                                                                                                                                                                                                                                                                                                                                                                                                                                                                                                                                                                                                                                                                                                                                                                                                                                                                                                                                                                                                                                                                                                                                                                                                                                                                                                                                                                                                                                                                                                                                                                                                                                                           | 0.2661 |              | 0.83        | [0.49; 1.40]        | 15.7%           | 15.7%           |                 |                 |                          |       |        |  |      |              |      |      |                          |       |        |  |      |              |       |       |                          |       |        |  |      |              |       |       |                          |       |        |  |      |              |       |       |                          |       |        |  |      |              |       |       |                          |       |        |  |      |              |       |       |                          |       |        |  |      |              |       |       |                          |       |        |  |      |              |      |      |                            |  |  |  |             |                     |               |           |                             |  |  |  |             |                     |           |               |
| 2021-11-25_to_2021-12-08                             | -0.51                                                                                                                                                                                                                                                                                                                                                                                                                                                                                                                                                                                                                                                                                                                                                                                                                                                                                                                                                                                                                                                                                                                                                                                                                                                                                                                                                                                                                                                                                                                                                                                                                                                                                                                                                                                                                                                                                                                           | 0.2753 |              | 0.60        | [0.35; 1.03]        | 14.7%           | 14.7%           |                 |                 |                          |       |        |  |      |              |      |      |                          |       |        |  |      |              |       |       |                          |       |        |  |      |              |       |       |                          |       |        |  |      |              |       |       |                          |       |        |  |      |              |       |       |                          |       |        |  |      |              |       |       |                          |       |        |  |      |              |       |       |                          |       |        |  |      |              |      |      |                            |  |  |  |             |                     |               |           |                             |  |  |  |             |                     |           |               |
| 2021-12-09_to_2021-12-22                             | -0.43                                                                                                                                                                                                                                                                                                                                                                                                                                                                                                                                                                                                                                                                                                                                                                                                                                                                                                                                                                                                                                                                                                                                                                                                                                                                                                                                                                                                                                                                                                                                                                                                                                                                                                                                                                                                                                                                                                                           | 0.2680 |              | 0.65        | [0.38; 1.10]        | 15.5%           | 15.5%           |                 |                 |                          |       |        |  |      |              |      |      |                          |       |        |  |      |              |       |       |                          |       |        |  |      |              |       |       |                          |       |        |  |      |              |       |       |                          |       |        |  |      |              |       |       |                          |       |        |  |      |              |       |       |                          |       |        |  |      |              |       |       |                          |       |        |  |      |              |      |      |                            |  |  |  |             |                     |               |           |                             |  |  |  |             |                     |           |               |
| 2021-12-23_to_2022-01-05                             | -0.66                                                                                                                                                                                                                                                                                                                                                                                                                                                                                                                                                                                                                                                                                                                                                                                                                                                                                                                                                                                                                                                                                                                                                                                                                                                                                                                                                                                                                                                                                                                                                                                                                                                                                                                                                                                                                                                                                                                           | 0.7641 |              | 0.51        | [0.12; 2.30]        | 1.9%            | 1.9%            |                 |                 |                          |       |        |  |      |              |      |      |                          |       |        |  |      |              |       |       |                          |       |        |  |      |              |       |       |                          |       |        |  |      |              |       |       |                          |       |        |  |      |              |       |       |                          |       |        |  |      |              |       |       |                          |       |        |  |      |              |       |       |                          |       |        |  |      |              |      |      |                            |  |  |  |             |                     |               |           |                             |  |  |  |             |                     |           |               |
| <b>Common effect model</b>                           |                                                                                                                                                                                                                                                                                                                                                                                                                                                                                                                                                                                                                                                                                                                                                                                                                                                                                                                                                                                                                                                                                                                                                                                                                                                                                                                                                                                                                                                                                                                                                                                                                                                                                                                                                                                                                                                                                                                                 |        |              | <b>0.68</b> | <b>[0.55; 0.84]</b> | <b>100.0%</b>   | <b>--</b>       |                 |                 |                          |       |        |  |      |              |      |      |                          |       |        |  |      |              |       |       |                          |       |        |  |      |              |       |       |                          |       |        |  |      |              |       |       |                          |       |        |  |      |              |       |       |                          |       |        |  |      |              |       |       |                          |       |        |  |      |              |       |       |                          |       |        |  |      |              |      |      |                            |  |  |  |             |                     |               |           |                             |  |  |  |             |                     |           |               |
| <b>Random effects model</b>                          |                                                                                                                                                                                                                                                                                                                                                                                                                                                                                                                                                                                                                                                                                                                                                                                                                                                                                                                                                                                                                                                                                                                                                                                                                                                                                                                                                                                                                                                                                                                                                                                                                                                                                                                                                                                                                                                                                                                                 |        |              | <b>0.68</b> | <b>[0.55; 0.84]</b> | <b>--</b>       | <b>100.0%</b>   |                 |                 |                          |       |        |  |      |              |      |      |                          |       |        |  |      |              |       |       |                          |       |        |  |      |              |       |       |                          |       |        |  |      |              |       |       |                          |       |        |  |      |              |       |       |                          |       |        |  |      |              |       |       |                          |       |        |  |      |              |       |       |                          |       |        |  |      |              |      |      |                            |  |  |  |             |                     |               |           |                             |  |  |  |             |                     |           |               |
| <p>IMD Quintile 4 in reference to IMD Quintile 1</p> | <table border="1"> <thead> <tr> <th>Study</th> <th>TE</th> <th>seTE</th> <th>Hazard Ratio</th> <th>HR</th> <th>95%-CI</th> <th>Weight (common)</th> <th>Weight (random)</th> </tr> </thead> <tbody> <tr><td>2021-09-16_to_2021-09-29</td><td>0.39</td><td>0.6139</td><td></td><td>1.48</td><td>[0.44; 4.92]</td><td>2.7%</td><td>3.6%</td></tr> <tr><td>2021-09-30_to_2021-10-13</td><td>0.00</td><td>0.3113</td><td></td><td>1.00</td><td>[0.55; 1.85]</td><td>10.5%</td><td>11.6%</td></tr> <tr><td>2021-10-14_to_2021-10-27</td><td>-0.44</td><td>0.2565</td><td></td><td>0.64</td><td>[0.39; 1.06]</td><td>15.5%</td><td>15.6%</td></tr> <tr><td>2021-10-28_to_2021-11-10</td><td>-0.73</td><td>0.2138</td><td></td><td>0.48</td><td>[0.32; 0.73]</td><td>22.3%</td><td>19.9%</td></tr> <tr><td>2021-11-11_to_2021-11-24</td><td>0.01</td><td>0.2562</td><td></td><td>1.01</td><td>[0.61; 1.67]</td><td>15.5%</td><td>15.6%</td></tr> <tr><td>2021-11-25_to_2021-12-08</td><td>-0.32</td><td>0.2551</td><td></td><td>0.73</td><td>[0.44; 1.20]</td><td>15.7%</td><td>15.7%</td></tr> <tr><td>2021-12-09_to_2021-12-22</td><td>-0.43</td><td>0.2496</td><td></td><td>0.65</td><td>[0.40; 1.06]</td><td>16.4%</td><td>16.2%</td></tr> <tr><td>2021-12-23_to_2022-01-05</td><td>-1.26</td><td>0.8665</td><td></td><td>0.28</td><td>[0.05; 1.55]</td><td>1.4%</td><td>1.9%</td></tr> <tr><td><b>Common effect model</b></td><td></td><td></td><td></td><td><b>0.70</b></td><td><b>[0.58; 0.85]</b></td><td><b>100.0%</b></td><td><b>--</b></td></tr> <tr><td><b>Random effects model</b></td><td></td><td></td><td></td><td><b>0.71</b></td><td><b>[0.56; 0.90]</b></td><td><b>--</b></td><td><b>100.0%</b></td></tr> </tbody> </table> <p>Heterogeneity: <math>I^2 = 25\%</math>, <math>\tau^2 = 0.0267</math>, <math>p = 0.23</math></p>  | Study  | TE           | seTE        | Hazard Ratio        | HR              | 95%-CI          | Weight (common) | Weight (random) | 2021-09-16_to_2021-09-29 | 0.39  | 0.6139 |  | 1.48 | [0.44; 4.92] | 2.7% | 3.6% | 2021-09-30_to_2021-10-13 | 0.00  | 0.3113 |  | 1.00 | [0.55; 1.85] | 10.5% | 11.6% | 2021-10-14_to_2021-10-27 | -0.44 | 0.2565 |  | 0.64 | [0.39; 1.06] | 15.5% | 15.6% | 2021-10-28_to_2021-11-10 | -0.73 | 0.2138 |  | 0.48 | [0.32; 0.73] | 22.3% | 19.9% | 2021-11-11_to_2021-11-24 | 0.01  | 0.2562 |  | 1.01 | [0.61; 1.67] | 15.5% | 15.6% | 2021-11-25_to_2021-12-08 | -0.32 | 0.2551 |  | 0.73 | [0.44; 1.20] | 15.7% | 15.7% | 2021-12-09_to_2021-12-22 | -0.43 | 0.2496 |  | 0.65 | [0.40; 1.06] | 16.4% | 16.2% | 2021-12-23_to_2022-01-05 | -1.26 | 0.8665 |  | 0.28 | [0.05; 1.55] | 1.4% | 1.9% | <b>Common effect model</b> |  |  |  | <b>0.70</b> | <b>[0.58; 0.85]</b> | <b>100.0%</b> | <b>--</b> | <b>Random effects model</b> |  |  |  | <b>0.71</b> | <b>[0.56; 0.90]</b> | <b>--</b> | <b>100.0%</b> |
| Study                                                | TE                                                                                                                                                                                                                                                                                                                                                                                                                                                                                                                                                                                                                                                                                                                                                                                                                                                                                                                                                                                                                                                                                                                                                                                                                                                                                                                                                                                                                                                                                                                                                                                                                                                                                                                                                                                                                                                                                                                              | seTE   | Hazard Ratio | HR          | 95%-CI              | Weight (common) | Weight (random) |                 |                 |                          |       |        |  |      |              |      |      |                          |       |        |  |      |              |       |       |                          |       |        |  |      |              |       |       |                          |       |        |  |      |              |       |       |                          |       |        |  |      |              |       |       |                          |       |        |  |      |              |       |       |                          |       |        |  |      |              |       |       |                          |       |        |  |      |              |      |      |                            |  |  |  |             |                     |               |           |                             |  |  |  |             |                     |           |               |
| 2021-09-16_to_2021-09-29                             | 0.39                                                                                                                                                                                                                                                                                                                                                                                                                                                                                                                                                                                                                                                                                                                                                                                                                                                                                                                                                                                                                                                                                                                                                                                                                                                                                                                                                                                                                                                                                                                                                                                                                                                                                                                                                                                                                                                                                                                            | 0.6139 |              | 1.48        | [0.44; 4.92]        | 2.7%            | 3.6%            |                 |                 |                          |       |        |  |      |              |      |      |                          |       |        |  |      |              |       |       |                          |       |        |  |      |              |       |       |                          |       |        |  |      |              |       |       |                          |       |        |  |      |              |       |       |                          |       |        |  |      |              |       |       |                          |       |        |  |      |              |       |       |                          |       |        |  |      |              |      |      |                            |  |  |  |             |                     |               |           |                             |  |  |  |             |                     |           |               |
| 2021-09-30_to_2021-10-13                             | 0.00                                                                                                                                                                                                                                                                                                                                                                                                                                                                                                                                                                                                                                                                                                                                                                                                                                                                                                                                                                                                                                                                                                                                                                                                                                                                                                                                                                                                                                                                                                                                                                                                                                                                                                                                                                                                                                                                                                                            | 0.3113 |              | 1.00        | [0.55; 1.85]        | 10.5%           | 11.6%           |                 |                 |                          |       |        |  |      |              |      |      |                          |       |        |  |      |              |       |       |                          |       |        |  |      |              |       |       |                          |       |        |  |      |              |       |       |                          |       |        |  |      |              |       |       |                          |       |        |  |      |              |       |       |                          |       |        |  |      |              |       |       |                          |       |        |  |      |              |      |      |                            |  |  |  |             |                     |               |           |                             |  |  |  |             |                     |           |               |
| 2021-10-14_to_2021-10-27                             | -0.44                                                                                                                                                                                                                                                                                                                                                                                                                                                                                                                                                                                                                                                                                                                                                                                                                                                                                                                                                                                                                                                                                                                                                                                                                                                                                                                                                                                                                                                                                                                                                                                                                                                                                                                                                                                                                                                                                                                           | 0.2565 |              | 0.64        | [0.39; 1.06]        | 15.5%           | 15.6%           |                 |                 |                          |       |        |  |      |              |      |      |                          |       |        |  |      |              |       |       |                          |       |        |  |      |              |       |       |                          |       |        |  |      |              |       |       |                          |       |        |  |      |              |       |       |                          |       |        |  |      |              |       |       |                          |       |        |  |      |              |       |       |                          |       |        |  |      |              |      |      |                            |  |  |  |             |                     |               |           |                             |  |  |  |             |                     |           |               |
| 2021-10-28_to_2021-11-10                             | -0.73                                                                                                                                                                                                                                                                                                                                                                                                                                                                                                                                                                                                                                                                                                                                                                                                                                                                                                                                                                                                                                                                                                                                                                                                                                                                                                                                                                                                                                                                                                                                                                                                                                                                                                                                                                                                                                                                                                                           | 0.2138 |              | 0.48        | [0.32; 0.73]        | 22.3%           | 19.9%           |                 |                 |                          |       |        |  |      |              |      |      |                          |       |        |  |      |              |       |       |                          |       |        |  |      |              |       |       |                          |       |        |  |      |              |       |       |                          |       |        |  |      |              |       |       |                          |       |        |  |      |              |       |       |                          |       |        |  |      |              |       |       |                          |       |        |  |      |              |      |      |                            |  |  |  |             |                     |               |           |                             |  |  |  |             |                     |           |               |
| 2021-11-11_to_2021-11-24                             | 0.01                                                                                                                                                                                                                                                                                                                                                                                                                                                                                                                                                                                                                                                                                                                                                                                                                                                                                                                                                                                                                                                                                                                                                                                                                                                                                                                                                                                                                                                                                                                                                                                                                                                                                                                                                                                                                                                                                                                            | 0.2562 |              | 1.01        | [0.61; 1.67]        | 15.5%           | 15.6%           |                 |                 |                          |       |        |  |      |              |      |      |                          |       |        |  |      |              |       |       |                          |       |        |  |      |              |       |       |                          |       |        |  |      |              |       |       |                          |       |        |  |      |              |       |       |                          |       |        |  |      |              |       |       |                          |       |        |  |      |              |       |       |                          |       |        |  |      |              |      |      |                            |  |  |  |             |                     |               |           |                             |  |  |  |             |                     |           |               |
| 2021-11-25_to_2021-12-08                             | -0.32                                                                                                                                                                                                                                                                                                                                                                                                                                                                                                                                                                                                                                                                                                                                                                                                                                                                                                                                                                                                                                                                                                                                                                                                                                                                                                                                                                                                                                                                                                                                                                                                                                                                                                                                                                                                                                                                                                                           | 0.2551 |              | 0.73        | [0.44; 1.20]        | 15.7%           | 15.7%           |                 |                 |                          |       |        |  |      |              |      |      |                          |       |        |  |      |              |       |       |                          |       |        |  |      |              |       |       |                          |       |        |  |      |              |       |       |                          |       |        |  |      |              |       |       |                          |       |        |  |      |              |       |       |                          |       |        |  |      |              |       |       |                          |       |        |  |      |              |      |      |                            |  |  |  |             |                     |               |           |                             |  |  |  |             |                     |           |               |
| 2021-12-09_to_2021-12-22                             | -0.43                                                                                                                                                                                                                                                                                                                                                                                                                                                                                                                                                                                                                                                                                                                                                                                                                                                                                                                                                                                                                                                                                                                                                                                                                                                                                                                                                                                                                                                                                                                                                                                                                                                                                                                                                                                                                                                                                                                           | 0.2496 |              | 0.65        | [0.40; 1.06]        | 16.4%           | 16.2%           |                 |                 |                          |       |        |  |      |              |      |      |                          |       |        |  |      |              |       |       |                          |       |        |  |      |              |       |       |                          |       |        |  |      |              |       |       |                          |       |        |  |      |              |       |       |                          |       |        |  |      |              |       |       |                          |       |        |  |      |              |       |       |                          |       |        |  |      |              |      |      |                            |  |  |  |             |                     |               |           |                             |  |  |  |             |                     |           |               |
| 2021-12-23_to_2022-01-05                             | -1.26                                                                                                                                                                                                                                                                                                                                                                                                                                                                                                                                                                                                                                                                                                                                                                                                                                                                                                                                                                                                                                                                                                                                                                                                                                                                                                                                                                                                                                                                                                                                                                                                                                                                                                                                                                                                                                                                                                                           | 0.8665 |              | 0.28        | [0.05; 1.55]        | 1.4%            | 1.9%            |                 |                 |                          |       |        |  |      |              |      |      |                          |       |        |  |      |              |       |       |                          |       |        |  |      |              |       |       |                          |       |        |  |      |              |       |       |                          |       |        |  |      |              |       |       |                          |       |        |  |      |              |       |       |                          |       |        |  |      |              |       |       |                          |       |        |  |      |              |      |      |                            |  |  |  |             |                     |               |           |                             |  |  |  |             |                     |           |               |
| <b>Common effect model</b>                           |                                                                                                                                                                                                                                                                                                                                                                                                                                                                                                                                                                                                                                                                                                                                                                                                                                                                                                                                                                                                                                                                                                                                                                                                                                                                                                                                                                                                                                                                                                                                                                                                                                                                                                                                                                                                                                                                                                                                 |        |              | <b>0.70</b> | <b>[0.58; 0.85]</b> | <b>100.0%</b>   | <b>--</b>       |                 |                 |                          |       |        |  |      |              |      |      |                          |       |        |  |      |              |       |       |                          |       |        |  |      |              |       |       |                          |       |        |  |      |              |       |       |                          |       |        |  |      |              |       |       |                          |       |        |  |      |              |       |       |                          |       |        |  |      |              |       |       |                          |       |        |  |      |              |      |      |                            |  |  |  |             |                     |               |           |                             |  |  |  |             |                     |           |               |
| <b>Random effects model</b>                          |                                                                                                                                                                                                                                                                                                                                                                                                                                                                                                                                                                                                                                                                                                                                                                                                                                                                                                                                                                                                                                                                                                                                                                                                                                                                                                                                                                                                                                                                                                                                                                                                                                                                                                                                                                                                                                                                                                                                 |        |              | <b>0.71</b> | <b>[0.56; 0.90]</b> | <b>--</b>       | <b>100.0%</b>   |                 |                 |                          |       |        |  |      |              |      |      |                          |       |        |  |      |              |       |       |                          |       |        |  |      |              |       |       |                          |       |        |  |      |              |       |       |                          |       |        |  |      |              |       |       |                          |       |        |  |      |              |       |       |                          |       |        |  |      |              |       |       |                          |       |        |  |      |              |      |      |                            |  |  |  |             |                     |               |           |                             |  |  |  |             |                     |           |               |
| <p>IMD Quintile 5 in reference to IMD Quintile 1</p> | <table border="1"> <thead> <tr> <th>Study</th> <th>TE</th> <th>seTE</th> <th>Hazard Ratio</th> <th>HR</th> <th>95%-CI</th> <th>Weight (common)</th> <th>Weight (random)</th> </tr> </thead> <tbody> <tr><td>2021-09-16_to_2021-09-29</td><td>-0.13</td><td>0.6325</td><td></td><td>0.88</td><td>[0.25; 3.03]</td><td>2.4%</td><td>2.4%</td></tr> <tr><td>2021-09-30_to_2021-10-13</td><td>-0.05</td><td>0.3059</td><td></td><td>0.95</td><td>[0.52; 1.74]</td><td>10.3%</td><td>10.3%</td></tr> <tr><td>2021-10-14_to_2021-10-27</td><td>-0.37</td><td>0.2488</td><td></td><td>0.69</td><td>[0.42; 1.12]</td><td>15.6%</td><td>15.6%</td></tr> <tr><td>2021-10-28_to_2021-11-10</td><td>-0.46</td><td>0.1981</td><td></td><td>0.63</td><td>[0.43; 0.93]</td><td>24.6%</td><td>24.6%</td></tr> <tr><td>2021-11-11_to_2021-11-24</td><td>-0.19</td><td>0.2549</td><td></td><td>0.82</td><td>[0.50; 1.36]</td><td>14.8%</td><td>14.8%</td></tr> <tr><td>2021-11-25_to_2021-12-08</td><td>-0.72</td><td>0.2644</td><td></td><td>0.49</td><td>[0.29; 0.81]</td><td>13.8%</td><td>13.8%</td></tr> <tr><td>2021-12-09_to_2021-12-22</td><td>-0.22</td><td>0.2410</td><td></td><td>0.80</td><td>[0.50; 1.29]</td><td>16.6%</td><td>16.6%</td></tr> <tr><td>2021-12-23_to_2022-01-05</td><td>-0.53</td><td>0.7075</td><td></td><td>0.59</td><td>[0.15; 2.36]</td><td>1.9%</td><td>1.9%</td></tr> <tr><td><b>Common effect model</b></td><td></td><td></td><td></td><td><b>0.70</b></td><td><b>[0.58; 0.85]</b></td><td><b>100.0%</b></td><td><b>--</b></td></tr> <tr><td><b>Random effects model</b></td><td></td><td></td><td></td><td><b>0.70</b></td><td><b>[0.58; 0.85]</b></td><td><b>--</b></td><td><b>100.0%</b></td></tr> </tbody> </table> <p>Heterogeneity: <math>I^2 = 0\%</math>, <math>\tau^2 = 0</math>, <math>p = 0.76</math></p>     | Study  | TE           | seTE        | Hazard Ratio        | HR              | 95%-CI          | Weight (common) | Weight (random) | 2021-09-16_to_2021-09-29 | -0.13 | 0.6325 |  | 0.88 | [0.25; 3.03] | 2.4% | 2.4% | 2021-09-30_to_2021-10-13 | -0.05 | 0.3059 |  | 0.95 | [0.52; 1.74] | 10.3% | 10.3% | 2021-10-14_to_2021-10-27 | -0.37 | 0.2488 |  | 0.69 | [0.42; 1.12] | 15.6% | 15.6% | 2021-10-28_to_2021-11-10 | -0.46 | 0.1981 |  | 0.63 | [0.43; 0.93] | 24.6% | 24.6% | 2021-11-11_to_2021-11-24 | -0.19 | 0.2549 |  | 0.82 | [0.50; 1.36] | 14.8% | 14.8% | 2021-11-25_to_2021-12-08 | -0.72 | 0.2644 |  | 0.49 | [0.29; 0.81] | 13.8% | 13.8% | 2021-12-09_to_2021-12-22 | -0.22 | 0.2410 |  | 0.80 | [0.50; 1.29] | 16.6% | 16.6% | 2021-12-23_to_2022-01-05 | -0.53 | 0.7075 |  | 0.59 | [0.15; 2.36] | 1.9% | 1.9% | <b>Common effect model</b> |  |  |  | <b>0.70</b> | <b>[0.58; 0.85]</b> | <b>100.0%</b> | <b>--</b> | <b>Random effects model</b> |  |  |  | <b>0.70</b> | <b>[0.58; 0.85]</b> | <b>--</b> | <b>100.0%</b> |
| Study                                                | TE                                                                                                                                                                                                                                                                                                                                                                                                                                                                                                                                                                                                                                                                                                                                                                                                                                                                                                                                                                                                                                                                                                                                                                                                                                                                                                                                                                                                                                                                                                                                                                                                                                                                                                                                                                                                                                                                                                                              | seTE   | Hazard Ratio | HR          | 95%-CI              | Weight (common) | Weight (random) |                 |                 |                          |       |        |  |      |              |      |      |                          |       |        |  |      |              |       |       |                          |       |        |  |      |              |       |       |                          |       |        |  |      |              |       |       |                          |       |        |  |      |              |       |       |                          |       |        |  |      |              |       |       |                          |       |        |  |      |              |       |       |                          |       |        |  |      |              |      |      |                            |  |  |  |             |                     |               |           |                             |  |  |  |             |                     |           |               |
| 2021-09-16_to_2021-09-29                             | -0.13                                                                                                                                                                                                                                                                                                                                                                                                                                                                                                                                                                                                                                                                                                                                                                                                                                                                                                                                                                                                                                                                                                                                                                                                                                                                                                                                                                                                                                                                                                                                                                                                                                                                                                                                                                                                                                                                                                                           | 0.6325 |              | 0.88        | [0.25; 3.03]        | 2.4%            | 2.4%            |                 |                 |                          |       |        |  |      |              |      |      |                          |       |        |  |      |              |       |       |                          |       |        |  |      |              |       |       |                          |       |        |  |      |              |       |       |                          |       |        |  |      |              |       |       |                          |       |        |  |      |              |       |       |                          |       |        |  |      |              |       |       |                          |       |        |  |      |              |      |      |                            |  |  |  |             |                     |               |           |                             |  |  |  |             |                     |           |               |
| 2021-09-30_to_2021-10-13                             | -0.05                                                                                                                                                                                                                                                                                                                                                                                                                                                                                                                                                                                                                                                                                                                                                                                                                                                                                                                                                                                                                                                                                                                                                                                                                                                                                                                                                                                                                                                                                                                                                                                                                                                                                                                                                                                                                                                                                                                           | 0.3059 |              | 0.95        | [0.52; 1.74]        | 10.3%           | 10.3%           |                 |                 |                          |       |        |  |      |              |      |      |                          |       |        |  |      |              |       |       |                          |       |        |  |      |              |       |       |                          |       |        |  |      |              |       |       |                          |       |        |  |      |              |       |       |                          |       |        |  |      |              |       |       |                          |       |        |  |      |              |       |       |                          |       |        |  |      |              |      |      |                            |  |  |  |             |                     |               |           |                             |  |  |  |             |                     |           |               |
| 2021-10-14_to_2021-10-27                             | -0.37                                                                                                                                                                                                                                                                                                                                                                                                                                                                                                                                                                                                                                                                                                                                                                                                                                                                                                                                                                                                                                                                                                                                                                                                                                                                                                                                                                                                                                                                                                                                                                                                                                                                                                                                                                                                                                                                                                                           | 0.2488 |              | 0.69        | [0.42; 1.12]        | 15.6%           | 15.6%           |                 |                 |                          |       |        |  |      |              |      |      |                          |       |        |  |      |              |       |       |                          |       |        |  |      |              |       |       |                          |       |        |  |      |              |       |       |                          |       |        |  |      |              |       |       |                          |       |        |  |      |              |       |       |                          |       |        |  |      |              |       |       |                          |       |        |  |      |              |      |      |                            |  |  |  |             |                     |               |           |                             |  |  |  |             |                     |           |               |
| 2021-10-28_to_2021-11-10                             | -0.46                                                                                                                                                                                                                                                                                                                                                                                                                                                                                                                                                                                                                                                                                                                                                                                                                                                                                                                                                                                                                                                                                                                                                                                                                                                                                                                                                                                                                                                                                                                                                                                                                                                                                                                                                                                                                                                                                                                           | 0.1981 |              | 0.63        | [0.43; 0.93]        | 24.6%           | 24.6%           |                 |                 |                          |       |        |  |      |              |      |      |                          |       |        |  |      |              |       |       |                          |       |        |  |      |              |       |       |                          |       |        |  |      |              |       |       |                          |       |        |  |      |              |       |       |                          |       |        |  |      |              |       |       |                          |       |        |  |      |              |       |       |                          |       |        |  |      |              |      |      |                            |  |  |  |             |                     |               |           |                             |  |  |  |             |                     |           |               |
| 2021-11-11_to_2021-11-24                             | -0.19                                                                                                                                                                                                                                                                                                                                                                                                                                                                                                                                                                                                                                                                                                                                                                                                                                                                                                                                                                                                                                                                                                                                                                                                                                                                                                                                                                                                                                                                                                                                                                                                                                                                                                                                                                                                                                                                                                                           | 0.2549 |              | 0.82        | [0.50; 1.36]        | 14.8%           | 14.8%           |                 |                 |                          |       |        |  |      |              |      |      |                          |       |        |  |      |              |       |       |                          |       |        |  |      |              |       |       |                          |       |        |  |      |              |       |       |                          |       |        |  |      |              |       |       |                          |       |        |  |      |              |       |       |                          |       |        |  |      |              |       |       |                          |       |        |  |      |              |      |      |                            |  |  |  |             |                     |               |           |                             |  |  |  |             |                     |           |               |
| 2021-11-25_to_2021-12-08                             | -0.72                                                                                                                                                                                                                                                                                                                                                                                                                                                                                                                                                                                                                                                                                                                                                                                                                                                                                                                                                                                                                                                                                                                                                                                                                                                                                                                                                                                                                                                                                                                                                                                                                                                                                                                                                                                                                                                                                                                           | 0.2644 |              | 0.49        | [0.29; 0.81]        | 13.8%           | 13.8%           |                 |                 |                          |       |        |  |      |              |      |      |                          |       |        |  |      |              |       |       |                          |       |        |  |      |              |       |       |                          |       |        |  |      |              |       |       |                          |       |        |  |      |              |       |       |                          |       |        |  |      |              |       |       |                          |       |        |  |      |              |       |       |                          |       |        |  |      |              |      |      |                            |  |  |  |             |                     |               |           |                             |  |  |  |             |                     |           |               |
| 2021-12-09_to_2021-12-22                             | -0.22                                                                                                                                                                                                                                                                                                                                                                                                                                                                                                                                                                                                                                                                                                                                                                                                                                                                                                                                                                                                                                                                                                                                                                                                                                                                                                                                                                                                                                                                                                                                                                                                                                                                                                                                                                                                                                                                                                                           | 0.2410 |              | 0.80        | [0.50; 1.29]        | 16.6%           | 16.6%           |                 |                 |                          |       |        |  |      |              |      |      |                          |       |        |  |      |              |       |       |                          |       |        |  |      |              |       |       |                          |       |        |  |      |              |       |       |                          |       |        |  |      |              |       |       |                          |       |        |  |      |              |       |       |                          |       |        |  |      |              |       |       |                          |       |        |  |      |              |      |      |                            |  |  |  |             |                     |               |           |                             |  |  |  |             |                     |           |               |
| 2021-12-23_to_2022-01-05                             | -0.53                                                                                                                                                                                                                                                                                                                                                                                                                                                                                                                                                                                                                                                                                                                                                                                                                                                                                                                                                                                                                                                                                                                                                                                                                                                                                                                                                                                                                                                                                                                                                                                                                                                                                                                                                                                                                                                                                                                           | 0.7075 |              | 0.59        | [0.15; 2.36]        | 1.9%            | 1.9%            |                 |                 |                          |       |        |  |      |              |      |      |                          |       |        |  |      |              |       |       |                          |       |        |  |      |              |       |       |                          |       |        |  |      |              |       |       |                          |       |        |  |      |              |       |       |                          |       |        |  |      |              |       |       |                          |       |        |  |      |              |       |       |                          |       |        |  |      |              |      |      |                            |  |  |  |             |                     |               |           |                             |  |  |  |             |                     |           |               |
| <b>Common effect model</b>                           |                                                                                                                                                                                                                                                                                                                                                                                                                                                                                                                                                                                                                                                                                                                                                                                                                                                                                                                                                                                                                                                                                                                                                                                                                                                                                                                                                                                                                                                                                                                                                                                                                                                                                                                                                                                                                                                                                                                                 |        |              | <b>0.70</b> | <b>[0.58; 0.85]</b> | <b>100.0%</b>   | <b>--</b>       |                 |                 |                          |       |        |  |      |              |      |      |                          |       |        |  |      |              |       |       |                          |       |        |  |      |              |       |       |                          |       |        |  |      |              |       |       |                          |       |        |  |      |              |       |       |                          |       |        |  |      |              |       |       |                          |       |        |  |      |              |       |       |                          |       |        |  |      |              |      |      |                            |  |  |  |             |                     |               |           |                             |  |  |  |             |                     |           |               |
| <b>Random effects model</b>                          |                                                                                                                                                                                                                                                                                                                                                                                                                                                                                                                                                                                                                                                                                                                                                                                                                                                                                                                                                                                                                                                                                                                                                                                                                                                                                                                                                                                                                                                                                                                                                                                                                                                                                                                                                                                                                                                                                                                                 |        |              | <b>0.70</b> | <b>[0.58; 0.85]</b> | <b>--</b>       | <b>100.0%</b>   |                 |                 |                          |       |        |  |      |              |      |      |                          |       |        |  |      |              |       |       |                          |       |        |  |      |              |       |       |                          |       |        |  |      |              |       |       |                          |       |        |  |      |              |       |       |                          |       |        |  |      |              |       |       |                          |       |        |  |      |              |       |       |                          |       |        |  |      |              |      |      |                            |  |  |  |             |                     |               |           |                             |  |  |  |             |                     |           |               |

|                             | <p>Ethnic Group</p> <p>(Minority Ethnic in reference to White British)</p>                | <table border="1"> <thead> <tr> <th>Study</th> <th>TE</th> <th>seTE</th> <th>Hazard Ratio</th> <th>HR</th> <th>95%-CI</th> <th>Weight (common)</th> <th>Weight (random)</th> </tr> </thead> <tbody> <tr><td>2021-09-16_to_2021-09-29</td><td>-0.05</td><td>0.3998</td><td></td><td>0.95</td><td>[0.44; 2.09]</td><td>4.0%</td><td>4.0%</td></tr> <tr><td>2021-09-30_to_2021-10-13</td><td>-0.09</td><td>0.2691</td><td></td><td>0.91</td><td>[0.54; 1.54]</td><td>8.7%</td><td>8.7%</td></tr> <tr><td>2021-10-14_to_2021-10-27</td><td>0.42</td><td>0.2161</td><td></td><td>1.52</td><td>[0.99; 2.32]</td><td>13.6%</td><td>13.6%</td></tr> <tr><td>2021-10-28_to_2021-11-10</td><td>0.49</td><td>0.1842</td><td></td><td>1.63</td><td>[1.13; 2.33]</td><td>18.7%</td><td>18.7%</td></tr> <tr><td>2021-11-11_to_2021-11-24</td><td>0.54</td><td>0.1882</td><td></td><td>1.71</td><td>[1.18; 2.48]</td><td>17.9%</td><td>17.9%</td></tr> <tr><td>2021-11-25_to_2021-12-08</td><td>0.45</td><td>0.2118</td><td></td><td>1.57</td><td>[1.04; 2.38]</td><td>14.1%</td><td>14.1%</td></tr> <tr><td>2021-12-09_to_2021-12-22</td><td>0.47</td><td>0.1700</td><td></td><td>1.61</td><td>[1.15; 2.24]</td><td>21.9%</td><td>21.9%</td></tr> <tr><td>2021-12-23_to_2022-01-05</td><td>-0.69</td><td>0.7528</td><td></td><td>0.50</td><td>[0.11; 2.19]</td><td>1.1%</td><td>1.1%</td></tr> <tr><td><b>Common effect model</b></td><td></td><td></td><td></td><td><b>1.48</b></td><td><b>[1.27; 1.73]</b></td><td><b>100.0%</b></td><td><b>--</b></td></tr> <tr><td><b>Random effects model</b></td><td></td><td></td><td></td><td><b>1.48</b></td><td><b>[1.27; 1.73]</b></td><td><b>--</b></td><td><b>100.0%</b></td></tr> </tbody> </table> <p>Heterogeneity: <math>I^2 = 9\%</math>, <math>\tau^2 &lt; 0.0001</math>, <math>p = 0.36</math></p>      | Study        | TE          | seTE                | Hazard Ratio    | HR              | 95%-CI | Weight (common) | Weight (random) | 2021-09-16_to_2021-09-29 | -0.05 | 0.3998 |  | 0.95 | [0.44; 2.09] | 4.0% | 4.0% | 2021-09-30_to_2021-10-13 | -0.09 | 0.2691 |  | 0.91 | [0.54; 1.54] | 8.7%  | 8.7%  | 2021-10-14_to_2021-10-27 | 0.42  | 0.2161 |  | 1.52 | [0.99; 2.32] | 13.6% | 13.6% | 2021-10-28_to_2021-11-10 | 0.49  | 0.1842 |  | 1.63 | [1.13; 2.33] | 18.7% | 18.7% | 2021-11-11_to_2021-11-24 | 0.54  | 0.1882 |  | 1.71 | [1.18; 2.48] | 17.9% | 17.9% | 2021-11-25_to_2021-12-08 | 0.45  | 0.2118 |  | 1.57 | [1.04; 2.38] | 14.1% | 14.1% | 2021-12-09_to_2021-12-22 | 0.47 | 0.1700 |  | 1.61 | [1.15; 2.24] | 21.9% | 21.9% | 2021-12-23_to_2022-01-05 | -0.69 | 0.7528 |  | 0.50 | [0.11; 2.19] | 1.1% | 1.1% | <b>Common effect model</b> |  |  |  | <b>1.48</b> | <b>[1.27; 1.73]</b> | <b>100.0%</b> | <b>--</b> | <b>Random effects model</b> |  |  |  | <b>1.48</b> | <b>[1.27; 1.73]</b> | <b>--</b> | <b>100.0%</b> |
|-----------------------------|-------------------------------------------------------------------------------------------|-----------------------------------------------------------------------------------------------------------------------------------------------------------------------------------------------------------------------------------------------------------------------------------------------------------------------------------------------------------------------------------------------------------------------------------------------------------------------------------------------------------------------------------------------------------------------------------------------------------------------------------------------------------------------------------------------------------------------------------------------------------------------------------------------------------------------------------------------------------------------------------------------------------------------------------------------------------------------------------------------------------------------------------------------------------------------------------------------------------------------------------------------------------------------------------------------------------------------------------------------------------------------------------------------------------------------------------------------------------------------------------------------------------------------------------------------------------------------------------------------------------------------------------------------------------------------------------------------------------------------------------------------------------------------------------------------------------------------------------------------------------------------------------------------------------------------------------------------|--------------|-------------|---------------------|-----------------|-----------------|--------|-----------------|-----------------|--------------------------|-------|--------|--|------|--------------|------|------|--------------------------|-------|--------|--|------|--------------|-------|-------|--------------------------|-------|--------|--|------|--------------|-------|-------|--------------------------|-------|--------|--|------|--------------|-------|-------|--------------------------|-------|--------|--|------|--------------|-------|-------|--------------------------|-------|--------|--|------|--------------|-------|-------|--------------------------|------|--------|--|------|--------------|-------|-------|--------------------------|-------|--------|--|------|--------------|------|------|----------------------------|--|--|--|-------------|---------------------|---------------|-----------|-----------------------------|--|--|--|-------------|---------------------|-----------|---------------|
| Study                       | TE                                                                                        | seTE                                                                                                                                                                                                                                                                                                                                                                                                                                                                                                                                                                                                                                                                                                                                                                                                                                                                                                                                                                                                                                                                                                                                                                                                                                                                                                                                                                                                                                                                                                                                                                                                                                                                                                                                                                                                                                          | Hazard Ratio | HR          | 95%-CI              | Weight (common) | Weight (random) |        |                 |                 |                          |       |        |  |      |              |      |      |                          |       |        |  |      |              |       |       |                          |       |        |  |      |              |       |       |                          |       |        |  |      |              |       |       |                          |       |        |  |      |              |       |       |                          |       |        |  |      |              |       |       |                          |      |        |  |      |              |       |       |                          |       |        |  |      |              |      |      |                            |  |  |  |             |                     |               |           |                             |  |  |  |             |                     |           |               |
| 2021-09-16_to_2021-09-29    | -0.05                                                                                     | 0.3998                                                                                                                                                                                                                                                                                                                                                                                                                                                                                                                                                                                                                                                                                                                                                                                                                                                                                                                                                                                                                                                                                                                                                                                                                                                                                                                                                                                                                                                                                                                                                                                                                                                                                                                                                                                                                                        |              | 0.95        | [0.44; 2.09]        | 4.0%            | 4.0%            |        |                 |                 |                          |       |        |  |      |              |      |      |                          |       |        |  |      |              |       |       |                          |       |        |  |      |              |       |       |                          |       |        |  |      |              |       |       |                          |       |        |  |      |              |       |       |                          |       |        |  |      |              |       |       |                          |      |        |  |      |              |       |       |                          |       |        |  |      |              |      |      |                            |  |  |  |             |                     |               |           |                             |  |  |  |             |                     |           |               |
| 2021-09-30_to_2021-10-13    | -0.09                                                                                     | 0.2691                                                                                                                                                                                                                                                                                                                                                                                                                                                                                                                                                                                                                                                                                                                                                                                                                                                                                                                                                                                                                                                                                                                                                                                                                                                                                                                                                                                                                                                                                                                                                                                                                                                                                                                                                                                                                                        |              | 0.91        | [0.54; 1.54]        | 8.7%            | 8.7%            |        |                 |                 |                          |       |        |  |      |              |      |      |                          |       |        |  |      |              |       |       |                          |       |        |  |      |              |       |       |                          |       |        |  |      |              |       |       |                          |       |        |  |      |              |       |       |                          |       |        |  |      |              |       |       |                          |      |        |  |      |              |       |       |                          |       |        |  |      |              |      |      |                            |  |  |  |             |                     |               |           |                             |  |  |  |             |                     |           |               |
| 2021-10-14_to_2021-10-27    | 0.42                                                                                      | 0.2161                                                                                                                                                                                                                                                                                                                                                                                                                                                                                                                                                                                                                                                                                                                                                                                                                                                                                                                                                                                                                                                                                                                                                                                                                                                                                                                                                                                                                                                                                                                                                                                                                                                                                                                                                                                                                                        |              | 1.52        | [0.99; 2.32]        | 13.6%           | 13.6%           |        |                 |                 |                          |       |        |  |      |              |      |      |                          |       |        |  |      |              |       |       |                          |       |        |  |      |              |       |       |                          |       |        |  |      |              |       |       |                          |       |        |  |      |              |       |       |                          |       |        |  |      |              |       |       |                          |      |        |  |      |              |       |       |                          |       |        |  |      |              |      |      |                            |  |  |  |             |                     |               |           |                             |  |  |  |             |                     |           |               |
| 2021-10-28_to_2021-11-10    | 0.49                                                                                      | 0.1842                                                                                                                                                                                                                                                                                                                                                                                                                                                                                                                                                                                                                                                                                                                                                                                                                                                                                                                                                                                                                                                                                                                                                                                                                                                                                                                                                                                                                                                                                                                                                                                                                                                                                                                                                                                                                                        |              | 1.63        | [1.13; 2.33]        | 18.7%           | 18.7%           |        |                 |                 |                          |       |        |  |      |              |      |      |                          |       |        |  |      |              |       |       |                          |       |        |  |      |              |       |       |                          |       |        |  |      |              |       |       |                          |       |        |  |      |              |       |       |                          |       |        |  |      |              |       |       |                          |      |        |  |      |              |       |       |                          |       |        |  |      |              |      |      |                            |  |  |  |             |                     |               |           |                             |  |  |  |             |                     |           |               |
| 2021-11-11_to_2021-11-24    | 0.54                                                                                      | 0.1882                                                                                                                                                                                                                                                                                                                                                                                                                                                                                                                                                                                                                                                                                                                                                                                                                                                                                                                                                                                                                                                                                                                                                                                                                                                                                                                                                                                                                                                                                                                                                                                                                                                                                                                                                                                                                                        |              | 1.71        | [1.18; 2.48]        | 17.9%           | 17.9%           |        |                 |                 |                          |       |        |  |      |              |      |      |                          |       |        |  |      |              |       |       |                          |       |        |  |      |              |       |       |                          |       |        |  |      |              |       |       |                          |       |        |  |      |              |       |       |                          |       |        |  |      |              |       |       |                          |      |        |  |      |              |       |       |                          |       |        |  |      |              |      |      |                            |  |  |  |             |                     |               |           |                             |  |  |  |             |                     |           |               |
| 2021-11-25_to_2021-12-08    | 0.45                                                                                      | 0.2118                                                                                                                                                                                                                                                                                                                                                                                                                                                                                                                                                                                                                                                                                                                                                                                                                                                                                                                                                                                                                                                                                                                                                                                                                                                                                                                                                                                                                                                                                                                                                                                                                                                                                                                                                                                                                                        |              | 1.57        | [1.04; 2.38]        | 14.1%           | 14.1%           |        |                 |                 |                          |       |        |  |      |              |      |      |                          |       |        |  |      |              |       |       |                          |       |        |  |      |              |       |       |                          |       |        |  |      |              |       |       |                          |       |        |  |      |              |       |       |                          |       |        |  |      |              |       |       |                          |      |        |  |      |              |       |       |                          |       |        |  |      |              |      |      |                            |  |  |  |             |                     |               |           |                             |  |  |  |             |                     |           |               |
| 2021-12-09_to_2021-12-22    | 0.47                                                                                      | 0.1700                                                                                                                                                                                                                                                                                                                                                                                                                                                                                                                                                                                                                                                                                                                                                                                                                                                                                                                                                                                                                                                                                                                                                                                                                                                                                                                                                                                                                                                                                                                                                                                                                                                                                                                                                                                                                                        |              | 1.61        | [1.15; 2.24]        | 21.9%           | 21.9%           |        |                 |                 |                          |       |        |  |      |              |      |      |                          |       |        |  |      |              |       |       |                          |       |        |  |      |              |       |       |                          |       |        |  |      |              |       |       |                          |       |        |  |      |              |       |       |                          |       |        |  |      |              |       |       |                          |      |        |  |      |              |       |       |                          |       |        |  |      |              |      |      |                            |  |  |  |             |                     |               |           |                             |  |  |  |             |                     |           |               |
| 2021-12-23_to_2022-01-05    | -0.69                                                                                     | 0.7528                                                                                                                                                                                                                                                                                                                                                                                                                                                                                                                                                                                                                                                                                                                                                                                                                                                                                                                                                                                                                                                                                                                                                                                                                                                                                                                                                                                                                                                                                                                                                                                                                                                                                                                                                                                                                                        |              | 0.50        | [0.11; 2.19]        | 1.1%            | 1.1%            |        |                 |                 |                          |       |        |  |      |              |      |      |                          |       |        |  |      |              |       |       |                          |       |        |  |      |              |       |       |                          |       |        |  |      |              |       |       |                          |       |        |  |      |              |       |       |                          |       |        |  |      |              |       |       |                          |      |        |  |      |              |       |       |                          |       |        |  |      |              |      |      |                            |  |  |  |             |                     |               |           |                             |  |  |  |             |                     |           |               |
| <b>Common effect model</b>  |                                                                                           |                                                                                                                                                                                                                                                                                                                                                                                                                                                                                                                                                                                                                                                                                                                                                                                                                                                                                                                                                                                                                                                                                                                                                                                                                                                                                                                                                                                                                                                                                                                                                                                                                                                                                                                                                                                                                                               |              | <b>1.48</b> | <b>[1.27; 1.73]</b> | <b>100.0%</b>   | <b>--</b>       |        |                 |                 |                          |       |        |  |      |              |      |      |                          |       |        |  |      |              |       |       |                          |       |        |  |      |              |       |       |                          |       |        |  |      |              |       |       |                          |       |        |  |      |              |       |       |                          |       |        |  |      |              |       |       |                          |      |        |  |      |              |       |       |                          |       |        |  |      |              |      |      |                            |  |  |  |             |                     |               |           |                             |  |  |  |             |                     |           |               |
| <b>Random effects model</b> |                                                                                           |                                                                                                                                                                                                                                                                                                                                                                                                                                                                                                                                                                                                                                                                                                                                                                                                                                                                                                                                                                                                                                                                                                                                                                                                                                                                                                                                                                                                                                                                                                                                                                                                                                                                                                                                                                                                                                               |              | <b>1.48</b> | <b>[1.27; 1.73]</b> | <b>--</b>       | <b>100.0%</b>   |        |                 |                 |                          |       |        |  |      |              |      |      |                          |       |        |  |      |              |       |       |                          |       |        |  |      |              |       |       |                          |       |        |  |      |              |       |       |                          |       |        |  |      |              |       |       |                          |       |        |  |      |              |       |       |                          |      |        |  |      |              |       |       |                          |       |        |  |      |              |      |      |                            |  |  |  |             |                     |               |           |                             |  |  |  |             |                     |           |               |
|                             | <p>Sex (Female in reference to male)</p>                                                  | <table border="1"> <thead> <tr> <th>Study</th> <th>TE</th> <th>seTE</th> <th>Hazard Ratio</th> <th>HR</th> <th>95%-CI</th> <th>Weight (common)</th> <th>Weight (random)</th> </tr> </thead> <tbody> <tr><td>2021-09-16_to_2021-09-29</td><td>0.62</td><td>0.2764</td><td></td><td>1.86</td><td>[1.08; 3.20]</td><td>3.7%</td><td>3.7%</td></tr> <tr><td>2021-09-30_to_2021-10-13</td><td>0.10</td><td>0.1487</td><td></td><td>1.11</td><td>[0.83; 1.48]</td><td>12.8%</td><td>12.8%</td></tr> <tr><td>2021-10-14_to_2021-10-27</td><td>-0.20</td><td>0.1339</td><td></td><td>0.82</td><td>[0.63; 1.07]</td><td>15.7%</td><td>15.7%</td></tr> <tr><td>2021-10-28_to_2021-11-10</td><td>-0.16</td><td>0.1138</td><td></td><td>0.85</td><td>[0.68; 1.07]</td><td>21.8%</td><td>21.8%</td></tr> <tr><td>2021-11-11_to_2021-11-24</td><td>-0.10</td><td>0.1216</td><td></td><td>0.90</td><td>[0.71; 1.15]</td><td>19.1%</td><td>19.1%</td></tr> <tr><td>2021-11-25_to_2021-12-08</td><td>-0.07</td><td>0.1485</td><td></td><td>0.93</td><td>[0.70; 1.25]</td><td>12.8%</td><td>12.8%</td></tr> <tr><td>2021-12-09_to_2021-12-22</td><td>0.02</td><td>0.1477</td><td></td><td>1.02</td><td>[0.76; 1.36]</td><td>12.9%</td><td>12.9%</td></tr> <tr><td>2021-12-23_to_2022-01-05</td><td>-0.01</td><td>0.4879</td><td></td><td>0.99</td><td>[0.38; 2.59]</td><td>1.2%</td><td>1.2%</td></tr> <tr><td><b>Common effect model</b></td><td></td><td></td><td></td><td><b>0.95</b></td><td><b>[0.85; 1.05]</b></td><td><b>100.0%</b></td><td><b>--</b></td></tr> <tr><td><b>Random effects model</b></td><td></td><td></td><td></td><td><b>0.95</b></td><td><b>[0.85; 1.05]</b></td><td><b>--</b></td><td><b>100.0%</b></td></tr> </tbody> </table> <p>Heterogeneity: <math>I^2 = 26\%</math>, <math>\tau^2 &lt; 0.0001</math>, <math>p = 0.22</math></p> | Study        | TE          | seTE                | Hazard Ratio    | HR              | 95%-CI | Weight (common) | Weight (random) | 2021-09-16_to_2021-09-29 | 0.62  | 0.2764 |  | 1.86 | [1.08; 3.20] | 3.7% | 3.7% | 2021-09-30_to_2021-10-13 | 0.10  | 0.1487 |  | 1.11 | [0.83; 1.48] | 12.8% | 12.8% | 2021-10-14_to_2021-10-27 | -0.20 | 0.1339 |  | 0.82 | [0.63; 1.07] | 15.7% | 15.7% | 2021-10-28_to_2021-11-10 | -0.16 | 0.1138 |  | 0.85 | [0.68; 1.07] | 21.8% | 21.8% | 2021-11-11_to_2021-11-24 | -0.10 | 0.1216 |  | 0.90 | [0.71; 1.15] | 19.1% | 19.1% | 2021-11-25_to_2021-12-08 | -0.07 | 0.1485 |  | 0.93 | [0.70; 1.25] | 12.8% | 12.8% | 2021-12-09_to_2021-12-22 | 0.02 | 0.1477 |  | 1.02 | [0.76; 1.36] | 12.9% | 12.9% | 2021-12-23_to_2022-01-05 | -0.01 | 0.4879 |  | 0.99 | [0.38; 2.59] | 1.2% | 1.2% | <b>Common effect model</b> |  |  |  | <b>0.95</b> | <b>[0.85; 1.05]</b> | <b>100.0%</b> | <b>--</b> | <b>Random effects model</b> |  |  |  | <b>0.95</b> | <b>[0.85; 1.05]</b> | <b>--</b> | <b>100.0%</b> |
| Study                       | TE                                                                                        | seTE                                                                                                                                                                                                                                                                                                                                                                                                                                                                                                                                                                                                                                                                                                                                                                                                                                                                                                                                                                                                                                                                                                                                                                                                                                                                                                                                                                                                                                                                                                                                                                                                                                                                                                                                                                                                                                          | Hazard Ratio | HR          | 95%-CI              | Weight (common) | Weight (random) |        |                 |                 |                          |       |        |  |      |              |      |      |                          |       |        |  |      |              |       |       |                          |       |        |  |      |              |       |       |                          |       |        |  |      |              |       |       |                          |       |        |  |      |              |       |       |                          |       |        |  |      |              |       |       |                          |      |        |  |      |              |       |       |                          |       |        |  |      |              |      |      |                            |  |  |  |             |                     |               |           |                             |  |  |  |             |                     |           |               |
| 2021-09-16_to_2021-09-29    | 0.62                                                                                      | 0.2764                                                                                                                                                                                                                                                                                                                                                                                                                                                                                                                                                                                                                                                                                                                                                                                                                                                                                                                                                                                                                                                                                                                                                                                                                                                                                                                                                                                                                                                                                                                                                                                                                                                                                                                                                                                                                                        |              | 1.86        | [1.08; 3.20]        | 3.7%            | 3.7%            |        |                 |                 |                          |       |        |  |      |              |      |      |                          |       |        |  |      |              |       |       |                          |       |        |  |      |              |       |       |                          |       |        |  |      |              |       |       |                          |       |        |  |      |              |       |       |                          |       |        |  |      |              |       |       |                          |      |        |  |      |              |       |       |                          |       |        |  |      |              |      |      |                            |  |  |  |             |                     |               |           |                             |  |  |  |             |                     |           |               |
| 2021-09-30_to_2021-10-13    | 0.10                                                                                      | 0.1487                                                                                                                                                                                                                                                                                                                                                                                                                                                                                                                                                                                                                                                                                                                                                                                                                                                                                                                                                                                                                                                                                                                                                                                                                                                                                                                                                                                                                                                                                                                                                                                                                                                                                                                                                                                                                                        |              | 1.11        | [0.83; 1.48]        | 12.8%           | 12.8%           |        |                 |                 |                          |       |        |  |      |              |      |      |                          |       |        |  |      |              |       |       |                          |       |        |  |      |              |       |       |                          |       |        |  |      |              |       |       |                          |       |        |  |      |              |       |       |                          |       |        |  |      |              |       |       |                          |      |        |  |      |              |       |       |                          |       |        |  |      |              |      |      |                            |  |  |  |             |                     |               |           |                             |  |  |  |             |                     |           |               |
| 2021-10-14_to_2021-10-27    | -0.20                                                                                     | 0.1339                                                                                                                                                                                                                                                                                                                                                                                                                                                                                                                                                                                                                                                                                                                                                                                                                                                                                                                                                                                                                                                                                                                                                                                                                                                                                                                                                                                                                                                                                                                                                                                                                                                                                                                                                                                                                                        |              | 0.82        | [0.63; 1.07]        | 15.7%           | 15.7%           |        |                 |                 |                          |       |        |  |      |              |      |      |                          |       |        |  |      |              |       |       |                          |       |        |  |      |              |       |       |                          |       |        |  |      |              |       |       |                          |       |        |  |      |              |       |       |                          |       |        |  |      |              |       |       |                          |      |        |  |      |              |       |       |                          |       |        |  |      |              |      |      |                            |  |  |  |             |                     |               |           |                             |  |  |  |             |                     |           |               |
| 2021-10-28_to_2021-11-10    | -0.16                                                                                     | 0.1138                                                                                                                                                                                                                                                                                                                                                                                                                                                                                                                                                                                                                                                                                                                                                                                                                                                                                                                                                                                                                                                                                                                                                                                                                                                                                                                                                                                                                                                                                                                                                                                                                                                                                                                                                                                                                                        |              | 0.85        | [0.68; 1.07]        | 21.8%           | 21.8%           |        |                 |                 |                          |       |        |  |      |              |      |      |                          |       |        |  |      |              |       |       |                          |       |        |  |      |              |       |       |                          |       |        |  |      |              |       |       |                          |       |        |  |      |              |       |       |                          |       |        |  |      |              |       |       |                          |      |        |  |      |              |       |       |                          |       |        |  |      |              |      |      |                            |  |  |  |             |                     |               |           |                             |  |  |  |             |                     |           |               |
| 2021-11-11_to_2021-11-24    | -0.10                                                                                     | 0.1216                                                                                                                                                                                                                                                                                                                                                                                                                                                                                                                                                                                                                                                                                                                                                                                                                                                                                                                                                                                                                                                                                                                                                                                                                                                                                                                                                                                                                                                                                                                                                                                                                                                                                                                                                                                                                                        |              | 0.90        | [0.71; 1.15]        | 19.1%           | 19.1%           |        |                 |                 |                          |       |        |  |      |              |      |      |                          |       |        |  |      |              |       |       |                          |       |        |  |      |              |       |       |                          |       |        |  |      |              |       |       |                          |       |        |  |      |              |       |       |                          |       |        |  |      |              |       |       |                          |      |        |  |      |              |       |       |                          |       |        |  |      |              |      |      |                            |  |  |  |             |                     |               |           |                             |  |  |  |             |                     |           |               |
| 2021-11-25_to_2021-12-08    | -0.07                                                                                     | 0.1485                                                                                                                                                                                                                                                                                                                                                                                                                                                                                                                                                                                                                                                                                                                                                                                                                                                                                                                                                                                                                                                                                                                                                                                                                                                                                                                                                                                                                                                                                                                                                                                                                                                                                                                                                                                                                                        |              | 0.93        | [0.70; 1.25]        | 12.8%           | 12.8%           |        |                 |                 |                          |       |        |  |      |              |      |      |                          |       |        |  |      |              |       |       |                          |       |        |  |      |              |       |       |                          |       |        |  |      |              |       |       |                          |       |        |  |      |              |       |       |                          |       |        |  |      |              |       |       |                          |      |        |  |      |              |       |       |                          |       |        |  |      |              |      |      |                            |  |  |  |             |                     |               |           |                             |  |  |  |             |                     |           |               |
| 2021-12-09_to_2021-12-22    | 0.02                                                                                      | 0.1477                                                                                                                                                                                                                                                                                                                                                                                                                                                                                                                                                                                                                                                                                                                                                                                                                                                                                                                                                                                                                                                                                                                                                                                                                                                                                                                                                                                                                                                                                                                                                                                                                                                                                                                                                                                                                                        |              | 1.02        | [0.76; 1.36]        | 12.9%           | 12.9%           |        |                 |                 |                          |       |        |  |      |              |      |      |                          |       |        |  |      |              |       |       |                          |       |        |  |      |              |       |       |                          |       |        |  |      |              |       |       |                          |       |        |  |      |              |       |       |                          |       |        |  |      |              |       |       |                          |      |        |  |      |              |       |       |                          |       |        |  |      |              |      |      |                            |  |  |  |             |                     |               |           |                             |  |  |  |             |                     |           |               |
| 2021-12-23_to_2022-01-05    | -0.01                                                                                     | 0.4879                                                                                                                                                                                                                                                                                                                                                                                                                                                                                                                                                                                                                                                                                                                                                                                                                                                                                                                                                                                                                                                                                                                                                                                                                                                                                                                                                                                                                                                                                                                                                                                                                                                                                                                                                                                                                                        |              | 0.99        | [0.38; 2.59]        | 1.2%            | 1.2%            |        |                 |                 |                          |       |        |  |      |              |      |      |                          |       |        |  |      |              |       |       |                          |       |        |  |      |              |       |       |                          |       |        |  |      |              |       |       |                          |       |        |  |      |              |       |       |                          |       |        |  |      |              |       |       |                          |      |        |  |      |              |       |       |                          |       |        |  |      |              |      |      |                            |  |  |  |             |                     |               |           |                             |  |  |  |             |                     |           |               |
| <b>Common effect model</b>  |                                                                                           |                                                                                                                                                                                                                                                                                                                                                                                                                                                                                                                                                                                                                                                                                                                                                                                                                                                                                                                                                                                                                                                                                                                                                                                                                                                                                                                                                                                                                                                                                                                                                                                                                                                                                                                                                                                                                                               |              | <b>0.95</b> | <b>[0.85; 1.05]</b> | <b>100.0%</b>   | <b>--</b>       |        |                 |                 |                          |       |        |  |      |              |      |      |                          |       |        |  |      |              |       |       |                          |       |        |  |      |              |       |       |                          |       |        |  |      |              |       |       |                          |       |        |  |      |              |       |       |                          |       |        |  |      |              |       |       |                          |      |        |  |      |              |       |       |                          |       |        |  |      |              |      |      |                            |  |  |  |             |                     |               |           |                             |  |  |  |             |                     |           |               |
| <b>Random effects model</b> |                                                                                           |                                                                                                                                                                                                                                                                                                                                                                                                                                                                                                                                                                                                                                                                                                                                                                                                                                                                                                                                                                                                                                                                                                                                                                                                                                                                                                                                                                                                                                                                                                                                                                                                                                                                                                                                                                                                                                               |              | <b>0.95</b> | <b>[0.85; 1.05]</b> | <b>--</b>       | <b>100.0%</b>   |        |                 |                 |                          |       |        |  |      |              |      |      |                          |       |        |  |      |              |       |       |                          |       |        |  |      |              |       |       |                          |       |        |  |      |              |       |       |                          |       |        |  |      |              |       |       |                          |       |        |  |      |              |       |       |                          |      |        |  |      |              |       |       |                          |       |        |  |      |              |      |      |                            |  |  |  |             |                     |               |           |                             |  |  |  |             |                     |           |               |
| Adjusted                    | <p>Vaccine type - Oxford AstraZeneca ChAdOx1 in reference to Pfizer BioNTech BNT162b2</p> | <table border="1"> <thead> <tr> <th>Study</th> <th>TE</th> <th>seTE</th> <th>Hazard Ratio</th> <th>HR</th> <th>95%-CI</th> <th>Weight (common)</th> <th>Weight (random)</th> </tr> </thead> <tbody> <tr><td>2021-09-16_to_2021-09-29</td><td>-0.16</td><td>0.3464</td><td></td><td>0.85</td><td>[0.43; 1.68]</td><td>3.0%</td><td>3.0%</td></tr> <tr><td>2021-09-30_to_2021-10-13</td><td>-0.02</td><td>0.1542</td><td></td><td>0.98</td><td>[0.72; 1.32]</td><td>15.0%</td><td>15.0%</td></tr> <tr><td>2021-10-14_to_2021-10-27</td><td>-0.18</td><td>0.1355</td><td></td><td>0.84</td><td>[0.64; 1.09]</td><td>19.4%</td><td>19.4%</td></tr> <tr><td>2021-10-28_to_2021-11-10</td><td>-0.04</td><td>0.1167</td><td></td><td>0.96</td><td>[0.77; 1.21]</td><td>26.1%</td><td>26.1%</td></tr> <tr><td>2021-11-11_to_2021-11-24</td><td>0.06</td><td>0.1425</td><td></td><td>1.06</td><td>[0.81; 1.41]</td><td>17.5%</td><td>17.5%</td></tr> <tr><td>2021-11-25_to_2021-12-08</td><td>-0.00</td><td>0.2137</td><td></td><td>1.00</td><td>[0.66; 1.52]</td><td>7.8%</td><td>7.8%</td></tr> <tr><td>2021-12-09_to_2021-12-22</td><td>0.29</td><td>0.1851</td><td></td><td>1.33</td><td>[0.93; 1.92]</td><td>10.4%</td><td>10.4%</td></tr> <tr><td>2021-12-23_to_2022-01-05</td><td>0.35</td><td>0.6162</td><td></td><td>1.42</td><td>[0.42; 4.76]</td><td>0.9%</td><td>0.9%</td></tr> <tr><td><b>Common effect model</b></td><td></td><td></td><td></td><td><b>0.99</b></td><td><b>[0.88; 1.11]</b></td><td><b>100.0%</b></td><td><b>--</b></td></tr> <tr><td><b>Random effects model</b></td><td></td><td></td><td></td><td><b>0.99</b></td><td><b>[0.88; 1.11]</b></td><td><b>--</b></td><td><b>100.0%</b></td></tr> </tbody> </table> <p>Heterogeneity: <math>I^2 = 0\%</math>, <math>\tau^2 = 0</math>, <math>p = 0.66</math></p>            | Study        | TE          | seTE                | Hazard Ratio    | HR              | 95%-CI | Weight (common) | Weight (random) | 2021-09-16_to_2021-09-29 | -0.16 | 0.3464 |  | 0.85 | [0.43; 1.68] | 3.0% | 3.0% | 2021-09-30_to_2021-10-13 | -0.02 | 0.1542 |  | 0.98 | [0.72; 1.32] | 15.0% | 15.0% | 2021-10-14_to_2021-10-27 | -0.18 | 0.1355 |  | 0.84 | [0.64; 1.09] | 19.4% | 19.4% | 2021-10-28_to_2021-11-10 | -0.04 | 0.1167 |  | 0.96 | [0.77; 1.21] | 26.1% | 26.1% | 2021-11-11_to_2021-11-24 | 0.06  | 0.1425 |  | 1.06 | [0.81; 1.41] | 17.5% | 17.5% | 2021-11-25_to_2021-12-08 | -0.00 | 0.2137 |  | 1.00 | [0.66; 1.52] | 7.8%  | 7.8%  | 2021-12-09_to_2021-12-22 | 0.29 | 0.1851 |  | 1.33 | [0.93; 1.92] | 10.4% | 10.4% | 2021-12-23_to_2022-01-05 | 0.35  | 0.6162 |  | 1.42 | [0.42; 4.76] | 0.9% | 0.9% | <b>Common effect model</b> |  |  |  | <b>0.99</b> | <b>[0.88; 1.11]</b> | <b>100.0%</b> | <b>--</b> | <b>Random effects model</b> |  |  |  | <b>0.99</b> | <b>[0.88; 1.11]</b> | <b>--</b> | <b>100.0%</b> |
| Study                       | TE                                                                                        | seTE                                                                                                                                                                                                                                                                                                                                                                                                                                                                                                                                                                                                                                                                                                                                                                                                                                                                                                                                                                                                                                                                                                                                                                                                                                                                                                                                                                                                                                                                                                                                                                                                                                                                                                                                                                                                                                          | Hazard Ratio | HR          | 95%-CI              | Weight (common) | Weight (random) |        |                 |                 |                          |       |        |  |      |              |      |      |                          |       |        |  |      |              |       |       |                          |       |        |  |      |              |       |       |                          |       |        |  |      |              |       |       |                          |       |        |  |      |              |       |       |                          |       |        |  |      |              |       |       |                          |      |        |  |      |              |       |       |                          |       |        |  |      |              |      |      |                            |  |  |  |             |                     |               |           |                             |  |  |  |             |                     |           |               |
| 2021-09-16_to_2021-09-29    | -0.16                                                                                     | 0.3464                                                                                                                                                                                                                                                                                                                                                                                                                                                                                                                                                                                                                                                                                                                                                                                                                                                                                                                                                                                                                                                                                                                                                                                                                                                                                                                                                                                                                                                                                                                                                                                                                                                                                                                                                                                                                                        |              | 0.85        | [0.43; 1.68]        | 3.0%            | 3.0%            |        |                 |                 |                          |       |        |  |      |              |      |      |                          |       |        |  |      |              |       |       |                          |       |        |  |      |              |       |       |                          |       |        |  |      |              |       |       |                          |       |        |  |      |              |       |       |                          |       |        |  |      |              |       |       |                          |      |        |  |      |              |       |       |                          |       |        |  |      |              |      |      |                            |  |  |  |             |                     |               |           |                             |  |  |  |             |                     |           |               |
| 2021-09-30_to_2021-10-13    | -0.02                                                                                     | 0.1542                                                                                                                                                                                                                                                                                                                                                                                                                                                                                                                                                                                                                                                                                                                                                                                                                                                                                                                                                                                                                                                                                                                                                                                                                                                                                                                                                                                                                                                                                                                                                                                                                                                                                                                                                                                                                                        |              | 0.98        | [0.72; 1.32]        | 15.0%           | 15.0%           |        |                 |                 |                          |       |        |  |      |              |      |      |                          |       |        |  |      |              |       |       |                          |       |        |  |      |              |       |       |                          |       |        |  |      |              |       |       |                          |       |        |  |      |              |       |       |                          |       |        |  |      |              |       |       |                          |      |        |  |      |              |       |       |                          |       |        |  |      |              |      |      |                            |  |  |  |             |                     |               |           |                             |  |  |  |             |                     |           |               |
| 2021-10-14_to_2021-10-27    | -0.18                                                                                     | 0.1355                                                                                                                                                                                                                                                                                                                                                                                                                                                                                                                                                                                                                                                                                                                                                                                                                                                                                                                                                                                                                                                                                                                                                                                                                                                                                                                                                                                                                                                                                                                                                                                                                                                                                                                                                                                                                                        |              | 0.84        | [0.64; 1.09]        | 19.4%           | 19.4%           |        |                 |                 |                          |       |        |  |      |              |      |      |                          |       |        |  |      |              |       |       |                          |       |        |  |      |              |       |       |                          |       |        |  |      |              |       |       |                          |       |        |  |      |              |       |       |                          |       |        |  |      |              |       |       |                          |      |        |  |      |              |       |       |                          |       |        |  |      |              |      |      |                            |  |  |  |             |                     |               |           |                             |  |  |  |             |                     |           |               |
| 2021-10-28_to_2021-11-10    | -0.04                                                                                     | 0.1167                                                                                                                                                                                                                                                                                                                                                                                                                                                                                                                                                                                                                                                                                                                                                                                                                                                                                                                                                                                                                                                                                                                                                                                                                                                                                                                                                                                                                                                                                                                                                                                                                                                                                                                                                                                                                                        |              | 0.96        | [0.77; 1.21]        | 26.1%           | 26.1%           |        |                 |                 |                          |       |        |  |      |              |      |      |                          |       |        |  |      |              |       |       |                          |       |        |  |      |              |       |       |                          |       |        |  |      |              |       |       |                          |       |        |  |      |              |       |       |                          |       |        |  |      |              |       |       |                          |      |        |  |      |              |       |       |                          |       |        |  |      |              |      |      |                            |  |  |  |             |                     |               |           |                             |  |  |  |             |                     |           |               |
| 2021-11-11_to_2021-11-24    | 0.06                                                                                      | 0.1425                                                                                                                                                                                                                                                                                                                                                                                                                                                                                                                                                                                                                                                                                                                                                                                                                                                                                                                                                                                                                                                                                                                                                                                                                                                                                                                                                                                                                                                                                                                                                                                                                                                                                                                                                                                                                                        |              | 1.06        | [0.81; 1.41]        | 17.5%           | 17.5%           |        |                 |                 |                          |       |        |  |      |              |      |      |                          |       |        |  |      |              |       |       |                          |       |        |  |      |              |       |       |                          |       |        |  |      |              |       |       |                          |       |        |  |      |              |       |       |                          |       |        |  |      |              |       |       |                          |      |        |  |      |              |       |       |                          |       |        |  |      |              |      |      |                            |  |  |  |             |                     |               |           |                             |  |  |  |             |                     |           |               |
| 2021-11-25_to_2021-12-08    | -0.00                                                                                     | 0.2137                                                                                                                                                                                                                                                                                                                                                                                                                                                                                                                                                                                                                                                                                                                                                                                                                                                                                                                                                                                                                                                                                                                                                                                                                                                                                                                                                                                                                                                                                                                                                                                                                                                                                                                                                                                                                                        |              | 1.00        | [0.66; 1.52]        | 7.8%            | 7.8%            |        |                 |                 |                          |       |        |  |      |              |      |      |                          |       |        |  |      |              |       |       |                          |       |        |  |      |              |       |       |                          |       |        |  |      |              |       |       |                          |       |        |  |      |              |       |       |                          |       |        |  |      |              |       |       |                          |      |        |  |      |              |       |       |                          |       |        |  |      |              |      |      |                            |  |  |  |             |                     |               |           |                             |  |  |  |             |                     |           |               |
| 2021-12-09_to_2021-12-22    | 0.29                                                                                      | 0.1851                                                                                                                                                                                                                                                                                                                                                                                                                                                                                                                                                                                                                                                                                                                                                                                                                                                                                                                                                                                                                                                                                                                                                                                                                                                                                                                                                                                                                                                                                                                                                                                                                                                                                                                                                                                                                                        |              | 1.33        | [0.93; 1.92]        | 10.4%           | 10.4%           |        |                 |                 |                          |       |        |  |      |              |      |      |                          |       |        |  |      |              |       |       |                          |       |        |  |      |              |       |       |                          |       |        |  |      |              |       |       |                          |       |        |  |      |              |       |       |                          |       |        |  |      |              |       |       |                          |      |        |  |      |              |       |       |                          |       |        |  |      |              |      |      |                            |  |  |  |             |                     |               |           |                             |  |  |  |             |                     |           |               |
| 2021-12-23_to_2022-01-05    | 0.35                                                                                      | 0.6162                                                                                                                                                                                                                                                                                                                                                                                                                                                                                                                                                                                                                                                                                                                                                                                                                                                                                                                                                                                                                                                                                                                                                                                                                                                                                                                                                                                                                                                                                                                                                                                                                                                                                                                                                                                                                                        |              | 1.42        | [0.42; 4.76]        | 0.9%            | 0.9%            |        |                 |                 |                          |       |        |  |      |              |      |      |                          |       |        |  |      |              |       |       |                          |       |        |  |      |              |       |       |                          |       |        |  |      |              |       |       |                          |       |        |  |      |              |       |       |                          |       |        |  |      |              |       |       |                          |      |        |  |      |              |       |       |                          |       |        |  |      |              |      |      |                            |  |  |  |             |                     |               |           |                             |  |  |  |             |                     |           |               |
| <b>Common effect model</b>  |                                                                                           |                                                                                                                                                                                                                                                                                                                                                                                                                                                                                                                                                                                                                                                                                                                                                                                                                                                                                                                                                                                                                                                                                                                                                                                                                                                                                                                                                                                                                                                                                                                                                                                                                                                                                                                                                                                                                                               |              | <b>0.99</b> | <b>[0.88; 1.11]</b> | <b>100.0%</b>   | <b>--</b>       |        |                 |                 |                          |       |        |  |      |              |      |      |                          |       |        |  |      |              |       |       |                          |       |        |  |      |              |       |       |                          |       |        |  |      |              |       |       |                          |       |        |  |      |              |       |       |                          |       |        |  |      |              |       |       |                          |      |        |  |      |              |       |       |                          |       |        |  |      |              |      |      |                            |  |  |  |             |                     |               |           |                             |  |  |  |             |                     |           |               |
| <b>Random effects model</b> |                                                                                           |                                                                                                                                                                                                                                                                                                                                                                                                                                                                                                                                                                                                                                                                                                                                                                                                                                                                                                                                                                                                                                                                                                                                                                                                                                                                                                                                                                                                                                                                                                                                                                                                                                                                                                                                                                                                                                               |              | <b>0.99</b> | <b>[0.88; 1.11]</b> | <b>--</b>       | <b>100.0%</b>   |        |                 |                 |                          |       |        |  |      |              |      |      |                          |       |        |  |      |              |       |       |                          |       |        |  |      |              |       |       |                          |       |        |  |      |              |       |       |                          |       |        |  |      |              |       |       |                          |       |        |  |      |              |       |       |                          |      |        |  |      |              |       |       |                          |       |        |  |      |              |      |      |                            |  |  |  |             |                     |               |           |                             |  |  |  |             |                     |           |               |



# Supplementary Material

Supplementary Figure 1: Cohort recruitment diagram through time, including a description of time varying events

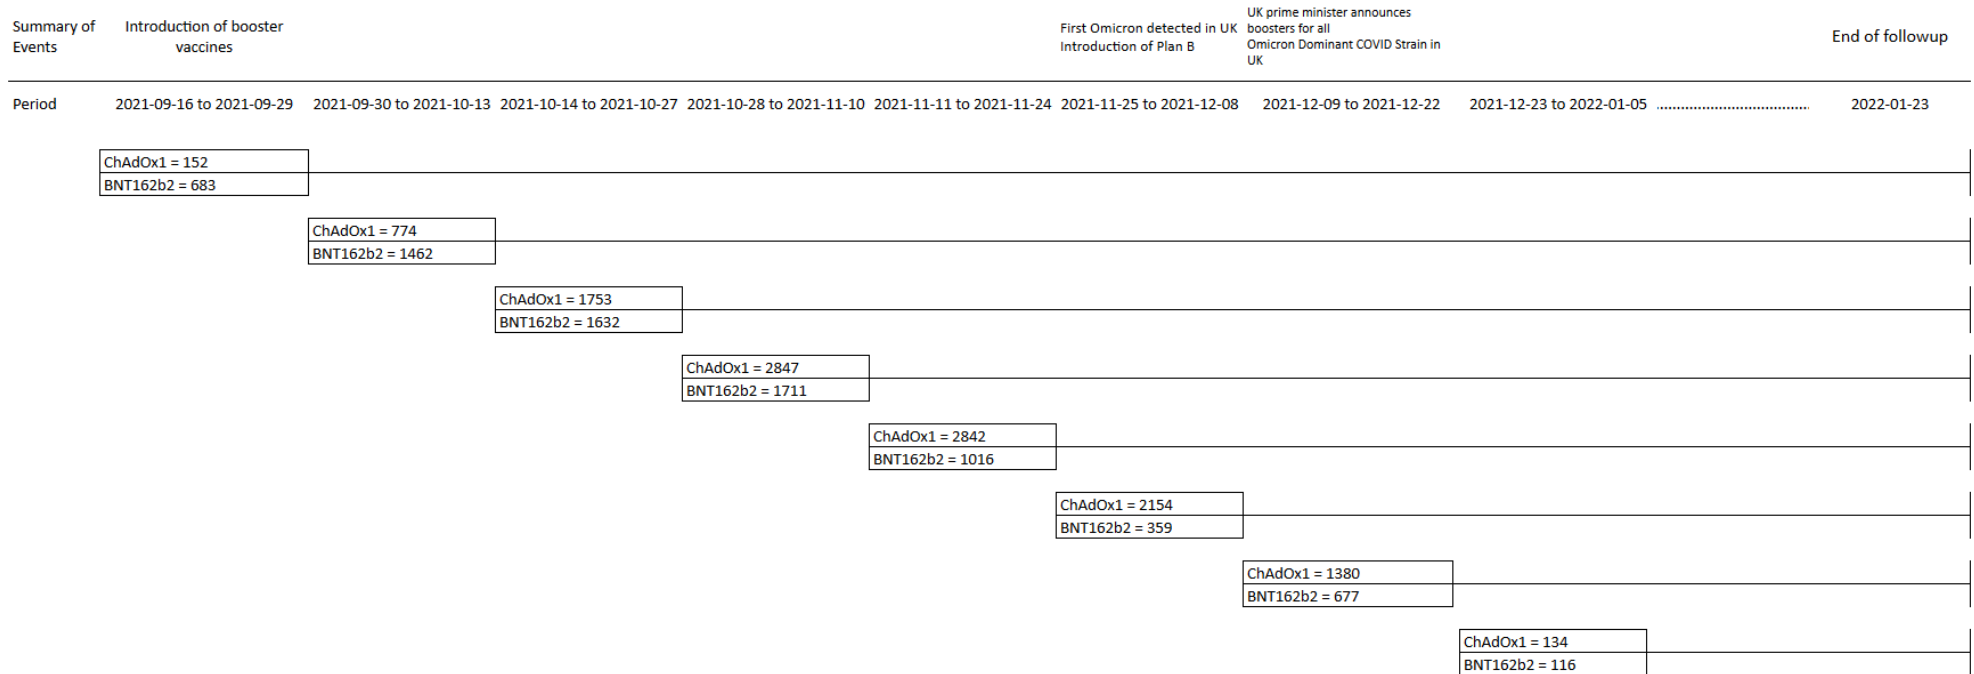



## Supplementary Material 2: Demographics breakdown of the sensitivity analysis

| Characteristic           | N      | Pfizer, N = 8,472 <sup>1</sup> | Oxford, N = 13,590 <sup>1</sup> | p-value <sup>2</sup> |
|--------------------------|--------|--------------------------------|---------------------------------|----------------------|
| <b>Age</b>               | 22,062 | 66 (55, 72)                    | 63 (55, 69)                     | <0.001               |
| <b>Region name</b>       | 22,062 |                                |                                 | <0.001               |
| East Midlands            |        | 808 (9.5%)                     | 1,291 (9.5%)                    |                      |
| East of England          |        | 1,866 (22%)                    | 2,898 (21%)                     |                      |
| London                   |        | 1,125 (13%)                    | 1,331 (9.8%)                    |                      |
| North East               |        | 355 (4.2%)                     | 747 (5.5%)                      |                      |
| North West               |        | 947 (11%)                      | 1,465 (11%)                     |                      |
| South East               |        | 1,596 (19%)                    | 2,691 (20%)                     |                      |
| South West               |        | 676 (8.0%)                     | 1,178 (8.7%)                    |                      |
| Wales                    |        | 206 (2.4%)                     | 333 (2.5%)                      |                      |
| West Midlands            |        | 464 (5.5%)                     | 862 (6.3%)                      |                      |
| Yorkshire and The Humber |        | 429 (5.1%)                     | 794 (5.8%)                      |                      |
| <b>IMD Quintile</b>      | 22,062 |                                |                                 | 0.7                  |
| (Most Deprived) 1        |        | 640 (7.6%)                     | 1,038 (7.6%)                    |                      |
| 2                        |        | 1,190 (14%)                    | 1,892 (14%)                     |                      |
| 3                        |        | 1,775 (21%)                    | 2,763 (20%)                     |                      |
| 4                        |        | 2,191 (26%)                    | 3,611 (27%)                     |                      |
| (Least Deprived) 5       |        | 2,676 (32%)                    | 4,286 (32%)                     |                      |
| <b>Sex</b>               | 22,062 |                                |                                 | 0.051                |
| Male                     |        | 3,616 (43%)                    | 5,983 (44%)                     |                      |
| Female                   |        | 4,856 (57%)                    | 7,607 (56%)                     |                      |
| <b>Ethnicity</b>         | 22,062 |                                |                                 |                      |
| White British            |        | 7,555 (89%)                    | 12,411 (91%)                    |                      |
| White Irish              |        | 136 (1.6%)                     | 189 (1.4%)                      |                      |

|                                                                                      |        |              |             |        |
|--------------------------------------------------------------------------------------|--------|--------------|-------------|--------|
| White Other                                                                          |        | 379 (4.5%)   | 521 (3.8%)  |        |
| Mixed                                                                                |        | 83 (1.0%)    | 108 (0.8%)  |        |
| South Asian                                                                          |        | 187 (2.2%)   | 209 (1.5%)  |        |
| Other Asian                                                                          |        | 64 (0.8%)    | 69 (0.5%)   |        |
| Black                                                                                |        | 33 (0.4%)    | 45 (0.3%)   |        |
| Other Ethnicity                                                                      |        | 35 (0.4%)    | 38 (0.3%)   |        |
| <b>Clinical Vulnerability</b>                                                        | 22,062 |              |             | <0.001 |
| Clinically extremely vulnerable                                                      |        | 1,203 (14%)  | 1,567 (12%) |        |
| Clinically vulnerable                                                                |        | 2,674 (32%)  | 3,919 (29%) |        |
| None Identified                                                                      |        | 4,595 (54%)  | 8,104 (60%) |        |
| <b>Followup Duration</b>                                                             | 22,062 | 83 (64, 100) | 67 (50, 82) | <0.001 |
| <b>SARs-CoV2-infection (Before booster)</b>                                          | 22,062 | 1,001 (12%)  | 1,799 (13%) | 0.002  |
| <b>SARs-CoV-2 infection (After booster)</b>                                          | 22,062 | 633 (7.5%)   | 947 (7.0%)  | 0.2    |
| <sup>1</sup> Median (IQR); n (%); Range                                              |        |              |             |        |
| <sup>2</sup> Wilcoxon rank sum test; Pearson's Chi-squared test; Fisher's exact test |        |              |             |        |

Supplementary Material 3 Adjusted and unadjusted random-effects meta-analysis for each covariate for the sensitivity analysis

| Adjustment                  | Covariate                                                                                   | Random Effects Meta-analysis for each covariate                                                                                                                                                                                                                                                                                                                                                                                                                                                                                                                                                                                                                                                                                                                                                                                                                                                                                                                                                                                                                                                                                                                                                                                                                                                                                                                                                                                                                                                                                                                                                                                                                                                                                                                                                                                               |              |             |                     |                 |                 |        |                 |                 |                          |       |        |  |      |              |      |      |                          |       |        |  |      |              |       |       |                          |       |        |  |      |              |       |       |                          |       |        |  |      |              |       |       |                          |       |        |  |      |              |       |       |                          |       |        |  |      |              |       |       |                          |       |        |  |      |              |       |       |                          |       |        |  |      |              |      |      |                            |  |  |  |             |                     |               |           |                             |  |  |  |             |                     |           |               |
|-----------------------------|---------------------------------------------------------------------------------------------|-----------------------------------------------------------------------------------------------------------------------------------------------------------------------------------------------------------------------------------------------------------------------------------------------------------------------------------------------------------------------------------------------------------------------------------------------------------------------------------------------------------------------------------------------------------------------------------------------------------------------------------------------------------------------------------------------------------------------------------------------------------------------------------------------------------------------------------------------------------------------------------------------------------------------------------------------------------------------------------------------------------------------------------------------------------------------------------------------------------------------------------------------------------------------------------------------------------------------------------------------------------------------------------------------------------------------------------------------------------------------------------------------------------------------------------------------------------------------------------------------------------------------------------------------------------------------------------------------------------------------------------------------------------------------------------------------------------------------------------------------------------------------------------------------------------------------------------------------|--------------|-------------|---------------------|-----------------|-----------------|--------|-----------------|-----------------|--------------------------|-------|--------|--|------|--------------|------|------|--------------------------|-------|--------|--|------|--------------|-------|-------|--------------------------|-------|--------|--|------|--------------|-------|-------|--------------------------|-------|--------|--|------|--------------|-------|-------|--------------------------|-------|--------|--|------|--------------|-------|-------|--------------------------|-------|--------|--|------|--------------|-------|-------|--------------------------|-------|--------|--|------|--------------|-------|-------|--------------------------|-------|--------|--|------|--------------|------|------|----------------------------|--|--|--|-------------|---------------------|---------------|-----------|-----------------------------|--|--|--|-------------|---------------------|-----------|---------------|
| Unadjusted                  | Age<br>(Continuous)                                                                         | <table border="1"> <thead> <tr> <th>Study</th> <th>TE</th> <th>seTE</th> <th>Hazard Ratio</th> <th>HR</th> <th>95%-CI</th> <th>Weight (common)</th> <th>Weight (random)</th> </tr> </thead> <tbody> <tr><td>2021-09-16_to_2021-09-29</td><td>-0.03</td><td>0.0082</td><td></td><td>0.97</td><td>[0.96; 0.99]</td><td>6.5%</td><td>8.0%</td></tr> <tr><td>2021-09-30_to_2021-10-13</td><td>-0.03</td><td>0.0049</td><td></td><td>0.97</td><td>[0.96; 0.98]</td><td>18.7%</td><td>17.2%</td></tr> <tr><td>2021-10-14_to_2021-10-27</td><td>-0.03</td><td>0.0053</td><td></td><td>0.97</td><td>[0.96; 0.98]</td><td>15.6%</td><td>15.3%</td></tr> <tr><td>2021-10-28_to_2021-11-10</td><td>-0.03</td><td>0.0049</td><td></td><td>0.97</td><td>[0.96; 0.98]</td><td>18.2%</td><td>16.9%</td></tr> <tr><td>2021-11-11_to_2021-11-24</td><td>-0.03</td><td>0.0055</td><td></td><td>0.97</td><td>[0.96; 0.98]</td><td>14.4%</td><td>14.5%</td></tr> <tr><td>2021-11-25_to_2021-12-08</td><td>-0.03</td><td>0.0065</td><td></td><td>0.97</td><td>[0.96; 0.98]</td><td>10.3%</td><td>11.5%</td></tr> <tr><td>2021-12-09_to_2021-12-22</td><td>-0.02</td><td>0.0054</td><td></td><td>0.98</td><td>[0.97; 0.99]</td><td>15.2%</td><td>15.0%</td></tr> <tr><td>2021-12-23_to_2022-01-05</td><td>-0.03</td><td>0.0196</td><td></td><td>0.97</td><td>[0.93; 1.01]</td><td>1.1%</td><td>1.6%</td></tr> <tr><td><b>Common effect model</b></td><td></td><td></td><td></td><td><b>0.97</b></td><td><b>[0.97; 0.97]</b></td><td><b>100.0%</b></td><td><b>--</b></td></tr> <tr><td><b>Random effects model</b></td><td></td><td></td><td></td><td><b>0.97</b></td><td><b>[0.96; 0.97]</b></td><td><b>--</b></td><td><b>100.0%</b></td></tr> </tbody> </table> <p>Heterogeneity: <math>I^2 = 19\%</math>, <math>\tau^2 = 0.0001</math>, <math>p = 0.28</math></p> | Study        | TE          | seTE                | Hazard Ratio    | HR              | 95%-CI | Weight (common) | Weight (random) | 2021-09-16_to_2021-09-29 | -0.03 | 0.0082 |  | 0.97 | [0.96; 0.99] | 6.5% | 8.0% | 2021-09-30_to_2021-10-13 | -0.03 | 0.0049 |  | 0.97 | [0.96; 0.98] | 18.7% | 17.2% | 2021-10-14_to_2021-10-27 | -0.03 | 0.0053 |  | 0.97 | [0.96; 0.98] | 15.6% | 15.3% | 2021-10-28_to_2021-11-10 | -0.03 | 0.0049 |  | 0.97 | [0.96; 0.98] | 18.2% | 16.9% | 2021-11-11_to_2021-11-24 | -0.03 | 0.0055 |  | 0.97 | [0.96; 0.98] | 14.4% | 14.5% | 2021-11-25_to_2021-12-08 | -0.03 | 0.0065 |  | 0.97 | [0.96; 0.98] | 10.3% | 11.5% | 2021-12-09_to_2021-12-22 | -0.02 | 0.0054 |  | 0.98 | [0.97; 0.99] | 15.2% | 15.0% | 2021-12-23_to_2022-01-05 | -0.03 | 0.0196 |  | 0.97 | [0.93; 1.01] | 1.1% | 1.6% | <b>Common effect model</b> |  |  |  | <b>0.97</b> | <b>[0.97; 0.97]</b> | <b>100.0%</b> | <b>--</b> | <b>Random effects model</b> |  |  |  | <b>0.97</b> | <b>[0.96; 0.97]</b> | <b>--</b> | <b>100.0%</b> |
| Study                       | TE                                                                                          | seTE                                                                                                                                                                                                                                                                                                                                                                                                                                                                                                                                                                                                                                                                                                                                                                                                                                                                                                                                                                                                                                                                                                                                                                                                                                                                                                                                                                                                                                                                                                                                                                                                                                                                                                                                                                                                                                          | Hazard Ratio | HR          | 95%-CI              | Weight (common) | Weight (random) |        |                 |                 |                          |       |        |  |      |              |      |      |                          |       |        |  |      |              |       |       |                          |       |        |  |      |              |       |       |                          |       |        |  |      |              |       |       |                          |       |        |  |      |              |       |       |                          |       |        |  |      |              |       |       |                          |       |        |  |      |              |       |       |                          |       |        |  |      |              |      |      |                            |  |  |  |             |                     |               |           |                             |  |  |  |             |                     |           |               |
| 2021-09-16_to_2021-09-29    | -0.03                                                                                       | 0.0082                                                                                                                                                                                                                                                                                                                                                                                                                                                                                                                                                                                                                                                                                                                                                                                                                                                                                                                                                                                                                                                                                                                                                                                                                                                                                                                                                                                                                                                                                                                                                                                                                                                                                                                                                                                                                                        |              | 0.97        | [0.96; 0.99]        | 6.5%            | 8.0%            |        |                 |                 |                          |       |        |  |      |              |      |      |                          |       |        |  |      |              |       |       |                          |       |        |  |      |              |       |       |                          |       |        |  |      |              |       |       |                          |       |        |  |      |              |       |       |                          |       |        |  |      |              |       |       |                          |       |        |  |      |              |       |       |                          |       |        |  |      |              |      |      |                            |  |  |  |             |                     |               |           |                             |  |  |  |             |                     |           |               |
| 2021-09-30_to_2021-10-13    | -0.03                                                                                       | 0.0049                                                                                                                                                                                                                                                                                                                                                                                                                                                                                                                                                                                                                                                                                                                                                                                                                                                                                                                                                                                                                                                                                                                                                                                                                                                                                                                                                                                                                                                                                                                                                                                                                                                                                                                                                                                                                                        |              | 0.97        | [0.96; 0.98]        | 18.7%           | 17.2%           |        |                 |                 |                          |       |        |  |      |              |      |      |                          |       |        |  |      |              |       |       |                          |       |        |  |      |              |       |       |                          |       |        |  |      |              |       |       |                          |       |        |  |      |              |       |       |                          |       |        |  |      |              |       |       |                          |       |        |  |      |              |       |       |                          |       |        |  |      |              |      |      |                            |  |  |  |             |                     |               |           |                             |  |  |  |             |                     |           |               |
| 2021-10-14_to_2021-10-27    | -0.03                                                                                       | 0.0053                                                                                                                                                                                                                                                                                                                                                                                                                                                                                                                                                                                                                                                                                                                                                                                                                                                                                                                                                                                                                                                                                                                                                                                                                                                                                                                                                                                                                                                                                                                                                                                                                                                                                                                                                                                                                                        |              | 0.97        | [0.96; 0.98]        | 15.6%           | 15.3%           |        |                 |                 |                          |       |        |  |      |              |      |      |                          |       |        |  |      |              |       |       |                          |       |        |  |      |              |       |       |                          |       |        |  |      |              |       |       |                          |       |        |  |      |              |       |       |                          |       |        |  |      |              |       |       |                          |       |        |  |      |              |       |       |                          |       |        |  |      |              |      |      |                            |  |  |  |             |                     |               |           |                             |  |  |  |             |                     |           |               |
| 2021-10-28_to_2021-11-10    | -0.03                                                                                       | 0.0049                                                                                                                                                                                                                                                                                                                                                                                                                                                                                                                                                                                                                                                                                                                                                                                                                                                                                                                                                                                                                                                                                                                                                                                                                                                                                                                                                                                                                                                                                                                                                                                                                                                                                                                                                                                                                                        |              | 0.97        | [0.96; 0.98]        | 18.2%           | 16.9%           |        |                 |                 |                          |       |        |  |      |              |      |      |                          |       |        |  |      |              |       |       |                          |       |        |  |      |              |       |       |                          |       |        |  |      |              |       |       |                          |       |        |  |      |              |       |       |                          |       |        |  |      |              |       |       |                          |       |        |  |      |              |       |       |                          |       |        |  |      |              |      |      |                            |  |  |  |             |                     |               |           |                             |  |  |  |             |                     |           |               |
| 2021-11-11_to_2021-11-24    | -0.03                                                                                       | 0.0055                                                                                                                                                                                                                                                                                                                                                                                                                                                                                                                                                                                                                                                                                                                                                                                                                                                                                                                                                                                                                                                                                                                                                                                                                                                                                                                                                                                                                                                                                                                                                                                                                                                                                                                                                                                                                                        |              | 0.97        | [0.96; 0.98]        | 14.4%           | 14.5%           |        |                 |                 |                          |       |        |  |      |              |      |      |                          |       |        |  |      |              |       |       |                          |       |        |  |      |              |       |       |                          |       |        |  |      |              |       |       |                          |       |        |  |      |              |       |       |                          |       |        |  |      |              |       |       |                          |       |        |  |      |              |       |       |                          |       |        |  |      |              |      |      |                            |  |  |  |             |                     |               |           |                             |  |  |  |             |                     |           |               |
| 2021-11-25_to_2021-12-08    | -0.03                                                                                       | 0.0065                                                                                                                                                                                                                                                                                                                                                                                                                                                                                                                                                                                                                                                                                                                                                                                                                                                                                                                                                                                                                                                                                                                                                                                                                                                                                                                                                                                                                                                                                                                                                                                                                                                                                                                                                                                                                                        |              | 0.97        | [0.96; 0.98]        | 10.3%           | 11.5%           |        |                 |                 |                          |       |        |  |      |              |      |      |                          |       |        |  |      |              |       |       |                          |       |        |  |      |              |       |       |                          |       |        |  |      |              |       |       |                          |       |        |  |      |              |       |       |                          |       |        |  |      |              |       |       |                          |       |        |  |      |              |       |       |                          |       |        |  |      |              |      |      |                            |  |  |  |             |                     |               |           |                             |  |  |  |             |                     |           |               |
| 2021-12-09_to_2021-12-22    | -0.02                                                                                       | 0.0054                                                                                                                                                                                                                                                                                                                                                                                                                                                                                                                                                                                                                                                                                                                                                                                                                                                                                                                                                                                                                                                                                                                                                                                                                                                                                                                                                                                                                                                                                                                                                                                                                                                                                                                                                                                                                                        |              | 0.98        | [0.97; 0.99]        | 15.2%           | 15.0%           |        |                 |                 |                          |       |        |  |      |              |      |      |                          |       |        |  |      |              |       |       |                          |       |        |  |      |              |       |       |                          |       |        |  |      |              |       |       |                          |       |        |  |      |              |       |       |                          |       |        |  |      |              |       |       |                          |       |        |  |      |              |       |       |                          |       |        |  |      |              |      |      |                            |  |  |  |             |                     |               |           |                             |  |  |  |             |                     |           |               |
| 2021-12-23_to_2022-01-05    | -0.03                                                                                       | 0.0196                                                                                                                                                                                                                                                                                                                                                                                                                                                                                                                                                                                                                                                                                                                                                                                                                                                                                                                                                                                                                                                                                                                                                                                                                                                                                                                                                                                                                                                                                                                                                                                                                                                                                                                                                                                                                                        |              | 0.97        | [0.93; 1.01]        | 1.1%            | 1.6%            |        |                 |                 |                          |       |        |  |      |              |      |      |                          |       |        |  |      |              |       |       |                          |       |        |  |      |              |       |       |                          |       |        |  |      |              |       |       |                          |       |        |  |      |              |       |       |                          |       |        |  |      |              |       |       |                          |       |        |  |      |              |       |       |                          |       |        |  |      |              |      |      |                            |  |  |  |             |                     |               |           |                             |  |  |  |             |                     |           |               |
| <b>Common effect model</b>  |                                                                                             |                                                                                                                                                                                                                                                                                                                                                                                                                                                                                                                                                                                                                                                                                                                                                                                                                                                                                                                                                                                                                                                                                                                                                                                                                                                                                                                                                                                                                                                                                                                                                                                                                                                                                                                                                                                                                                               |              | <b>0.97</b> | <b>[0.97; 0.97]</b> | <b>100.0%</b>   | <b>--</b>       |        |                 |                 |                          |       |        |  |      |              |      |      |                          |       |        |  |      |              |       |       |                          |       |        |  |      |              |       |       |                          |       |        |  |      |              |       |       |                          |       |        |  |      |              |       |       |                          |       |        |  |      |              |       |       |                          |       |        |  |      |              |       |       |                          |       |        |  |      |              |      |      |                            |  |  |  |             |                     |               |           |                             |  |  |  |             |                     |           |               |
| <b>Random effects model</b> |                                                                                             |                                                                                                                                                                                                                                                                                                                                                                                                                                                                                                                                                                                                                                                                                                                                                                                                                                                                                                                                                                                                                                                                                                                                                                                                                                                                                                                                                                                                                                                                                                                                                                                                                                                                                                                                                                                                                                               |              | <b>0.97</b> | <b>[0.96; 0.97]</b> | <b>--</b>       | <b>100.0%</b>   |        |                 |                 |                          |       |        |  |      |              |      |      |                          |       |        |  |      |              |       |       |                          |       |        |  |      |              |       |       |                          |       |        |  |      |              |       |       |                          |       |        |  |      |              |       |       |                          |       |        |  |      |              |       |       |                          |       |        |  |      |              |       |       |                          |       |        |  |      |              |      |      |                            |  |  |  |             |                     |               |           |                             |  |  |  |             |                     |           |               |
|                             | Clinical vulnerability<br>(Clinically extremely vulnerable in reference to None Identified) | <table border="1"> <thead> <tr> <th>Study</th> <th>TE</th> <th>seTE</th> <th>Hazard Ratio</th> <th>HR</th> <th>95%-CI</th> <th>Weight (common)</th> <th>Weight (random)</th> </tr> </thead> <tbody> <tr><td>2021-09-16_to_2021-09-29</td><td>-0.51</td><td>0.3388</td><td></td><td>0.60</td><td>[0.31; 1.17]</td><td>5.6%</td><td>6.4%</td></tr> <tr><td>2021-09-30_to_2021-10-13</td><td>0.32</td><td>0.1861</td><td></td><td>1.38</td><td>[0.96; 1.99]</td><td>18.6%</td><td>18.4%</td></tr> <tr><td>2021-10-14_to_2021-10-27</td><td>0.05</td><td>0.1723</td><td></td><td>1.05</td><td>[0.75; 1.47]</td><td>21.7%</td><td>20.8%</td></tr> <tr><td>2021-10-28_to_2021-11-10</td><td>0.02</td><td>0.1584</td><td></td><td>1.02</td><td>[0.75; 1.39]</td><td>25.7%</td><td>23.7%</td></tr> <tr><td>2021-11-11_to_2021-11-24</td><td>-0.19</td><td>0.2090</td><td></td><td>0.82</td><td>[0.55; 1.24]</td><td>14.7%</td><td>15.2%</td></tr> <tr><td>2021-11-25_to_2021-12-08</td><td>-0.25</td><td>0.3011</td><td></td><td>0.78</td><td>[0.43; 1.41]</td><td>7.1%</td><td>8.0%</td></tr> <tr><td>2021-12-09_to_2021-12-22</td><td>-0.24</td><td>0.3256</td><td></td><td>0.79</td><td>[0.41; 1.49]</td><td>6.1%</td><td>6.9%</td></tr> <tr><td>2021-12-23_to_2022-01-05</td><td>0.05</td><td>1.0353</td><td></td><td>1.05</td><td>[0.14; 7.97]</td><td>0.6%</td><td>0.7%</td></tr> <tr><td><b>Common effect model</b></td><td></td><td></td><td></td><td><b>0.99</b></td><td><b>[0.84; 1.15]</b></td><td><b>100.0%</b></td><td><b>--</b></td></tr> <tr><td><b>Random effects model</b></td><td></td><td></td><td></td><td><b>0.98</b></td><td><b>[0.82; 1.16]</b></td><td><b>--</b></td><td><b>100.0%</b></td></tr> </tbody> </table> <p>Heterogeneity: <math>I^2 = 5\%</math>, <math>\tau^2 = 0.0062</math>, <math>p = 0.39</math></p>          | Study        | TE          | seTE                | Hazard Ratio    | HR              | 95%-CI | Weight (common) | Weight (random) | 2021-09-16_to_2021-09-29 | -0.51 | 0.3388 |  | 0.60 | [0.31; 1.17] | 5.6% | 6.4% | 2021-09-30_to_2021-10-13 | 0.32  | 0.1861 |  | 1.38 | [0.96; 1.99] | 18.6% | 18.4% | 2021-10-14_to_2021-10-27 | 0.05  | 0.1723 |  | 1.05 | [0.75; 1.47] | 21.7% | 20.8% | 2021-10-28_to_2021-11-10 | 0.02  | 0.1584 |  | 1.02 | [0.75; 1.39] | 25.7% | 23.7% | 2021-11-11_to_2021-11-24 | -0.19 | 0.2090 |  | 0.82 | [0.55; 1.24] | 14.7% | 15.2% | 2021-11-25_to_2021-12-08 | -0.25 | 0.3011 |  | 0.78 | [0.43; 1.41] | 7.1%  | 8.0%  | 2021-12-09_to_2021-12-22 | -0.24 | 0.3256 |  | 0.79 | [0.41; 1.49] | 6.1%  | 6.9%  | 2021-12-23_to_2022-01-05 | 0.05  | 1.0353 |  | 1.05 | [0.14; 7.97] | 0.6% | 0.7% | <b>Common effect model</b> |  |  |  | <b>0.99</b> | <b>[0.84; 1.15]</b> | <b>100.0%</b> | <b>--</b> | <b>Random effects model</b> |  |  |  | <b>0.98</b> | <b>[0.82; 1.16]</b> | <b>--</b> | <b>100.0%</b> |
| Study                       | TE                                                                                          | seTE                                                                                                                                                                                                                                                                                                                                                                                                                                                                                                                                                                                                                                                                                                                                                                                                                                                                                                                                                                                                                                                                                                                                                                                                                                                                                                                                                                                                                                                                                                                                                                                                                                                                                                                                                                                                                                          | Hazard Ratio | HR          | 95%-CI              | Weight (common) | Weight (random) |        |                 |                 |                          |       |        |  |      |              |      |      |                          |       |        |  |      |              |       |       |                          |       |        |  |      |              |       |       |                          |       |        |  |      |              |       |       |                          |       |        |  |      |              |       |       |                          |       |        |  |      |              |       |       |                          |       |        |  |      |              |       |       |                          |       |        |  |      |              |      |      |                            |  |  |  |             |                     |               |           |                             |  |  |  |             |                     |           |               |
| 2021-09-16_to_2021-09-29    | -0.51                                                                                       | 0.3388                                                                                                                                                                                                                                                                                                                                                                                                                                                                                                                                                                                                                                                                                                                                                                                                                                                                                                                                                                                                                                                                                                                                                                                                                                                                                                                                                                                                                                                                                                                                                                                                                                                                                                                                                                                                                                        |              | 0.60        | [0.31; 1.17]        | 5.6%            | 6.4%            |        |                 |                 |                          |       |        |  |      |              |      |      |                          |       |        |  |      |              |       |       |                          |       |        |  |      |              |       |       |                          |       |        |  |      |              |       |       |                          |       |        |  |      |              |       |       |                          |       |        |  |      |              |       |       |                          |       |        |  |      |              |       |       |                          |       |        |  |      |              |      |      |                            |  |  |  |             |                     |               |           |                             |  |  |  |             |                     |           |               |
| 2021-09-30_to_2021-10-13    | 0.32                                                                                        | 0.1861                                                                                                                                                                                                                                                                                                                                                                                                                                                                                                                                                                                                                                                                                                                                                                                                                                                                                                                                                                                                                                                                                                                                                                                                                                                                                                                                                                                                                                                                                                                                                                                                                                                                                                                                                                                                                                        |              | 1.38        | [0.96; 1.99]        | 18.6%           | 18.4%           |        |                 |                 |                          |       |        |  |      |              |      |      |                          |       |        |  |      |              |       |       |                          |       |        |  |      |              |       |       |                          |       |        |  |      |              |       |       |                          |       |        |  |      |              |       |       |                          |       |        |  |      |              |       |       |                          |       |        |  |      |              |       |       |                          |       |        |  |      |              |      |      |                            |  |  |  |             |                     |               |           |                             |  |  |  |             |                     |           |               |
| 2021-10-14_to_2021-10-27    | 0.05                                                                                        | 0.1723                                                                                                                                                                                                                                                                                                                                                                                                                                                                                                                                                                                                                                                                                                                                                                                                                                                                                                                                                                                                                                                                                                                                                                                                                                                                                                                                                                                                                                                                                                                                                                                                                                                                                                                                                                                                                                        |              | 1.05        | [0.75; 1.47]        | 21.7%           | 20.8%           |        |                 |                 |                          |       |        |  |      |              |      |      |                          |       |        |  |      |              |       |       |                          |       |        |  |      |              |       |       |                          |       |        |  |      |              |       |       |                          |       |        |  |      |              |       |       |                          |       |        |  |      |              |       |       |                          |       |        |  |      |              |       |       |                          |       |        |  |      |              |      |      |                            |  |  |  |             |                     |               |           |                             |  |  |  |             |                     |           |               |
| 2021-10-28_to_2021-11-10    | 0.02                                                                                        | 0.1584                                                                                                                                                                                                                                                                                                                                                                                                                                                                                                                                                                                                                                                                                                                                                                                                                                                                                                                                                                                                                                                                                                                                                                                                                                                                                                                                                                                                                                                                                                                                                                                                                                                                                                                                                                                                                                        |              | 1.02        | [0.75; 1.39]        | 25.7%           | 23.7%           |        |                 |                 |                          |       |        |  |      |              |      |      |                          |       |        |  |      |              |       |       |                          |       |        |  |      |              |       |       |                          |       |        |  |      |              |       |       |                          |       |        |  |      |              |       |       |                          |       |        |  |      |              |       |       |                          |       |        |  |      |              |       |       |                          |       |        |  |      |              |      |      |                            |  |  |  |             |                     |               |           |                             |  |  |  |             |                     |           |               |
| 2021-11-11_to_2021-11-24    | -0.19                                                                                       | 0.2090                                                                                                                                                                                                                                                                                                                                                                                                                                                                                                                                                                                                                                                                                                                                                                                                                                                                                                                                                                                                                                                                                                                                                                                                                                                                                                                                                                                                                                                                                                                                                                                                                                                                                                                                                                                                                                        |              | 0.82        | [0.55; 1.24]        | 14.7%           | 15.2%           |        |                 |                 |                          |       |        |  |      |              |      |      |                          |       |        |  |      |              |       |       |                          |       |        |  |      |              |       |       |                          |       |        |  |      |              |       |       |                          |       |        |  |      |              |       |       |                          |       |        |  |      |              |       |       |                          |       |        |  |      |              |       |       |                          |       |        |  |      |              |      |      |                            |  |  |  |             |                     |               |           |                             |  |  |  |             |                     |           |               |
| 2021-11-25_to_2021-12-08    | -0.25                                                                                       | 0.3011                                                                                                                                                                                                                                                                                                                                                                                                                                                                                                                                                                                                                                                                                                                                                                                                                                                                                                                                                                                                                                                                                                                                                                                                                                                                                                                                                                                                                                                                                                                                                                                                                                                                                                                                                                                                                                        |              | 0.78        | [0.43; 1.41]        | 7.1%            | 8.0%            |        |                 |                 |                          |       |        |  |      |              |      |      |                          |       |        |  |      |              |       |       |                          |       |        |  |      |              |       |       |                          |       |        |  |      |              |       |       |                          |       |        |  |      |              |       |       |                          |       |        |  |      |              |       |       |                          |       |        |  |      |              |       |       |                          |       |        |  |      |              |      |      |                            |  |  |  |             |                     |               |           |                             |  |  |  |             |                     |           |               |
| 2021-12-09_to_2021-12-22    | -0.24                                                                                       | 0.3256                                                                                                                                                                                                                                                                                                                                                                                                                                                                                                                                                                                                                                                                                                                                                                                                                                                                                                                                                                                                                                                                                                                                                                                                                                                                                                                                                                                                                                                                                                                                                                                                                                                                                                                                                                                                                                        |              | 0.79        | [0.41; 1.49]        | 6.1%            | 6.9%            |        |                 |                 |                          |       |        |  |      |              |      |      |                          |       |        |  |      |              |       |       |                          |       |        |  |      |              |       |       |                          |       |        |  |      |              |       |       |                          |       |        |  |      |              |       |       |                          |       |        |  |      |              |       |       |                          |       |        |  |      |              |       |       |                          |       |        |  |      |              |      |      |                            |  |  |  |             |                     |               |           |                             |  |  |  |             |                     |           |               |
| 2021-12-23_to_2022-01-05    | 0.05                                                                                        | 1.0353                                                                                                                                                                                                                                                                                                                                                                                                                                                                                                                                                                                                                                                                                                                                                                                                                                                                                                                                                                                                                                                                                                                                                                                                                                                                                                                                                                                                                                                                                                                                                                                                                                                                                                                                                                                                                                        |              | 1.05        | [0.14; 7.97]        | 0.6%            | 0.7%            |        |                 |                 |                          |       |        |  |      |              |      |      |                          |       |        |  |      |              |       |       |                          |       |        |  |      |              |       |       |                          |       |        |  |      |              |       |       |                          |       |        |  |      |              |       |       |                          |       |        |  |      |              |       |       |                          |       |        |  |      |              |       |       |                          |       |        |  |      |              |      |      |                            |  |  |  |             |                     |               |           |                             |  |  |  |             |                     |           |               |
| <b>Common effect model</b>  |                                                                                             |                                                                                                                                                                                                                                                                                                                                                                                                                                                                                                                                                                                                                                                                                                                                                                                                                                                                                                                                                                                                                                                                                                                                                                                                                                                                                                                                                                                                                                                                                                                                                                                                                                                                                                                                                                                                                                               |              | <b>0.99</b> | <b>[0.84; 1.15]</b> | <b>100.0%</b>   | <b>--</b>       |        |                 |                 |                          |       |        |  |      |              |      |      |                          |       |        |  |      |              |       |       |                          |       |        |  |      |              |       |       |                          |       |        |  |      |              |       |       |                          |       |        |  |      |              |       |       |                          |       |        |  |      |              |       |       |                          |       |        |  |      |              |       |       |                          |       |        |  |      |              |      |      |                            |  |  |  |             |                     |               |           |                             |  |  |  |             |                     |           |               |
| <b>Random effects model</b> |                                                                                             |                                                                                                                                                                                                                                                                                                                                                                                                                                                                                                                                                                                                                                                                                                                                                                                                                                                                                                                                                                                                                                                                                                                                                                                                                                                                                                                                                                                                                                                                                                                                                                                                                                                                                                                                                                                                                                               |              | <b>0.98</b> | <b>[0.82; 1.16]</b> | <b>--</b>       | <b>100.0%</b>   |        |                 |                 |                          |       |        |  |      |              |      |      |                          |       |        |  |      |              |       |       |                          |       |        |  |      |              |       |       |                          |       |        |  |      |              |       |       |                          |       |        |  |      |              |       |       |                          |       |        |  |      |              |       |       |                          |       |        |  |      |              |       |       |                          |       |        |  |      |              |      |      |                            |  |  |  |             |                     |               |           |                             |  |  |  |             |                     |           |               |
|                             | Clinical vulnerability<br>(Clinically vulnerable in reference to None identified)           | <table border="1"> <thead> <tr> <th>Study</th> <th>TE</th> <th>seTE</th> <th>Hazard Ratio</th> <th>HR</th> <th>95%-CI</th> <th>Weight (common)</th> <th>Weight (random)</th> </tr> </thead> <tbody> <tr><td>2021-09-16_to_2021-09-29</td><td>-0.23</td><td>0.2765</td><td></td><td>0.80</td><td>[0.46; 1.37]</td><td>4.5%</td><td>6.1%</td></tr> <tr><td>2021-09-30_to_2021-10-13</td><td>0.29</td><td>0.1606</td><td></td><td>1.34</td><td>[0.98; 1.83]</td><td>13.4%</td><td>14.1%</td></tr> <tr><td>2021-10-14_to_2021-10-27</td><td>-0.16</td><td>0.1471</td><td></td><td>0.85</td><td>[0.64; 1.14]</td><td>16.0%</td><td>15.7%</td></tr> <tr><td>2021-10-28_to_2021-11-10</td><td>-0.18</td><td>0.1283</td><td></td><td>0.83</td><td>[0.65; 1.07]</td><td>21.0%</td><td>18.5%</td></tr> <tr><td>2021-11-11_to_2021-11-24</td><td>-0.20</td><td>0.1337</td><td></td><td>0.82</td><td>[0.63; 1.06]</td><td>19.3%</td><td>17.6%</td></tr> <tr><td>2021-11-25_to_2021-12-08</td><td>0.05</td><td>0.1567</td><td></td><td>1.05</td><td>[0.77; 1.43]</td><td>14.1%</td><td>14.5%</td></tr> <tr><td>2021-12-09_to_2021-12-22</td><td>-0.27</td><td>0.1760</td><td></td><td>0.76</td><td>[0.54; 1.07]</td><td>11.1%</td><td>12.4%</td></tr> <tr><td>2021-12-23_to_2022-01-05</td><td>-0.81</td><td>0.7560</td><td></td><td>0.44</td><td>[0.10; 1.95]</td><td>0.6%</td><td>0.9%</td></tr> <tr><td><b>Common effect model</b></td><td></td><td></td><td></td><td><b>0.90</b></td><td><b>[0.80; 1.01]</b></td><td><b>100.0%</b></td><td><b>--</b></td></tr> <tr><td><b>Random effects model</b></td><td></td><td></td><td></td><td><b>0.90</b></td><td><b>[0.78; 1.05]</b></td><td><b>--</b></td><td><b>100.0%</b></td></tr> </tbody> </table> <p>Heterogeneity: <math>I^2 = 30\%</math>, <math>\tau^2 = 0.0134</math>, <math>p = 0.19</math></p>   | Study        | TE          | seTE                | Hazard Ratio    | HR              | 95%-CI | Weight (common) | Weight (random) | 2021-09-16_to_2021-09-29 | -0.23 | 0.2765 |  | 0.80 | [0.46; 1.37] | 4.5% | 6.1% | 2021-09-30_to_2021-10-13 | 0.29  | 0.1606 |  | 1.34 | [0.98; 1.83] | 13.4% | 14.1% | 2021-10-14_to_2021-10-27 | -0.16 | 0.1471 |  | 0.85 | [0.64; 1.14] | 16.0% | 15.7% | 2021-10-28_to_2021-11-10 | -0.18 | 0.1283 |  | 0.83 | [0.65; 1.07] | 21.0% | 18.5% | 2021-11-11_to_2021-11-24 | -0.20 | 0.1337 |  | 0.82 | [0.63; 1.06] | 19.3% | 17.6% | 2021-11-25_to_2021-12-08 | 0.05  | 0.1567 |  | 1.05 | [0.77; 1.43] | 14.1% | 14.5% | 2021-12-09_to_2021-12-22 | -0.27 | 0.1760 |  | 0.76 | [0.54; 1.07] | 11.1% | 12.4% | 2021-12-23_to_2022-01-05 | -0.81 | 0.7560 |  | 0.44 | [0.10; 1.95] | 0.6% | 0.9% | <b>Common effect model</b> |  |  |  | <b>0.90</b> | <b>[0.80; 1.01]</b> | <b>100.0%</b> | <b>--</b> | <b>Random effects model</b> |  |  |  | <b>0.90</b> | <b>[0.78; 1.05]</b> | <b>--</b> | <b>100.0%</b> |
| Study                       | TE                                                                                          | seTE                                                                                                                                                                                                                                                                                                                                                                                                                                                                                                                                                                                                                                                                                                                                                                                                                                                                                                                                                                                                                                                                                                                                                                                                                                                                                                                                                                                                                                                                                                                                                                                                                                                                                                                                                                                                                                          | Hazard Ratio | HR          | 95%-CI              | Weight (common) | Weight (random) |        |                 |                 |                          |       |        |  |      |              |      |      |                          |       |        |  |      |              |       |       |                          |       |        |  |      |              |       |       |                          |       |        |  |      |              |       |       |                          |       |        |  |      |              |       |       |                          |       |        |  |      |              |       |       |                          |       |        |  |      |              |       |       |                          |       |        |  |      |              |      |      |                            |  |  |  |             |                     |               |           |                             |  |  |  |             |                     |           |               |
| 2021-09-16_to_2021-09-29    | -0.23                                                                                       | 0.2765                                                                                                                                                                                                                                                                                                                                                                                                                                                                                                                                                                                                                                                                                                                                                                                                                                                                                                                                                                                                                                                                                                                                                                                                                                                                                                                                                                                                                                                                                                                                                                                                                                                                                                                                                                                                                                        |              | 0.80        | [0.46; 1.37]        | 4.5%            | 6.1%            |        |                 |                 |                          |       |        |  |      |              |      |      |                          |       |        |  |      |              |       |       |                          |       |        |  |      |              |       |       |                          |       |        |  |      |              |       |       |                          |       |        |  |      |              |       |       |                          |       |        |  |      |              |       |       |                          |       |        |  |      |              |       |       |                          |       |        |  |      |              |      |      |                            |  |  |  |             |                     |               |           |                             |  |  |  |             |                     |           |               |
| 2021-09-30_to_2021-10-13    | 0.29                                                                                        | 0.1606                                                                                                                                                                                                                                                                                                                                                                                                                                                                                                                                                                                                                                                                                                                                                                                                                                                                                                                                                                                                                                                                                                                                                                                                                                                                                                                                                                                                                                                                                                                                                                                                                                                                                                                                                                                                                                        |              | 1.34        | [0.98; 1.83]        | 13.4%           | 14.1%           |        |                 |                 |                          |       |        |  |      |              |      |      |                          |       |        |  |      |              |       |       |                          |       |        |  |      |              |       |       |                          |       |        |  |      |              |       |       |                          |       |        |  |      |              |       |       |                          |       |        |  |      |              |       |       |                          |       |        |  |      |              |       |       |                          |       |        |  |      |              |      |      |                            |  |  |  |             |                     |               |           |                             |  |  |  |             |                     |           |               |
| 2021-10-14_to_2021-10-27    | -0.16                                                                                       | 0.1471                                                                                                                                                                                                                                                                                                                                                                                                                                                                                                                                                                                                                                                                                                                                                                                                                                                                                                                                                                                                                                                                                                                                                                                                                                                                                                                                                                                                                                                                                                                                                                                                                                                                                                                                                                                                                                        |              | 0.85        | [0.64; 1.14]        | 16.0%           | 15.7%           |        |                 |                 |                          |       |        |  |      |              |      |      |                          |       |        |  |      |              |       |       |                          |       |        |  |      |              |       |       |                          |       |        |  |      |              |       |       |                          |       |        |  |      |              |       |       |                          |       |        |  |      |              |       |       |                          |       |        |  |      |              |       |       |                          |       |        |  |      |              |      |      |                            |  |  |  |             |                     |               |           |                             |  |  |  |             |                     |           |               |
| 2021-10-28_to_2021-11-10    | -0.18                                                                                       | 0.1283                                                                                                                                                                                                                                                                                                                                                                                                                                                                                                                                                                                                                                                                                                                                                                                                                                                                                                                                                                                                                                                                                                                                                                                                                                                                                                                                                                                                                                                                                                                                                                                                                                                                                                                                                                                                                                        |              | 0.83        | [0.65; 1.07]        | 21.0%           | 18.5%           |        |                 |                 |                          |       |        |  |      |              |      |      |                          |       |        |  |      |              |       |       |                          |       |        |  |      |              |       |       |                          |       |        |  |      |              |       |       |                          |       |        |  |      |              |       |       |                          |       |        |  |      |              |       |       |                          |       |        |  |      |              |       |       |                          |       |        |  |      |              |      |      |                            |  |  |  |             |                     |               |           |                             |  |  |  |             |                     |           |               |
| 2021-11-11_to_2021-11-24    | -0.20                                                                                       | 0.1337                                                                                                                                                                                                                                                                                                                                                                                                                                                                                                                                                                                                                                                                                                                                                                                                                                                                                                                                                                                                                                                                                                                                                                                                                                                                                                                                                                                                                                                                                                                                                                                                                                                                                                                                                                                                                                        |              | 0.82        | [0.63; 1.06]        | 19.3%           | 17.6%           |        |                 |                 |                          |       |        |  |      |              |      |      |                          |       |        |  |      |              |       |       |                          |       |        |  |      |              |       |       |                          |       |        |  |      |              |       |       |                          |       |        |  |      |              |       |       |                          |       |        |  |      |              |       |       |                          |       |        |  |      |              |       |       |                          |       |        |  |      |              |      |      |                            |  |  |  |             |                     |               |           |                             |  |  |  |             |                     |           |               |
| 2021-11-25_to_2021-12-08    | 0.05                                                                                        | 0.1567                                                                                                                                                                                                                                                                                                                                                                                                                                                                                                                                                                                                                                                                                                                                                                                                                                                                                                                                                                                                                                                                                                                                                                                                                                                                                                                                                                                                                                                                                                                                                                                                                                                                                                                                                                                                                                        |              | 1.05        | [0.77; 1.43]        | 14.1%           | 14.5%           |        |                 |                 |                          |       |        |  |      |              |      |      |                          |       |        |  |      |              |       |       |                          |       |        |  |      |              |       |       |                          |       |        |  |      |              |       |       |                          |       |        |  |      |              |       |       |                          |       |        |  |      |              |       |       |                          |       |        |  |      |              |       |       |                          |       |        |  |      |              |      |      |                            |  |  |  |             |                     |               |           |                             |  |  |  |             |                     |           |               |
| 2021-12-09_to_2021-12-22    | -0.27                                                                                       | 0.1760                                                                                                                                                                                                                                                                                                                                                                                                                                                                                                                                                                                                                                                                                                                                                                                                                                                                                                                                                                                                                                                                                                                                                                                                                                                                                                                                                                                                                                                                                                                                                                                                                                                                                                                                                                                                                                        |              | 0.76        | [0.54; 1.07]        | 11.1%           | 12.4%           |        |                 |                 |                          |       |        |  |      |              |      |      |                          |       |        |  |      |              |       |       |                          |       |        |  |      |              |       |       |                          |       |        |  |      |              |       |       |                          |       |        |  |      |              |       |       |                          |       |        |  |      |              |       |       |                          |       |        |  |      |              |       |       |                          |       |        |  |      |              |      |      |                            |  |  |  |             |                     |               |           |                             |  |  |  |             |                     |           |               |
| 2021-12-23_to_2022-01-05    | -0.81                                                                                       | 0.7560                                                                                                                                                                                                                                                                                                                                                                                                                                                                                                                                                                                                                                                                                                                                                                                                                                                                                                                                                                                                                                                                                                                                                                                                                                                                                                                                                                                                                                                                                                                                                                                                                                                                                                                                                                                                                                        |              | 0.44        | [0.10; 1.95]        | 0.6%            | 0.9%            |        |                 |                 |                          |       |        |  |      |              |      |      |                          |       |        |  |      |              |       |       |                          |       |        |  |      |              |       |       |                          |       |        |  |      |              |       |       |                          |       |        |  |      |              |       |       |                          |       |        |  |      |              |       |       |                          |       |        |  |      |              |       |       |                          |       |        |  |      |              |      |      |                            |  |  |  |             |                     |               |           |                             |  |  |  |             |                     |           |               |
| <b>Common effect model</b>  |                                                                                             |                                                                                                                                                                                                                                                                                                                                                                                                                                                                                                                                                                                                                                                                                                                                                                                                                                                                                                                                                                                                                                                                                                                                                                                                                                                                                                                                                                                                                                                                                                                                                                                                                                                                                                                                                                                                                                               |              | <b>0.90</b> | <b>[0.80; 1.01]</b> | <b>100.0%</b>   | <b>--</b>       |        |                 |                 |                          |       |        |  |      |              |      |      |                          |       |        |  |      |              |       |       |                          |       |        |  |      |              |       |       |                          |       |        |  |      |              |       |       |                          |       |        |  |      |              |       |       |                          |       |        |  |      |              |       |       |                          |       |        |  |      |              |       |       |                          |       |        |  |      |              |      |      |                            |  |  |  |             |                     |               |           |                             |  |  |  |             |                     |           |               |
| <b>Random effects model</b> |                                                                                             |                                                                                                                                                                                                                                                                                                                                                                                                                                                                                                                                                                                                                                                                                                                                                                                                                                                                                                                                                                                                                                                                                                                                                                                                                                                                                                                                                                                                                                                                                                                                                                                                                                                                                                                                                                                                                                               |              | <b>0.90</b> | <b>[0.78; 1.05]</b> | <b>--</b>       | <b>100.0%</b>   |        |                 |                 |                          |       |        |  |      |              |      |      |                          |       |        |  |      |              |       |       |                          |       |        |  |      |              |       |       |                          |       |        |  |      |              |       |       |                          |       |        |  |      |              |       |       |                          |       |        |  |      |              |       |       |                          |       |        |  |      |              |       |       |                          |       |        |  |      |              |      |      |                            |  |  |  |             |                     |               |           |                             |  |  |  |             |                     |           |               |
|                             | Vaccine type - Oxford AstraZeneca ChAdOx1 in reference to Pfizer BioNTech BNT162b2          | <table border="1"> <thead> <tr> <th>Study</th> <th>TE</th> <th>seTE</th> <th>Hazard Ratio</th> <th>HR</th> <th>95%-CI</th> <th>Weight (common)</th> <th>Weight (random)</th> </tr> </thead> <tbody> <tr><td>2021-09-16_to_2021-09-29</td><td>-0.30</td><td>0.3408</td><td></td><td>0.74</td><td>[0.38; 1.44]</td><td>2.7%</td><td>2.7%</td></tr> <tr><td>2021-09-30_to_2021-10-13</td><td>0.01</td><td>0.1488</td><td></td><td>1.01</td><td>[0.76; 1.36]</td><td>14.0%</td><td>14.0%</td></tr> <tr><td>2021-10-14_to_2021-10-27</td><td>-0.20</td><td>0.1282</td><td></td><td>0.82</td><td>[0.63; 1.05]</td><td>18.9%</td><td>18.9%</td></tr> <tr><td>2021-10-28_to_2021-11-10</td><td>-0.10</td><td>0.1132</td><td></td><td>0.91</td><td>[0.73; 1.13]</td><td>24.2%</td><td>24.2%</td></tr> <tr><td>2021-11-11_to_2021-11-24</td><td>0.12</td><td>0.1355</td><td></td><td>1.13</td><td>[0.87; 1.47]</td><td>16.9%</td><td>16.9%</td></tr> <tr><td>2021-11-25_to_2021-12-08</td><td>0.16</td><td>0.2098</td><td></td><td>1.18</td><td>[0.78; 1.77]</td><td>7.1%</td><td>7.1%</td></tr> <tr><td>2021-12-09_to_2021-12-22</td><td>-0.07</td><td>0.1450</td><td></td><td>0.94</td><td>[0.70; 1.24]</td><td>14.8%</td><td>14.8%</td></tr> <tr><td>2021-12-23_to_2022-01-05</td><td>-0.48</td><td>0.4862</td><td></td><td>0.62</td><td>[0.24; 1.61]</td><td>1.3%</td><td>1.3%</td></tr> <tr><td><b>Common effect model</b></td><td></td><td></td><td></td><td><b>0.95</b></td><td><b>[0.85; 1.06]</b></td><td><b>100.0%</b></td><td><b>--</b></td></tr> <tr><td><b>Random effects model</b></td><td></td><td></td><td></td><td><b>0.95</b></td><td><b>[0.85; 1.06]</b></td><td><b>--</b></td><td><b>100.0%</b></td></tr> </tbody> </table> <p>Heterogeneity: <math>I^2 = 0\%</math>, <math>\tau^2 = 0</math>, <math>p = 0.57</math></p>            | Study        | TE          | seTE                | Hazard Ratio    | HR              | 95%-CI | Weight (common) | Weight (random) | 2021-09-16_to_2021-09-29 | -0.30 | 0.3408 |  | 0.74 | [0.38; 1.44] | 2.7% | 2.7% | 2021-09-30_to_2021-10-13 | 0.01  | 0.1488 |  | 1.01 | [0.76; 1.36] | 14.0% | 14.0% | 2021-10-14_to_2021-10-27 | -0.20 | 0.1282 |  | 0.82 | [0.63; 1.05] | 18.9% | 18.9% | 2021-10-28_to_2021-11-10 | -0.10 | 0.1132 |  | 0.91 | [0.73; 1.13] | 24.2% | 24.2% | 2021-11-11_to_2021-11-24 | 0.12  | 0.1355 |  | 1.13 | [0.87; 1.47] | 16.9% | 16.9% | 2021-11-25_to_2021-12-08 | 0.16  | 0.2098 |  | 1.18 | [0.78; 1.77] | 7.1%  | 7.1%  | 2021-12-09_to_2021-12-22 | -0.07 | 0.1450 |  | 0.94 | [0.70; 1.24] | 14.8% | 14.8% | 2021-12-23_to_2022-01-05 | -0.48 | 0.4862 |  | 0.62 | [0.24; 1.61] | 1.3% | 1.3% | <b>Common effect model</b> |  |  |  | <b>0.95</b> | <b>[0.85; 1.06]</b> | <b>100.0%</b> | <b>--</b> | <b>Random effects model</b> |  |  |  | <b>0.95</b> | <b>[0.85; 1.06]</b> | <b>--</b> | <b>100.0%</b> |
| Study                       | TE                                                                                          | seTE                                                                                                                                                                                                                                                                                                                                                                                                                                                                                                                                                                                                                                                                                                                                                                                                                                                                                                                                                                                                                                                                                                                                                                                                                                                                                                                                                                                                                                                                                                                                                                                                                                                                                                                                                                                                                                          | Hazard Ratio | HR          | 95%-CI              | Weight (common) | Weight (random) |        |                 |                 |                          |       |        |  |      |              |      |      |                          |       |        |  |      |              |       |       |                          |       |        |  |      |              |       |       |                          |       |        |  |      |              |       |       |                          |       |        |  |      |              |       |       |                          |       |        |  |      |              |       |       |                          |       |        |  |      |              |       |       |                          |       |        |  |      |              |      |      |                            |  |  |  |             |                     |               |           |                             |  |  |  |             |                     |           |               |
| 2021-09-16_to_2021-09-29    | -0.30                                                                                       | 0.3408                                                                                                                                                                                                                                                                                                                                                                                                                                                                                                                                                                                                                                                                                                                                                                                                                                                                                                                                                                                                                                                                                                                                                                                                                                                                                                                                                                                                                                                                                                                                                                                                                                                                                                                                                                                                                                        |              | 0.74        | [0.38; 1.44]        | 2.7%            | 2.7%            |        |                 |                 |                          |       |        |  |      |              |      |      |                          |       |        |  |      |              |       |       |                          |       |        |  |      |              |       |       |                          |       |        |  |      |              |       |       |                          |       |        |  |      |              |       |       |                          |       |        |  |      |              |       |       |                          |       |        |  |      |              |       |       |                          |       |        |  |      |              |      |      |                            |  |  |  |             |                     |               |           |                             |  |  |  |             |                     |           |               |
| 2021-09-30_to_2021-10-13    | 0.01                                                                                        | 0.1488                                                                                                                                                                                                                                                                                                                                                                                                                                                                                                                                                                                                                                                                                                                                                                                                                                                                                                                                                                                                                                                                                                                                                                                                                                                                                                                                                                                                                                                                                                                                                                                                                                                                                                                                                                                                                                        |              | 1.01        | [0.76; 1.36]        | 14.0%           | 14.0%           |        |                 |                 |                          |       |        |  |      |              |      |      |                          |       |        |  |      |              |       |       |                          |       |        |  |      |              |       |       |                          |       |        |  |      |              |       |       |                          |       |        |  |      |              |       |       |                          |       |        |  |      |              |       |       |                          |       |        |  |      |              |       |       |                          |       |        |  |      |              |      |      |                            |  |  |  |             |                     |               |           |                             |  |  |  |             |                     |           |               |
| 2021-10-14_to_2021-10-27    | -0.20                                                                                       | 0.1282                                                                                                                                                                                                                                                                                                                                                                                                                                                                                                                                                                                                                                                                                                                                                                                                                                                                                                                                                                                                                                                                                                                                                                                                                                                                                                                                                                                                                                                                                                                                                                                                                                                                                                                                                                                                                                        |              | 0.82        | [0.63; 1.05]        | 18.9%           | 18.9%           |        |                 |                 |                          |       |        |  |      |              |      |      |                          |       |        |  |      |              |       |       |                          |       |        |  |      |              |       |       |                          |       |        |  |      |              |       |       |                          |       |        |  |      |              |       |       |                          |       |        |  |      |              |       |       |                          |       |        |  |      |              |       |       |                          |       |        |  |      |              |      |      |                            |  |  |  |             |                     |               |           |                             |  |  |  |             |                     |           |               |
| 2021-10-28_to_2021-11-10    | -0.10                                                                                       | 0.1132                                                                                                                                                                                                                                                                                                                                                                                                                                                                                                                                                                                                                                                                                                                                                                                                                                                                                                                                                                                                                                                                                                                                                                                                                                                                                                                                                                                                                                                                                                                                                                                                                                                                                                                                                                                                                                        |              | 0.91        | [0.73; 1.13]        | 24.2%           | 24.2%           |        |                 |                 |                          |       |        |  |      |              |      |      |                          |       |        |  |      |              |       |       |                          |       |        |  |      |              |       |       |                          |       |        |  |      |              |       |       |                          |       |        |  |      |              |       |       |                          |       |        |  |      |              |       |       |                          |       |        |  |      |              |       |       |                          |       |        |  |      |              |      |      |                            |  |  |  |             |                     |               |           |                             |  |  |  |             |                     |           |               |
| 2021-11-11_to_2021-11-24    | 0.12                                                                                        | 0.1355                                                                                                                                                                                                                                                                                                                                                                                                                                                                                                                                                                                                                                                                                                                                                                                                                                                                                                                                                                                                                                                                                                                                                                                                                                                                                                                                                                                                                                                                                                                                                                                                                                                                                                                                                                                                                                        |              | 1.13        | [0.87; 1.47]        | 16.9%           | 16.9%           |        |                 |                 |                          |       |        |  |      |              |      |      |                          |       |        |  |      |              |       |       |                          |       |        |  |      |              |       |       |                          |       |        |  |      |              |       |       |                          |       |        |  |      |              |       |       |                          |       |        |  |      |              |       |       |                          |       |        |  |      |              |       |       |                          |       |        |  |      |              |      |      |                            |  |  |  |             |                     |               |           |                             |  |  |  |             |                     |           |               |
| 2021-11-25_to_2021-12-08    | 0.16                                                                                        | 0.2098                                                                                                                                                                                                                                                                                                                                                                                                                                                                                                                                                                                                                                                                                                                                                                                                                                                                                                                                                                                                                                                                                                                                                                                                                                                                                                                                                                                                                                                                                                                                                                                                                                                                                                                                                                                                                                        |              | 1.18        | [0.78; 1.77]        | 7.1%            | 7.1%            |        |                 |                 |                          |       |        |  |      |              |      |      |                          |       |        |  |      |              |       |       |                          |       |        |  |      |              |       |       |                          |       |        |  |      |              |       |       |                          |       |        |  |      |              |       |       |                          |       |        |  |      |              |       |       |                          |       |        |  |      |              |       |       |                          |       |        |  |      |              |      |      |                            |  |  |  |             |                     |               |           |                             |  |  |  |             |                     |           |               |
| 2021-12-09_to_2021-12-22    | -0.07                                                                                       | 0.1450                                                                                                                                                                                                                                                                                                                                                                                                                                                                                                                                                                                                                                                                                                                                                                                                                                                                                                                                                                                                                                                                                                                                                                                                                                                                                                                                                                                                                                                                                                                                                                                                                                                                                                                                                                                                                                        |              | 0.94        | [0.70; 1.24]        | 14.8%           | 14.8%           |        |                 |                 |                          |       |        |  |      |              |      |      |                          |       |        |  |      |              |       |       |                          |       |        |  |      |              |       |       |                          |       |        |  |      |              |       |       |                          |       |        |  |      |              |       |       |                          |       |        |  |      |              |       |       |                          |       |        |  |      |              |       |       |                          |       |        |  |      |              |      |      |                            |  |  |  |             |                     |               |           |                             |  |  |  |             |                     |           |               |
| 2021-12-23_to_2022-01-05    | -0.48                                                                                       | 0.4862                                                                                                                                                                                                                                                                                                                                                                                                                                                                                                                                                                                                                                                                                                                                                                                                                                                                                                                                                                                                                                                                                                                                                                                                                                                                                                                                                                                                                                                                                                                                                                                                                                                                                                                                                                                                                                        |              | 0.62        | [0.24; 1.61]        | 1.3%            | 1.3%            |        |                 |                 |                          |       |        |  |      |              |      |      |                          |       |        |  |      |              |       |       |                          |       |        |  |      |              |       |       |                          |       |        |  |      |              |       |       |                          |       |        |  |      |              |       |       |                          |       |        |  |      |              |       |       |                          |       |        |  |      |              |       |       |                          |       |        |  |      |              |      |      |                            |  |  |  |             |                     |               |           |                             |  |  |  |             |                     |           |               |
| <b>Common effect model</b>  |                                                                                             |                                                                                                                                                                                                                                                                                                                                                                                                                                                                                                                                                                                                                                                                                                                                                                                                                                                                                                                                                                                                                                                                                                                                                                                                                                                                                                                                                                                                                                                                                                                                                                                                                                                                                                                                                                                                                                               |              | <b>0.95</b> | <b>[0.85; 1.06]</b> | <b>100.0%</b>   | <b>--</b>       |        |                 |                 |                          |       |        |  |      |              |      |      |                          |       |        |  |      |              |       |       |                          |       |        |  |      |              |       |       |                          |       |        |  |      |              |       |       |                          |       |        |  |      |              |       |       |                          |       |        |  |      |              |       |       |                          |       |        |  |      |              |       |       |                          |       |        |  |      |              |      |      |                            |  |  |  |             |                     |               |           |                             |  |  |  |             |                     |           |               |
| <b>Random effects model</b> |                                                                                             |                                                                                                                                                                                                                                                                                                                                                                                                                                                                                                                                                                                                                                                                                                                                                                                                                                                                                                                                                                                                                                                                                                                                                                                                                                                                                                                                                                                                                                                                                                                                                                                                                                                                                                                                                                                                                                               |              | <b>0.95</b> | <b>[0.85; 1.06]</b> | <b>--</b>       | <b>100.0%</b>   |        |                 |                 |                          |       |        |  |      |              |      |      |                          |       |        |  |      |              |       |       |                          |       |        |  |      |              |       |       |                          |       |        |  |      |              |       |       |                          |       |        |  |      |              |       |       |                          |       |        |  |      |              |       |       |                          |       |        |  |      |              |       |       |                          |       |        |  |      |              |      |      |                            |  |  |  |             |                     |               |           |                             |  |  |  |             |                     |           |               |

|                             | <p>IMD Quintile 2 in reference to IMD Quintile 1</p> | <table border="1"> <thead> <tr> <th>Study</th> <th>TE</th> <th>seTE</th> <th>Hazard Ratio</th> <th>HR</th> <th>95%-CI</th> <th>Weight (common)</th> <th>Weight (random)</th> </tr> </thead> <tbody> <tr><td>2021-09-16_to_2021-09-29</td><td>0.39</td><td>0.5590</td><td></td><td>1.48</td><td>[0.50; 4.43]</td><td>3.3%</td><td>3.3%</td></tr> <tr><td>2021-09-30_to_2021-10-13</td><td>-0.08</td><td>0.3096</td><td></td><td>0.93</td><td>[0.50; 1.70]</td><td>10.8%</td><td>10.8%</td></tr> <tr><td>2021-10-14_to_2021-10-27</td><td>-0.26</td><td>0.2700</td><td></td><td>0.77</td><td>[0.45; 1.30]</td><td>14.3%</td><td>14.3%</td></tr> <tr><td>2021-10-28_to_2021-11-10</td><td>-0.35</td><td>0.2205</td><td></td><td>0.71</td><td>[0.46; 1.09]</td><td>21.4%</td><td>21.4%</td></tr> <tr><td>2021-11-11_to_2021-11-24</td><td>0.04</td><td>0.2602</td><td></td><td>1.04</td><td>[0.62; 1.73]</td><td>15.4%</td><td>15.4%</td></tr> <tr><td>2021-11-25_to_2021-12-08</td><td>-0.01</td><td>0.2655</td><td></td><td>0.99</td><td>[0.59; 1.66]</td><td>14.8%</td><td>14.8%</td></tr> <tr><td>2021-12-09_to_2021-12-22</td><td>-0.10</td><td>0.2403</td><td></td><td>0.91</td><td>[0.57; 1.45]</td><td>18.0%</td><td>18.0%</td></tr> <tr><td>2021-12-23_to_2022-01-05</td><td>-0.46</td><td>0.7076</td><td></td><td>0.63</td><td>[0.16; 2.52]</td><td>2.1%</td><td>2.1%</td></tr> <tr><td><b>Common effect model</b></td><td></td><td></td><td></td><td><b>0.88</b></td><td><b>[0.72; 1.07]</b></td><td><b>100.0%</b></td><td><b>--</b></td></tr> <tr><td><b>Random effects model</b></td><td></td><td></td><td></td><td><b>0.88</b></td><td><b>[0.72; 1.07]</b></td><td><b>--</b></td><td><b>100.0%</b></td></tr> </tbody> </table> <p>Heterogeneity: <math>I^2 = 0\%</math>, <math>\tau^2 = 0</math>, <math>p = 0.89</math></p>       | Study        | TE          | seTE                | Hazard Ratio    | HR              | 95%-CI | Weight (common) | Weight (random) | 2021-09-16_to_2021-09-29 | 0.39  | 0.5590 |  | 1.48 | [0.50; 4.43] | 3.3% | 3.3% | 2021-09-30_to_2021-10-13 | -0.08 | 0.3096 |  | 0.93 | [0.50; 1.70] | 10.8% | 10.8% | 2021-10-14_to_2021-10-27 | -0.26 | 0.2700 |  | 0.77 | [0.45; 1.30] | 14.3% | 14.3% | 2021-10-28_to_2021-11-10 | -0.35 | 0.2205 |  | 0.71 | [0.46; 1.09] | 21.4% | 21.4% | 2021-11-11_to_2021-11-24 | 0.04  | 0.2602 |  | 1.04 | [0.62; 1.73] | 15.4% | 15.4% | 2021-11-25_to_2021-12-08 | -0.01 | 0.2655 |  | 0.99 | [0.59; 1.66] | 14.8% | 14.8% | 2021-12-09_to_2021-12-22 | -0.10 | 0.2403 |  | 0.91 | [0.57; 1.45] | 18.0% | 18.0% | 2021-12-23_to_2022-01-05 | -0.46 | 0.7076 |  | 0.63 | [0.16; 2.52] | 2.1% | 2.1% | <b>Common effect model</b> |  |  |  | <b>0.88</b> | <b>[0.72; 1.07]</b> | <b>100.0%</b> | <b>--</b> | <b>Random effects model</b> |  |  |  | <b>0.88</b> | <b>[0.72; 1.07]</b> | <b>--</b> | <b>100.0%</b> |
|-----------------------------|------------------------------------------------------|---------------------------------------------------------------------------------------------------------------------------------------------------------------------------------------------------------------------------------------------------------------------------------------------------------------------------------------------------------------------------------------------------------------------------------------------------------------------------------------------------------------------------------------------------------------------------------------------------------------------------------------------------------------------------------------------------------------------------------------------------------------------------------------------------------------------------------------------------------------------------------------------------------------------------------------------------------------------------------------------------------------------------------------------------------------------------------------------------------------------------------------------------------------------------------------------------------------------------------------------------------------------------------------------------------------------------------------------------------------------------------------------------------------------------------------------------------------------------------------------------------------------------------------------------------------------------------------------------------------------------------------------------------------------------------------------------------------------------------------------------------------------------------------------------------------------------------------------|--------------|-------------|---------------------|-----------------|-----------------|--------|-----------------|-----------------|--------------------------|-------|--------|--|------|--------------|------|------|--------------------------|-------|--------|--|------|--------------|-------|-------|--------------------------|-------|--------|--|------|--------------|-------|-------|--------------------------|-------|--------|--|------|--------------|-------|-------|--------------------------|-------|--------|--|------|--------------|-------|-------|--------------------------|-------|--------|--|------|--------------|-------|-------|--------------------------|-------|--------|--|------|--------------|-------|-------|--------------------------|-------|--------|--|------|--------------|------|------|----------------------------|--|--|--|-------------|---------------------|---------------|-----------|-----------------------------|--|--|--|-------------|---------------------|-----------|---------------|
| Study                       | TE                                                   | seTE                                                                                                                                                                                                                                                                                                                                                                                                                                                                                                                                                                                                                                                                                                                                                                                                                                                                                                                                                                                                                                                                                                                                                                                                                                                                                                                                                                                                                                                                                                                                                                                                                                                                                                                                                                                                                                        | Hazard Ratio | HR          | 95%-CI              | Weight (common) | Weight (random) |        |                 |                 |                          |       |        |  |      |              |      |      |                          |       |        |  |      |              |       |       |                          |       |        |  |      |              |       |       |                          |       |        |  |      |              |       |       |                          |       |        |  |      |              |       |       |                          |       |        |  |      |              |       |       |                          |       |        |  |      |              |       |       |                          |       |        |  |      |              |      |      |                            |  |  |  |             |                     |               |           |                             |  |  |  |             |                     |           |               |
| 2021-09-16_to_2021-09-29    | 0.39                                                 | 0.5590                                                                                                                                                                                                                                                                                                                                                                                                                                                                                                                                                                                                                                                                                                                                                                                                                                                                                                                                                                                                                                                                                                                                                                                                                                                                                                                                                                                                                                                                                                                                                                                                                                                                                                                                                                                                                                      |              | 1.48        | [0.50; 4.43]        | 3.3%            | 3.3%            |        |                 |                 |                          |       |        |  |      |              |      |      |                          |       |        |  |      |              |       |       |                          |       |        |  |      |              |       |       |                          |       |        |  |      |              |       |       |                          |       |        |  |      |              |       |       |                          |       |        |  |      |              |       |       |                          |       |        |  |      |              |       |       |                          |       |        |  |      |              |      |      |                            |  |  |  |             |                     |               |           |                             |  |  |  |             |                     |           |               |
| 2021-09-30_to_2021-10-13    | -0.08                                                | 0.3096                                                                                                                                                                                                                                                                                                                                                                                                                                                                                                                                                                                                                                                                                                                                                                                                                                                                                                                                                                                                                                                                                                                                                                                                                                                                                                                                                                                                                                                                                                                                                                                                                                                                                                                                                                                                                                      |              | 0.93        | [0.50; 1.70]        | 10.8%           | 10.8%           |        |                 |                 |                          |       |        |  |      |              |      |      |                          |       |        |  |      |              |       |       |                          |       |        |  |      |              |       |       |                          |       |        |  |      |              |       |       |                          |       |        |  |      |              |       |       |                          |       |        |  |      |              |       |       |                          |       |        |  |      |              |       |       |                          |       |        |  |      |              |      |      |                            |  |  |  |             |                     |               |           |                             |  |  |  |             |                     |           |               |
| 2021-10-14_to_2021-10-27    | -0.26                                                | 0.2700                                                                                                                                                                                                                                                                                                                                                                                                                                                                                                                                                                                                                                                                                                                                                                                                                                                                                                                                                                                                                                                                                                                                                                                                                                                                                                                                                                                                                                                                                                                                                                                                                                                                                                                                                                                                                                      |              | 0.77        | [0.45; 1.30]        | 14.3%           | 14.3%           |        |                 |                 |                          |       |        |  |      |              |      |      |                          |       |        |  |      |              |       |       |                          |       |        |  |      |              |       |       |                          |       |        |  |      |              |       |       |                          |       |        |  |      |              |       |       |                          |       |        |  |      |              |       |       |                          |       |        |  |      |              |       |       |                          |       |        |  |      |              |      |      |                            |  |  |  |             |                     |               |           |                             |  |  |  |             |                     |           |               |
| 2021-10-28_to_2021-11-10    | -0.35                                                | 0.2205                                                                                                                                                                                                                                                                                                                                                                                                                                                                                                                                                                                                                                                                                                                                                                                                                                                                                                                                                                                                                                                                                                                                                                                                                                                                                                                                                                                                                                                                                                                                                                                                                                                                                                                                                                                                                                      |              | 0.71        | [0.46; 1.09]        | 21.4%           | 21.4%           |        |                 |                 |                          |       |        |  |      |              |      |      |                          |       |        |  |      |              |       |       |                          |       |        |  |      |              |       |       |                          |       |        |  |      |              |       |       |                          |       |        |  |      |              |       |       |                          |       |        |  |      |              |       |       |                          |       |        |  |      |              |       |       |                          |       |        |  |      |              |      |      |                            |  |  |  |             |                     |               |           |                             |  |  |  |             |                     |           |               |
| 2021-11-11_to_2021-11-24    | 0.04                                                 | 0.2602                                                                                                                                                                                                                                                                                                                                                                                                                                                                                                                                                                                                                                                                                                                                                                                                                                                                                                                                                                                                                                                                                                                                                                                                                                                                                                                                                                                                                                                                                                                                                                                                                                                                                                                                                                                                                                      |              | 1.04        | [0.62; 1.73]        | 15.4%           | 15.4%           |        |                 |                 |                          |       |        |  |      |              |      |      |                          |       |        |  |      |              |       |       |                          |       |        |  |      |              |       |       |                          |       |        |  |      |              |       |       |                          |       |        |  |      |              |       |       |                          |       |        |  |      |              |       |       |                          |       |        |  |      |              |       |       |                          |       |        |  |      |              |      |      |                            |  |  |  |             |                     |               |           |                             |  |  |  |             |                     |           |               |
| 2021-11-25_to_2021-12-08    | -0.01                                                | 0.2655                                                                                                                                                                                                                                                                                                                                                                                                                                                                                                                                                                                                                                                                                                                                                                                                                                                                                                                                                                                                                                                                                                                                                                                                                                                                                                                                                                                                                                                                                                                                                                                                                                                                                                                                                                                                                                      |              | 0.99        | [0.59; 1.66]        | 14.8%           | 14.8%           |        |                 |                 |                          |       |        |  |      |              |      |      |                          |       |        |  |      |              |       |       |                          |       |        |  |      |              |       |       |                          |       |        |  |      |              |       |       |                          |       |        |  |      |              |       |       |                          |       |        |  |      |              |       |       |                          |       |        |  |      |              |       |       |                          |       |        |  |      |              |      |      |                            |  |  |  |             |                     |               |           |                             |  |  |  |             |                     |           |               |
| 2021-12-09_to_2021-12-22    | -0.10                                                | 0.2403                                                                                                                                                                                                                                                                                                                                                                                                                                                                                                                                                                                                                                                                                                                                                                                                                                                                                                                                                                                                                                                                                                                                                                                                                                                                                                                                                                                                                                                                                                                                                                                                                                                                                                                                                                                                                                      |              | 0.91        | [0.57; 1.45]        | 18.0%           | 18.0%           |        |                 |                 |                          |       |        |  |      |              |      |      |                          |       |        |  |      |              |       |       |                          |       |        |  |      |              |       |       |                          |       |        |  |      |              |       |       |                          |       |        |  |      |              |       |       |                          |       |        |  |      |              |       |       |                          |       |        |  |      |              |       |       |                          |       |        |  |      |              |      |      |                            |  |  |  |             |                     |               |           |                             |  |  |  |             |                     |           |               |
| 2021-12-23_to_2022-01-05    | -0.46                                                | 0.7076                                                                                                                                                                                                                                                                                                                                                                                                                                                                                                                                                                                                                                                                                                                                                                                                                                                                                                                                                                                                                                                                                                                                                                                                                                                                                                                                                                                                                                                                                                                                                                                                                                                                                                                                                                                                                                      |              | 0.63        | [0.16; 2.52]        | 2.1%            | 2.1%            |        |                 |                 |                          |       |        |  |      |              |      |      |                          |       |        |  |      |              |       |       |                          |       |        |  |      |              |       |       |                          |       |        |  |      |              |       |       |                          |       |        |  |      |              |       |       |                          |       |        |  |      |              |       |       |                          |       |        |  |      |              |       |       |                          |       |        |  |      |              |      |      |                            |  |  |  |             |                     |               |           |                             |  |  |  |             |                     |           |               |
| <b>Common effect model</b>  |                                                      |                                                                                                                                                                                                                                                                                                                                                                                                                                                                                                                                                                                                                                                                                                                                                                                                                                                                                                                                                                                                                                                                                                                                                                                                                                                                                                                                                                                                                                                                                                                                                                                                                                                                                                                                                                                                                                             |              | <b>0.88</b> | <b>[0.72; 1.07]</b> | <b>100.0%</b>   | <b>--</b>       |        |                 |                 |                          |       |        |  |      |              |      |      |                          |       |        |  |      |              |       |       |                          |       |        |  |      |              |       |       |                          |       |        |  |      |              |       |       |                          |       |        |  |      |              |       |       |                          |       |        |  |      |              |       |       |                          |       |        |  |      |              |       |       |                          |       |        |  |      |              |      |      |                            |  |  |  |             |                     |               |           |                             |  |  |  |             |                     |           |               |
| <b>Random effects model</b> |                                                      |                                                                                                                                                                                                                                                                                                                                                                                                                                                                                                                                                                                                                                                                                                                                                                                                                                                                                                                                                                                                                                                                                                                                                                                                                                                                                                                                                                                                                                                                                                                                                                                                                                                                                                                                                                                                                                             |              | <b>0.88</b> | <b>[0.72; 1.07]</b> | <b>--</b>       | <b>100.0%</b>   |        |                 |                 |                          |       |        |  |      |              |      |      |                          |       |        |  |      |              |       |       |                          |       |        |  |      |              |       |       |                          |       |        |  |      |              |       |       |                          |       |        |  |      |              |       |       |                          |       |        |  |      |              |       |       |                          |       |        |  |      |              |       |       |                          |       |        |  |      |              |      |      |                            |  |  |  |             |                     |               |           |                             |  |  |  |             |                     |           |               |
|                             | <p>IMD Quintile 3 in reference to IMD Quintile 1</p> | <table border="1"> <thead> <tr> <th>Study</th> <th>TE</th> <th>seTE</th> <th>Hazard Ratio</th> <th>HR</th> <th>95%-CI</th> <th>Weight (common)</th> <th>Weight (random)</th> </tr> </thead> <tbody> <tr><td>2021-09-16_to_2021-09-29</td><td>-0.13</td><td>0.5718</td><td></td><td>0.88</td><td>[0.29; 2.70]</td><td>3.1%</td><td>3.1%</td></tr> <tr><td>2021-09-30_to_2021-10-13</td><td>-0.20</td><td>0.2895</td><td></td><td>0.82</td><td>[0.46; 1.45]</td><td>12.0%</td><td>12.0%</td></tr> <tr><td>2021-10-14_to_2021-10-27</td><td>-0.32</td><td>0.2504</td><td></td><td>0.73</td><td>[0.45; 1.19]</td><td>16.0%</td><td>16.0%</td></tr> <tr><td>2021-10-28_to_2021-11-10</td><td>-0.63</td><td>0.2136</td><td></td><td>0.53</td><td>[0.35; 0.81]</td><td>22.0%</td><td>22.0%</td></tr> <tr><td>2021-11-11_to_2021-11-24</td><td>-0.23</td><td>0.2504</td><td></td><td>0.80</td><td>[0.49; 1.30]</td><td>16.0%</td><td>16.0%</td></tr> <tr><td>2021-11-25_to_2021-12-08</td><td>-0.40</td><td>0.2706</td><td></td><td>0.67</td><td>[0.39; 1.14]</td><td>13.7%</td><td>13.7%</td></tr> <tr><td>2021-12-09_to_2021-12-22</td><td>-0.43</td><td>0.2511</td><td></td><td>0.65</td><td>[0.40; 1.07]</td><td>15.9%</td><td>15.9%</td></tr> <tr><td>2021-12-23_to_2022-01-05</td><td>-1.23</td><td>0.8661</td><td></td><td>0.29</td><td>[0.05; 1.60]</td><td>1.3%</td><td>1.3%</td></tr> <tr><td><b>Common effect model</b></td><td></td><td></td><td></td><td><b>0.67</b></td><td><b>[0.55; 0.82]</b></td><td><b>100.0%</b></td><td><b>--</b></td></tr> <tr><td><b>Random effects model</b></td><td></td><td></td><td></td><td><b>0.67</b></td><td><b>[0.55; 0.82]</b></td><td><b>--</b></td><td><b>100.0%</b></td></tr> </tbody> </table> <p>Heterogeneity: <math>I^2 = 0\%</math>, <math>\tau^2 = 0</math>, <math>p = 0.85</math></p>     | Study        | TE          | seTE                | Hazard Ratio    | HR              | 95%-CI | Weight (common) | Weight (random) | 2021-09-16_to_2021-09-29 | -0.13 | 0.5718 |  | 0.88 | [0.29; 2.70] | 3.1% | 3.1% | 2021-09-30_to_2021-10-13 | -0.20 | 0.2895 |  | 0.82 | [0.46; 1.45] | 12.0% | 12.0% | 2021-10-14_to_2021-10-27 | -0.32 | 0.2504 |  | 0.73 | [0.45; 1.19] | 16.0% | 16.0% | 2021-10-28_to_2021-11-10 | -0.63 | 0.2136 |  | 0.53 | [0.35; 0.81] | 22.0% | 22.0% | 2021-11-11_to_2021-11-24 | -0.23 | 0.2504 |  | 0.80 | [0.49; 1.30] | 16.0% | 16.0% | 2021-11-25_to_2021-12-08 | -0.40 | 0.2706 |  | 0.67 | [0.39; 1.14] | 13.7% | 13.7% | 2021-12-09_to_2021-12-22 | -0.43 | 0.2511 |  | 0.65 | [0.40; 1.07] | 15.9% | 15.9% | 2021-12-23_to_2022-01-05 | -1.23 | 0.8661 |  | 0.29 | [0.05; 1.60] | 1.3% | 1.3% | <b>Common effect model</b> |  |  |  | <b>0.67</b> | <b>[0.55; 0.82]</b> | <b>100.0%</b> | <b>--</b> | <b>Random effects model</b> |  |  |  | <b>0.67</b> | <b>[0.55; 0.82]</b> | <b>--</b> | <b>100.0%</b> |
| Study                       | TE                                                   | seTE                                                                                                                                                                                                                                                                                                                                                                                                                                                                                                                                                                                                                                                                                                                                                                                                                                                                                                                                                                                                                                                                                                                                                                                                                                                                                                                                                                                                                                                                                                                                                                                                                                                                                                                                                                                                                                        | Hazard Ratio | HR          | 95%-CI              | Weight (common) | Weight (random) |        |                 |                 |                          |       |        |  |      |              |      |      |                          |       |        |  |      |              |       |       |                          |       |        |  |      |              |       |       |                          |       |        |  |      |              |       |       |                          |       |        |  |      |              |       |       |                          |       |        |  |      |              |       |       |                          |       |        |  |      |              |       |       |                          |       |        |  |      |              |      |      |                            |  |  |  |             |                     |               |           |                             |  |  |  |             |                     |           |               |
| 2021-09-16_to_2021-09-29    | -0.13                                                | 0.5718                                                                                                                                                                                                                                                                                                                                                                                                                                                                                                                                                                                                                                                                                                                                                                                                                                                                                                                                                                                                                                                                                                                                                                                                                                                                                                                                                                                                                                                                                                                                                                                                                                                                                                                                                                                                                                      |              | 0.88        | [0.29; 2.70]        | 3.1%            | 3.1%            |        |                 |                 |                          |       |        |  |      |              |      |      |                          |       |        |  |      |              |       |       |                          |       |        |  |      |              |       |       |                          |       |        |  |      |              |       |       |                          |       |        |  |      |              |       |       |                          |       |        |  |      |              |       |       |                          |       |        |  |      |              |       |       |                          |       |        |  |      |              |      |      |                            |  |  |  |             |                     |               |           |                             |  |  |  |             |                     |           |               |
| 2021-09-30_to_2021-10-13    | -0.20                                                | 0.2895                                                                                                                                                                                                                                                                                                                                                                                                                                                                                                                                                                                                                                                                                                                                                                                                                                                                                                                                                                                                                                                                                                                                                                                                                                                                                                                                                                                                                                                                                                                                                                                                                                                                                                                                                                                                                                      |              | 0.82        | [0.46; 1.45]        | 12.0%           | 12.0%           |        |                 |                 |                          |       |        |  |      |              |      |      |                          |       |        |  |      |              |       |       |                          |       |        |  |      |              |       |       |                          |       |        |  |      |              |       |       |                          |       |        |  |      |              |       |       |                          |       |        |  |      |              |       |       |                          |       |        |  |      |              |       |       |                          |       |        |  |      |              |      |      |                            |  |  |  |             |                     |               |           |                             |  |  |  |             |                     |           |               |
| 2021-10-14_to_2021-10-27    | -0.32                                                | 0.2504                                                                                                                                                                                                                                                                                                                                                                                                                                                                                                                                                                                                                                                                                                                                                                                                                                                                                                                                                                                                                                                                                                                                                                                                                                                                                                                                                                                                                                                                                                                                                                                                                                                                                                                                                                                                                                      |              | 0.73        | [0.45; 1.19]        | 16.0%           | 16.0%           |        |                 |                 |                          |       |        |  |      |              |      |      |                          |       |        |  |      |              |       |       |                          |       |        |  |      |              |       |       |                          |       |        |  |      |              |       |       |                          |       |        |  |      |              |       |       |                          |       |        |  |      |              |       |       |                          |       |        |  |      |              |       |       |                          |       |        |  |      |              |      |      |                            |  |  |  |             |                     |               |           |                             |  |  |  |             |                     |           |               |
| 2021-10-28_to_2021-11-10    | -0.63                                                | 0.2136                                                                                                                                                                                                                                                                                                                                                                                                                                                                                                                                                                                                                                                                                                                                                                                                                                                                                                                                                                                                                                                                                                                                                                                                                                                                                                                                                                                                                                                                                                                                                                                                                                                                                                                                                                                                                                      |              | 0.53        | [0.35; 0.81]        | 22.0%           | 22.0%           |        |                 |                 |                          |       |        |  |      |              |      |      |                          |       |        |  |      |              |       |       |                          |       |        |  |      |              |       |       |                          |       |        |  |      |              |       |       |                          |       |        |  |      |              |       |       |                          |       |        |  |      |              |       |       |                          |       |        |  |      |              |       |       |                          |       |        |  |      |              |      |      |                            |  |  |  |             |                     |               |           |                             |  |  |  |             |                     |           |               |
| 2021-11-11_to_2021-11-24    | -0.23                                                | 0.2504                                                                                                                                                                                                                                                                                                                                                                                                                                                                                                                                                                                                                                                                                                                                                                                                                                                                                                                                                                                                                                                                                                                                                                                                                                                                                                                                                                                                                                                                                                                                                                                                                                                                                                                                                                                                                                      |              | 0.80        | [0.49; 1.30]        | 16.0%           | 16.0%           |        |                 |                 |                          |       |        |  |      |              |      |      |                          |       |        |  |      |              |       |       |                          |       |        |  |      |              |       |       |                          |       |        |  |      |              |       |       |                          |       |        |  |      |              |       |       |                          |       |        |  |      |              |       |       |                          |       |        |  |      |              |       |       |                          |       |        |  |      |              |      |      |                            |  |  |  |             |                     |               |           |                             |  |  |  |             |                     |           |               |
| 2021-11-25_to_2021-12-08    | -0.40                                                | 0.2706                                                                                                                                                                                                                                                                                                                                                                                                                                                                                                                                                                                                                                                                                                                                                                                                                                                                                                                                                                                                                                                                                                                                                                                                                                                                                                                                                                                                                                                                                                                                                                                                                                                                                                                                                                                                                                      |              | 0.67        | [0.39; 1.14]        | 13.7%           | 13.7%           |        |                 |                 |                          |       |        |  |      |              |      |      |                          |       |        |  |      |              |       |       |                          |       |        |  |      |              |       |       |                          |       |        |  |      |              |       |       |                          |       |        |  |      |              |       |       |                          |       |        |  |      |              |       |       |                          |       |        |  |      |              |       |       |                          |       |        |  |      |              |      |      |                            |  |  |  |             |                     |               |           |                             |  |  |  |             |                     |           |               |
| 2021-12-09_to_2021-12-22    | -0.43                                                | 0.2511                                                                                                                                                                                                                                                                                                                                                                                                                                                                                                                                                                                                                                                                                                                                                                                                                                                                                                                                                                                                                                                                                                                                                                                                                                                                                                                                                                                                                                                                                                                                                                                                                                                                                                                                                                                                                                      |              | 0.65        | [0.40; 1.07]        | 15.9%           | 15.9%           |        |                 |                 |                          |       |        |  |      |              |      |      |                          |       |        |  |      |              |       |       |                          |       |        |  |      |              |       |       |                          |       |        |  |      |              |       |       |                          |       |        |  |      |              |       |       |                          |       |        |  |      |              |       |       |                          |       |        |  |      |              |       |       |                          |       |        |  |      |              |      |      |                            |  |  |  |             |                     |               |           |                             |  |  |  |             |                     |           |               |
| 2021-12-23_to_2022-01-05    | -1.23                                                | 0.8661                                                                                                                                                                                                                                                                                                                                                                                                                                                                                                                                                                                                                                                                                                                                                                                                                                                                                                                                                                                                                                                                                                                                                                                                                                                                                                                                                                                                                                                                                                                                                                                                                                                                                                                                                                                                                                      |              | 0.29        | [0.05; 1.60]        | 1.3%            | 1.3%            |        |                 |                 |                          |       |        |  |      |              |      |      |                          |       |        |  |      |              |       |       |                          |       |        |  |      |              |       |       |                          |       |        |  |      |              |       |       |                          |       |        |  |      |              |       |       |                          |       |        |  |      |              |       |       |                          |       |        |  |      |              |       |       |                          |       |        |  |      |              |      |      |                            |  |  |  |             |                     |               |           |                             |  |  |  |             |                     |           |               |
| <b>Common effect model</b>  |                                                      |                                                                                                                                                                                                                                                                                                                                                                                                                                                                                                                                                                                                                                                                                                                                                                                                                                                                                                                                                                                                                                                                                                                                                                                                                                                                                                                                                                                                                                                                                                                                                                                                                                                                                                                                                                                                                                             |              | <b>0.67</b> | <b>[0.55; 0.82]</b> | <b>100.0%</b>   | <b>--</b>       |        |                 |                 |                          |       |        |  |      |              |      |      |                          |       |        |  |      |              |       |       |                          |       |        |  |      |              |       |       |                          |       |        |  |      |              |       |       |                          |       |        |  |      |              |       |       |                          |       |        |  |      |              |       |       |                          |       |        |  |      |              |       |       |                          |       |        |  |      |              |      |      |                            |  |  |  |             |                     |               |           |                             |  |  |  |             |                     |           |               |
| <b>Random effects model</b> |                                                      |                                                                                                                                                                                                                                                                                                                                                                                                                                                                                                                                                                                                                                                                                                                                                                                                                                                                                                                                                                                                                                                                                                                                                                                                                                                                                                                                                                                                                                                                                                                                                                                                                                                                                                                                                                                                                                             |              | <b>0.67</b> | <b>[0.55; 0.82]</b> | <b>--</b>       | <b>100.0%</b>   |        |                 |                 |                          |       |        |  |      |              |      |      |                          |       |        |  |      |              |       |       |                          |       |        |  |      |              |       |       |                          |       |        |  |      |              |       |       |                          |       |        |  |      |              |       |       |                          |       |        |  |      |              |       |       |                          |       |        |  |      |              |       |       |                          |       |        |  |      |              |      |      |                            |  |  |  |             |                     |               |           |                             |  |  |  |             |                     |           |               |
|                             | <p>IMD Quintile 4 in reference to IMD Quintile 1</p> | <table border="1"> <thead> <tr> <th>Study</th> <th>TE</th> <th>seTE</th> <th>Hazard Ratio</th> <th>HR</th> <th>95%-CI</th> <th>Weight (common)</th> <th>Weight (random)</th> </tr> </thead> <tbody> <tr><td>2021-09-16_to_2021-09-29</td><td>0.08</td><td>0.5401</td><td></td><td>1.08</td><td>[0.37; 3.11]</td><td>3.1%</td><td>4.3%</td></tr> <tr><td>2021-09-30_to_2021-10-13</td><td>-0.13</td><td>0.2775</td><td></td><td>0.88</td><td>[0.51; 1.51]</td><td>11.8%</td><td>12.8%</td></tr> <tr><td>2021-10-14_to_2021-10-27</td><td>-0.42</td><td>0.2452</td><td></td><td>0.66</td><td>[0.41; 1.07]</td><td>15.1%</td><td>15.2%</td></tr> <tr><td>2021-10-28_to_2021-11-10</td><td>-0.80</td><td>0.2078</td><td></td><td>0.45</td><td>[0.30; 0.68]</td><td>21.1%</td><td>18.7%</td></tr> <tr><td>2021-11-11_to_2021-11-24</td><td>0.00</td><td>0.2395</td><td></td><td>1.00</td><td>[0.63; 1.60]</td><td>15.9%</td><td>15.7%</td></tr> <tr><td>2021-11-25_to_2021-12-08</td><td>-0.23</td><td>0.2517</td><td></td><td>0.80</td><td>[0.49; 1.30]</td><td>14.4%</td><td>14.7%</td></tr> <tr><td>2021-12-09_to_2021-12-22</td><td>-0.34</td><td>0.2318</td><td></td><td>0.71</td><td>[0.45; 1.12]</td><td>17.0%</td><td>16.4%</td></tr> <tr><td>2021-12-23_to_2022-01-05</td><td>-0.98</td><td>0.7639</td><td></td><td>0.37</td><td>[0.08; 1.67]</td><td>1.6%</td><td>2.3%</td></tr> <tr><td><b>Common effect model</b></td><td></td><td></td><td></td><td><b>0.70</b></td><td><b>[0.58; 0.85]</b></td><td><b>100.0%</b></td><td><b>--</b></td></tr> <tr><td><b>Random effects model</b></td><td></td><td></td><td></td><td><b>0.71</b></td><td><b>[0.57; 0.90]</b></td><td><b>--</b></td><td><b>100.0%</b></td></tr> </tbody> </table> <p>Heterogeneity: <math>I^2 = 22\%</math>, <math>\tau^2 = 0.0312</math>, <math>p = 0.25</math></p> | Study        | TE          | seTE                | Hazard Ratio    | HR              | 95%-CI | Weight (common) | Weight (random) | 2021-09-16_to_2021-09-29 | 0.08  | 0.5401 |  | 1.08 | [0.37; 3.11] | 3.1% | 4.3% | 2021-09-30_to_2021-10-13 | -0.13 | 0.2775 |  | 0.88 | [0.51; 1.51] | 11.8% | 12.8% | 2021-10-14_to_2021-10-27 | -0.42 | 0.2452 |  | 0.66 | [0.41; 1.07] | 15.1% | 15.2% | 2021-10-28_to_2021-11-10 | -0.80 | 0.2078 |  | 0.45 | [0.30; 0.68] | 21.1% | 18.7% | 2021-11-11_to_2021-11-24 | 0.00  | 0.2395 |  | 1.00 | [0.63; 1.60] | 15.9% | 15.7% | 2021-11-25_to_2021-12-08 | -0.23 | 0.2517 |  | 0.80 | [0.49; 1.30] | 14.4% | 14.7% | 2021-12-09_to_2021-12-22 | -0.34 | 0.2318 |  | 0.71 | [0.45; 1.12] | 17.0% | 16.4% | 2021-12-23_to_2022-01-05 | -0.98 | 0.7639 |  | 0.37 | [0.08; 1.67] | 1.6% | 2.3% | <b>Common effect model</b> |  |  |  | <b>0.70</b> | <b>[0.58; 0.85]</b> | <b>100.0%</b> | <b>--</b> | <b>Random effects model</b> |  |  |  | <b>0.71</b> | <b>[0.57; 0.90]</b> | <b>--</b> | <b>100.0%</b> |
| Study                       | TE                                                   | seTE                                                                                                                                                                                                                                                                                                                                                                                                                                                                                                                                                                                                                                                                                                                                                                                                                                                                                                                                                                                                                                                                                                                                                                                                                                                                                                                                                                                                                                                                                                                                                                                                                                                                                                                                                                                                                                        | Hazard Ratio | HR          | 95%-CI              | Weight (common) | Weight (random) |        |                 |                 |                          |       |        |  |      |              |      |      |                          |       |        |  |      |              |       |       |                          |       |        |  |      |              |       |       |                          |       |        |  |      |              |       |       |                          |       |        |  |      |              |       |       |                          |       |        |  |      |              |       |       |                          |       |        |  |      |              |       |       |                          |       |        |  |      |              |      |      |                            |  |  |  |             |                     |               |           |                             |  |  |  |             |                     |           |               |
| 2021-09-16_to_2021-09-29    | 0.08                                                 | 0.5401                                                                                                                                                                                                                                                                                                                                                                                                                                                                                                                                                                                                                                                                                                                                                                                                                                                                                                                                                                                                                                                                                                                                                                                                                                                                                                                                                                                                                                                                                                                                                                                                                                                                                                                                                                                                                                      |              | 1.08        | [0.37; 3.11]        | 3.1%            | 4.3%            |        |                 |                 |                          |       |        |  |      |              |      |      |                          |       |        |  |      |              |       |       |                          |       |        |  |      |              |       |       |                          |       |        |  |      |              |       |       |                          |       |        |  |      |              |       |       |                          |       |        |  |      |              |       |       |                          |       |        |  |      |              |       |       |                          |       |        |  |      |              |      |      |                            |  |  |  |             |                     |               |           |                             |  |  |  |             |                     |           |               |
| 2021-09-30_to_2021-10-13    | -0.13                                                | 0.2775                                                                                                                                                                                                                                                                                                                                                                                                                                                                                                                                                                                                                                                                                                                                                                                                                                                                                                                                                                                                                                                                                                                                                                                                                                                                                                                                                                                                                                                                                                                                                                                                                                                                                                                                                                                                                                      |              | 0.88        | [0.51; 1.51]        | 11.8%           | 12.8%           |        |                 |                 |                          |       |        |  |      |              |      |      |                          |       |        |  |      |              |       |       |                          |       |        |  |      |              |       |       |                          |       |        |  |      |              |       |       |                          |       |        |  |      |              |       |       |                          |       |        |  |      |              |       |       |                          |       |        |  |      |              |       |       |                          |       |        |  |      |              |      |      |                            |  |  |  |             |                     |               |           |                             |  |  |  |             |                     |           |               |
| 2021-10-14_to_2021-10-27    | -0.42                                                | 0.2452                                                                                                                                                                                                                                                                                                                                                                                                                                                                                                                                                                                                                                                                                                                                                                                                                                                                                                                                                                                                                                                                                                                                                                                                                                                                                                                                                                                                                                                                                                                                                                                                                                                                                                                                                                                                                                      |              | 0.66        | [0.41; 1.07]        | 15.1%           | 15.2%           |        |                 |                 |                          |       |        |  |      |              |      |      |                          |       |        |  |      |              |       |       |                          |       |        |  |      |              |       |       |                          |       |        |  |      |              |       |       |                          |       |        |  |      |              |       |       |                          |       |        |  |      |              |       |       |                          |       |        |  |      |              |       |       |                          |       |        |  |      |              |      |      |                            |  |  |  |             |                     |               |           |                             |  |  |  |             |                     |           |               |
| 2021-10-28_to_2021-11-10    | -0.80                                                | 0.2078                                                                                                                                                                                                                                                                                                                                                                                                                                                                                                                                                                                                                                                                                                                                                                                                                                                                                                                                                                                                                                                                                                                                                                                                                                                                                                                                                                                                                                                                                                                                                                                                                                                                                                                                                                                                                                      |              | 0.45        | [0.30; 0.68]        | 21.1%           | 18.7%           |        |                 |                 |                          |       |        |  |      |              |      |      |                          |       |        |  |      |              |       |       |                          |       |        |  |      |              |       |       |                          |       |        |  |      |              |       |       |                          |       |        |  |      |              |       |       |                          |       |        |  |      |              |       |       |                          |       |        |  |      |              |       |       |                          |       |        |  |      |              |      |      |                            |  |  |  |             |                     |               |           |                             |  |  |  |             |                     |           |               |
| 2021-11-11_to_2021-11-24    | 0.00                                                 | 0.2395                                                                                                                                                                                                                                                                                                                                                                                                                                                                                                                                                                                                                                                                                                                                                                                                                                                                                                                                                                                                                                                                                                                                                                                                                                                                                                                                                                                                                                                                                                                                                                                                                                                                                                                                                                                                                                      |              | 1.00        | [0.63; 1.60]        | 15.9%           | 15.7%           |        |                 |                 |                          |       |        |  |      |              |      |      |                          |       |        |  |      |              |       |       |                          |       |        |  |      |              |       |       |                          |       |        |  |      |              |       |       |                          |       |        |  |      |              |       |       |                          |       |        |  |      |              |       |       |                          |       |        |  |      |              |       |       |                          |       |        |  |      |              |      |      |                            |  |  |  |             |                     |               |           |                             |  |  |  |             |                     |           |               |
| 2021-11-25_to_2021-12-08    | -0.23                                                | 0.2517                                                                                                                                                                                                                                                                                                                                                                                                                                                                                                                                                                                                                                                                                                                                                                                                                                                                                                                                                                                                                                                                                                                                                                                                                                                                                                                                                                                                                                                                                                                                                                                                                                                                                                                                                                                                                                      |              | 0.80        | [0.49; 1.30]        | 14.4%           | 14.7%           |        |                 |                 |                          |       |        |  |      |              |      |      |                          |       |        |  |      |              |       |       |                          |       |        |  |      |              |       |       |                          |       |        |  |      |              |       |       |                          |       |        |  |      |              |       |       |                          |       |        |  |      |              |       |       |                          |       |        |  |      |              |       |       |                          |       |        |  |      |              |      |      |                            |  |  |  |             |                     |               |           |                             |  |  |  |             |                     |           |               |
| 2021-12-09_to_2021-12-22    | -0.34                                                | 0.2318                                                                                                                                                                                                                                                                                                                                                                                                                                                                                                                                                                                                                                                                                                                                                                                                                                                                                                                                                                                                                                                                                                                                                                                                                                                                                                                                                                                                                                                                                                                                                                                                                                                                                                                                                                                                                                      |              | 0.71        | [0.45; 1.12]        | 17.0%           | 16.4%           |        |                 |                 |                          |       |        |  |      |              |      |      |                          |       |        |  |      |              |       |       |                          |       |        |  |      |              |       |       |                          |       |        |  |      |              |       |       |                          |       |        |  |      |              |       |       |                          |       |        |  |      |              |       |       |                          |       |        |  |      |              |       |       |                          |       |        |  |      |              |      |      |                            |  |  |  |             |                     |               |           |                             |  |  |  |             |                     |           |               |
| 2021-12-23_to_2022-01-05    | -0.98                                                | 0.7639                                                                                                                                                                                                                                                                                                                                                                                                                                                                                                                                                                                                                                                                                                                                                                                                                                                                                                                                                                                                                                                                                                                                                                                                                                                                                                                                                                                                                                                                                                                                                                                                                                                                                                                                                                                                                                      |              | 0.37        | [0.08; 1.67]        | 1.6%            | 2.3%            |        |                 |                 |                          |       |        |  |      |              |      |      |                          |       |        |  |      |              |       |       |                          |       |        |  |      |              |       |       |                          |       |        |  |      |              |       |       |                          |       |        |  |      |              |       |       |                          |       |        |  |      |              |       |       |                          |       |        |  |      |              |       |       |                          |       |        |  |      |              |      |      |                            |  |  |  |             |                     |               |           |                             |  |  |  |             |                     |           |               |
| <b>Common effect model</b>  |                                                      |                                                                                                                                                                                                                                                                                                                                                                                                                                                                                                                                                                                                                                                                                                                                                                                                                                                                                                                                                                                                                                                                                                                                                                                                                                                                                                                                                                                                                                                                                                                                                                                                                                                                                                                                                                                                                                             |              | <b>0.70</b> | <b>[0.58; 0.85]</b> | <b>100.0%</b>   | <b>--</b>       |        |                 |                 |                          |       |        |  |      |              |      |      |                          |       |        |  |      |              |       |       |                          |       |        |  |      |              |       |       |                          |       |        |  |      |              |       |       |                          |       |        |  |      |              |       |       |                          |       |        |  |      |              |       |       |                          |       |        |  |      |              |       |       |                          |       |        |  |      |              |      |      |                            |  |  |  |             |                     |               |           |                             |  |  |  |             |                     |           |               |
| <b>Random effects model</b> |                                                      |                                                                                                                                                                                                                                                                                                                                                                                                                                                                                                                                                                                                                                                                                                                                                                                                                                                                                                                                                                                                                                                                                                                                                                                                                                                                                                                                                                                                                                                                                                                                                                                                                                                                                                                                                                                                                                             |              | <b>0.71</b> | <b>[0.57; 0.90]</b> | <b>--</b>       | <b>100.0%</b>   |        |                 |                 |                          |       |        |  |      |              |      |      |                          |       |        |  |      |              |       |       |                          |       |        |  |      |              |       |       |                          |       |        |  |      |              |       |       |                          |       |        |  |      |              |       |       |                          |       |        |  |      |              |       |       |                          |       |        |  |      |              |       |       |                          |       |        |  |      |              |      |      |                            |  |  |  |             |                     |               |           |                             |  |  |  |             |                     |           |               |
|                             | <p>IMD Quintile 5 in reference to IMD Quintile 1</p> | <table border="1"> <thead> <tr> <th>Study</th> <th>TE</th> <th>seTE</th> <th>Hazard Ratio</th> <th>HR</th> <th>95%-CI</th> <th>Weight (common)</th> <th>Weight (random)</th> </tr> </thead> <tbody> <tr><td>2021-09-16_to_2021-09-29</td><td>-0.49</td><td>0.5628</td><td></td><td>0.61</td><td>[0.20; 1.85]</td><td>2.7%</td><td>2.7%</td></tr> <tr><td>2021-09-30_to_2021-10-13</td><td>-0.24</td><td>0.2743</td><td></td><td>0.78</td><td>[0.46; 1.34]</td><td>11.4%</td><td>11.4%</td></tr> <tr><td>2021-10-14_to_2021-10-27</td><td>-0.35</td><td>0.2380</td><td></td><td>0.70</td><td>[0.44; 1.12]</td><td>15.2%</td><td>15.2%</td></tr> <tr><td>2021-10-28_to_2021-11-10</td><td>-0.45</td><td>0.1900</td><td></td><td>0.64</td><td>[0.44; 0.93]</td><td>23.8%</td><td>23.8%</td></tr> <tr><td>2021-11-11_to_2021-11-24</td><td>-0.21</td><td>0.2384</td><td></td><td>0.81</td><td>[0.51; 1.30]</td><td>15.1%</td><td>15.1%</td></tr> <tr><td>2021-11-25_to_2021-12-08</td><td>-0.43</td><td>0.2537</td><td></td><td>0.65</td><td>[0.39; 1.06]</td><td>13.4%</td><td>13.4%</td></tr> <tr><td>2021-12-09_to_2021-12-22</td><td>-0.19</td><td>0.2274</td><td></td><td>0.83</td><td>[0.53; 1.30]</td><td>16.6%</td><td>16.6%</td></tr> <tr><td>2021-12-23_to_2022-01-05</td><td>-0.76</td><td>0.7072</td><td></td><td>0.47</td><td>[0.12; 1.87]</td><td>1.7%</td><td>1.7%</td></tr> <tr><td><b>Common effect model</b></td><td></td><td></td><td></td><td><b>0.72</b></td><td><b>[0.60; 0.86]</b></td><td><b>100.0%</b></td><td><b>--</b></td></tr> <tr><td><b>Random effects model</b></td><td></td><td></td><td></td><td><b>0.72</b></td><td><b>[0.60; 0.86]</b></td><td><b>--</b></td><td><b>100.0%</b></td></tr> </tbody> </table> <p>Heterogeneity: <math>I^2 = 0\%</math>, <math>\tau^2 = 0</math>, <math>p = 0.97</math></p>     | Study        | TE          | seTE                | Hazard Ratio    | HR              | 95%-CI | Weight (common) | Weight (random) | 2021-09-16_to_2021-09-29 | -0.49 | 0.5628 |  | 0.61 | [0.20; 1.85] | 2.7% | 2.7% | 2021-09-30_to_2021-10-13 | -0.24 | 0.2743 |  | 0.78 | [0.46; 1.34] | 11.4% | 11.4% | 2021-10-14_to_2021-10-27 | -0.35 | 0.2380 |  | 0.70 | [0.44; 1.12] | 15.2% | 15.2% | 2021-10-28_to_2021-11-10 | -0.45 | 0.1900 |  | 0.64 | [0.44; 0.93] | 23.8% | 23.8% | 2021-11-11_to_2021-11-24 | -0.21 | 0.2384 |  | 0.81 | [0.51; 1.30] | 15.1% | 15.1% | 2021-11-25_to_2021-12-08 | -0.43 | 0.2537 |  | 0.65 | [0.39; 1.06] | 13.4% | 13.4% | 2021-12-09_to_2021-12-22 | -0.19 | 0.2274 |  | 0.83 | [0.53; 1.30] | 16.6% | 16.6% | 2021-12-23_to_2022-01-05 | -0.76 | 0.7072 |  | 0.47 | [0.12; 1.87] | 1.7% | 1.7% | <b>Common effect model</b> |  |  |  | <b>0.72</b> | <b>[0.60; 0.86]</b> | <b>100.0%</b> | <b>--</b> | <b>Random effects model</b> |  |  |  | <b>0.72</b> | <b>[0.60; 0.86]</b> | <b>--</b> | <b>100.0%</b> |
| Study                       | TE                                                   | seTE                                                                                                                                                                                                                                                                                                                                                                                                                                                                                                                                                                                                                                                                                                                                                                                                                                                                                                                                                                                                                                                                                                                                                                                                                                                                                                                                                                                                                                                                                                                                                                                                                                                                                                                                                                                                                                        | Hazard Ratio | HR          | 95%-CI              | Weight (common) | Weight (random) |        |                 |                 |                          |       |        |  |      |              |      |      |                          |       |        |  |      |              |       |       |                          |       |        |  |      |              |       |       |                          |       |        |  |      |              |       |       |                          |       |        |  |      |              |       |       |                          |       |        |  |      |              |       |       |                          |       |        |  |      |              |       |       |                          |       |        |  |      |              |      |      |                            |  |  |  |             |                     |               |           |                             |  |  |  |             |                     |           |               |
| 2021-09-16_to_2021-09-29    | -0.49                                                | 0.5628                                                                                                                                                                                                                                                                                                                                                                                                                                                                                                                                                                                                                                                                                                                                                                                                                                                                                                                                                                                                                                                                                                                                                                                                                                                                                                                                                                                                                                                                                                                                                                                                                                                                                                                                                                                                                                      |              | 0.61        | [0.20; 1.85]        | 2.7%            | 2.7%            |        |                 |                 |                          |       |        |  |      |              |      |      |                          |       |        |  |      |              |       |       |                          |       |        |  |      |              |       |       |                          |       |        |  |      |              |       |       |                          |       |        |  |      |              |       |       |                          |       |        |  |      |              |       |       |                          |       |        |  |      |              |       |       |                          |       |        |  |      |              |      |      |                            |  |  |  |             |                     |               |           |                             |  |  |  |             |                     |           |               |
| 2021-09-30_to_2021-10-13    | -0.24                                                | 0.2743                                                                                                                                                                                                                                                                                                                                                                                                                                                                                                                                                                                                                                                                                                                                                                                                                                                                                                                                                                                                                                                                                                                                                                                                                                                                                                                                                                                                                                                                                                                                                                                                                                                                                                                                                                                                                                      |              | 0.78        | [0.46; 1.34]        | 11.4%           | 11.4%           |        |                 |                 |                          |       |        |  |      |              |      |      |                          |       |        |  |      |              |       |       |                          |       |        |  |      |              |       |       |                          |       |        |  |      |              |       |       |                          |       |        |  |      |              |       |       |                          |       |        |  |      |              |       |       |                          |       |        |  |      |              |       |       |                          |       |        |  |      |              |      |      |                            |  |  |  |             |                     |               |           |                             |  |  |  |             |                     |           |               |
| 2021-10-14_to_2021-10-27    | -0.35                                                | 0.2380                                                                                                                                                                                                                                                                                                                                                                                                                                                                                                                                                                                                                                                                                                                                                                                                                                                                                                                                                                                                                                                                                                                                                                                                                                                                                                                                                                                                                                                                                                                                                                                                                                                                                                                                                                                                                                      |              | 0.70        | [0.44; 1.12]        | 15.2%           | 15.2%           |        |                 |                 |                          |       |        |  |      |              |      |      |                          |       |        |  |      |              |       |       |                          |       |        |  |      |              |       |       |                          |       |        |  |      |              |       |       |                          |       |        |  |      |              |       |       |                          |       |        |  |      |              |       |       |                          |       |        |  |      |              |       |       |                          |       |        |  |      |              |      |      |                            |  |  |  |             |                     |               |           |                             |  |  |  |             |                     |           |               |
| 2021-10-28_to_2021-11-10    | -0.45                                                | 0.1900                                                                                                                                                                                                                                                                                                                                                                                                                                                                                                                                                                                                                                                                                                                                                                                                                                                                                                                                                                                                                                                                                                                                                                                                                                                                                                                                                                                                                                                                                                                                                                                                                                                                                                                                                                                                                                      |              | 0.64        | [0.44; 0.93]        | 23.8%           | 23.8%           |        |                 |                 |                          |       |        |  |      |              |      |      |                          |       |        |  |      |              |       |       |                          |       |        |  |      |              |       |       |                          |       |        |  |      |              |       |       |                          |       |        |  |      |              |       |       |                          |       |        |  |      |              |       |       |                          |       |        |  |      |              |       |       |                          |       |        |  |      |              |      |      |                            |  |  |  |             |                     |               |           |                             |  |  |  |             |                     |           |               |
| 2021-11-11_to_2021-11-24    | -0.21                                                | 0.2384                                                                                                                                                                                                                                                                                                                                                                                                                                                                                                                                                                                                                                                                                                                                                                                                                                                                                                                                                                                                                                                                                                                                                                                                                                                                                                                                                                                                                                                                                                                                                                                                                                                                                                                                                                                                                                      |              | 0.81        | [0.51; 1.30]        | 15.1%           | 15.1%           |        |                 |                 |                          |       |        |  |      |              |      |      |                          |       |        |  |      |              |       |       |                          |       |        |  |      |              |       |       |                          |       |        |  |      |              |       |       |                          |       |        |  |      |              |       |       |                          |       |        |  |      |              |       |       |                          |       |        |  |      |              |       |       |                          |       |        |  |      |              |      |      |                            |  |  |  |             |                     |               |           |                             |  |  |  |             |                     |           |               |
| 2021-11-25_to_2021-12-08    | -0.43                                                | 0.2537                                                                                                                                                                                                                                                                                                                                                                                                                                                                                                                                                                                                                                                                                                                                                                                                                                                                                                                                                                                                                                                                                                                                                                                                                                                                                                                                                                                                                                                                                                                                                                                                                                                                                                                                                                                                                                      |              | 0.65        | [0.39; 1.06]        | 13.4%           | 13.4%           |        |                 |                 |                          |       |        |  |      |              |      |      |                          |       |        |  |      |              |       |       |                          |       |        |  |      |              |       |       |                          |       |        |  |      |              |       |       |                          |       |        |  |      |              |       |       |                          |       |        |  |      |              |       |       |                          |       |        |  |      |              |       |       |                          |       |        |  |      |              |      |      |                            |  |  |  |             |                     |               |           |                             |  |  |  |             |                     |           |               |
| 2021-12-09_to_2021-12-22    | -0.19                                                | 0.2274                                                                                                                                                                                                                                                                                                                                                                                                                                                                                                                                                                                                                                                                                                                                                                                                                                                                                                                                                                                                                                                                                                                                                                                                                                                                                                                                                                                                                                                                                                                                                                                                                                                                                                                                                                                                                                      |              | 0.83        | [0.53; 1.30]        | 16.6%           | 16.6%           |        |                 |                 |                          |       |        |  |      |              |      |      |                          |       |        |  |      |              |       |       |                          |       |        |  |      |              |       |       |                          |       |        |  |      |              |       |       |                          |       |        |  |      |              |       |       |                          |       |        |  |      |              |       |       |                          |       |        |  |      |              |       |       |                          |       |        |  |      |              |      |      |                            |  |  |  |             |                     |               |           |                             |  |  |  |             |                     |           |               |
| 2021-12-23_to_2022-01-05    | -0.76                                                | 0.7072                                                                                                                                                                                                                                                                                                                                                                                                                                                                                                                                                                                                                                                                                                                                                                                                                                                                                                                                                                                                                                                                                                                                                                                                                                                                                                                                                                                                                                                                                                                                                                                                                                                                                                                                                                                                                                      |              | 0.47        | [0.12; 1.87]        | 1.7%            | 1.7%            |        |                 |                 |                          |       |        |  |      |              |      |      |                          |       |        |  |      |              |       |       |                          |       |        |  |      |              |       |       |                          |       |        |  |      |              |       |       |                          |       |        |  |      |              |       |       |                          |       |        |  |      |              |       |       |                          |       |        |  |      |              |       |       |                          |       |        |  |      |              |      |      |                            |  |  |  |             |                     |               |           |                             |  |  |  |             |                     |           |               |
| <b>Common effect model</b>  |                                                      |                                                                                                                                                                                                                                                                                                                                                                                                                                                                                                                                                                                                                                                                                                                                                                                                                                                                                                                                                                                                                                                                                                                                                                                                                                                                                                                                                                                                                                                                                                                                                                                                                                                                                                                                                                                                                                             |              | <b>0.72</b> | <b>[0.60; 0.86]</b> | <b>100.0%</b>   | <b>--</b>       |        |                 |                 |                          |       |        |  |      |              |      |      |                          |       |        |  |      |              |       |       |                          |       |        |  |      |              |       |       |                          |       |        |  |      |              |       |       |                          |       |        |  |      |              |       |       |                          |       |        |  |      |              |       |       |                          |       |        |  |      |              |       |       |                          |       |        |  |      |              |      |      |                            |  |  |  |             |                     |               |           |                             |  |  |  |             |                     |           |               |
| <b>Random effects model</b> |                                                      |                                                                                                                                                                                                                                                                                                                                                                                                                                                                                                                                                                                                                                                                                                                                                                                                                                                                                                                                                                                                                                                                                                                                                                                                                                                                                                                                                                                                                                                                                                                                                                                                                                                                                                                                                                                                                                             |              | <b>0.72</b> | <b>[0.60; 0.86]</b> | <b>--</b>       | <b>100.0%</b>   |        |                 |                 |                          |       |        |  |      |              |      |      |                          |       |        |  |      |              |       |       |                          |       |        |  |      |              |       |       |                          |       |        |  |      |              |       |       |                          |       |        |  |      |              |       |       |                          |       |        |  |      |              |       |       |                          |       |        |  |      |              |       |       |                          |       |        |  |      |              |      |      |                            |  |  |  |             |                     |               |           |                             |  |  |  |             |                     |           |               |

|                             | <p>Ethnic Group</p> <p>(Minority Ethnic in reference to White British)</p>                | <table border="1"> <thead> <tr> <th>Study</th> <th>TE</th> <th>seTE</th> <th>Hazard Ratio</th> <th>HR</th> <th>95%-CI</th> <th>Weight (common)</th> <th>Weight (random)</th> </tr> </thead> <tbody> <tr><td>2021-09-16_to_2021-09-29</td><td>0.01</td><td>0.3750</td><td></td><td>1.01</td><td>[0.48; 2.10]</td><td>4.1%</td><td>4.1%</td></tr> <tr><td>2021-09-30_to_2021-10-13</td><td>0.02</td><td>0.2471</td><td></td><td>1.02</td><td>[0.63; 1.65]</td><td>9.4%</td><td>9.4%</td></tr> <tr><td>2021-10-14_to_2021-10-27</td><td>0.39</td><td>0.2040</td><td></td><td>1.48</td><td>[0.99; 2.21]</td><td>13.8%</td><td>13.8%</td></tr> <tr><td>2021-10-28_to_2021-11-10</td><td>0.43</td><td>0.1837</td><td></td><td>1.54</td><td>[1.08; 2.21]</td><td>17.1%</td><td>17.1%</td></tr> <tr><td>2021-11-11_to_2021-11-24</td><td>0.49</td><td>0.1823</td><td></td><td>1.64</td><td>[1.15; 2.34]</td><td>17.3%</td><td>17.3%</td></tr> <tr><td>2021-11-25_to_2021-12-08</td><td>0.51</td><td>0.1948</td><td></td><td>1.66</td><td>[1.14; 2.44]</td><td>15.2%</td><td>15.2%</td></tr> <tr><td>2021-12-09_to_2021-12-22</td><td>0.45</td><td>0.1612</td><td></td><td>1.56</td><td>[1.14; 2.14]</td><td>22.1%</td><td>22.1%</td></tr> <tr><td>2021-12-23_to_2022-01-05</td><td>-0.60</td><td>0.7528</td><td></td><td>0.55</td><td>[0.13; 2.40]</td><td>1.0%</td><td>1.0%</td></tr> <tr><td><b>Common effect model</b></td><td></td><td></td><td></td><td><b>1.47</b></td><td><b>[1.27; 1.71]</b></td><td><b>100.0%</b></td><td><b>--</b></td></tr> <tr><td><b>Random effects model</b></td><td></td><td></td><td></td><td><b>1.47</b></td><td><b>[1.27; 1.71]</b></td><td><b>--</b></td><td><b>100.0%</b></td></tr> </tbody> </table> <p>Heterogeneity: <math>I^2 = 0\%</math>, <math>\tau^2 = 0.0001</math>, <math>p = 0.55</math></p>        | Study        | TE          | seTE                | Hazard Ratio    | HR              | 95%-CI | Weight (common) | Weight (random) | 2021-09-16_to_2021-09-29 | 0.01  | 0.3750 |  | 1.01 | [0.48; 2.10] | 4.1% | 4.1% | 2021-09-30_to_2021-10-13 | 0.02  | 0.2471 |  | 1.02 | [0.63; 1.65] | 9.4%  | 9.4%  | 2021-10-14_to_2021-10-27 | 0.39  | 0.2040 |  | 1.48 | [0.99; 2.21] | 13.8% | 13.8% | 2021-10-28_to_2021-11-10 | 0.43  | 0.1837 |  | 1.54 | [1.08; 2.21] | 17.1% | 17.1% | 2021-11-11_to_2021-11-24 | 0.49  | 0.1823 |  | 1.64 | [1.15; 2.34] | 17.3% | 17.3% | 2021-11-25_to_2021-12-08 | 0.51  | 0.1948 |  | 1.66 | [1.14; 2.44] | 15.2% | 15.2% | 2021-12-09_to_2021-12-22 | 0.45  | 0.1612 |  | 1.56 | [1.14; 2.14] | 22.1% | 22.1% | 2021-12-23_to_2022-01-05 | -0.60 | 0.7528 |  | 0.55 | [0.13; 2.40] | 1.0% | 1.0% | <b>Common effect model</b> |  |  |  | <b>1.47</b> | <b>[1.27; 1.71]</b> | <b>100.0%</b> | <b>--</b> | <b>Random effects model</b> |  |  |  | <b>1.47</b> | <b>[1.27; 1.71]</b> | <b>--</b> | <b>100.0%</b> |
|-----------------------------|-------------------------------------------------------------------------------------------|--------------------------------------------------------------------------------------------------------------------------------------------------------------------------------------------------------------------------------------------------------------------------------------------------------------------------------------------------------------------------------------------------------------------------------------------------------------------------------------------------------------------------------------------------------------------------------------------------------------------------------------------------------------------------------------------------------------------------------------------------------------------------------------------------------------------------------------------------------------------------------------------------------------------------------------------------------------------------------------------------------------------------------------------------------------------------------------------------------------------------------------------------------------------------------------------------------------------------------------------------------------------------------------------------------------------------------------------------------------------------------------------------------------------------------------------------------------------------------------------------------------------------------------------------------------------------------------------------------------------------------------------------------------------------------------------------------------------------------------------------------------------------------------------------------------------------------------------|--------------|-------------|---------------------|-----------------|-----------------|--------|-----------------|-----------------|--------------------------|-------|--------|--|------|--------------|------|------|--------------------------|-------|--------|--|------|--------------|-------|-------|--------------------------|-------|--------|--|------|--------------|-------|-------|--------------------------|-------|--------|--|------|--------------|-------|-------|--------------------------|-------|--------|--|------|--------------|-------|-------|--------------------------|-------|--------|--|------|--------------|-------|-------|--------------------------|-------|--------|--|------|--------------|-------|-------|--------------------------|-------|--------|--|------|--------------|------|------|----------------------------|--|--|--|-------------|---------------------|---------------|-----------|-----------------------------|--|--|--|-------------|---------------------|-----------|---------------|
| Study                       | TE                                                                                        | seTE                                                                                                                                                                                                                                                                                                                                                                                                                                                                                                                                                                                                                                                                                                                                                                                                                                                                                                                                                                                                                                                                                                                                                                                                                                                                                                                                                                                                                                                                                                                                                                                                                                                                                                                                                                                                                                       | Hazard Ratio | HR          | 95%-CI              | Weight (common) | Weight (random) |        |                 |                 |                          |       |        |  |      |              |      |      |                          |       |        |  |      |              |       |       |                          |       |        |  |      |              |       |       |                          |       |        |  |      |              |       |       |                          |       |        |  |      |              |       |       |                          |       |        |  |      |              |       |       |                          |       |        |  |      |              |       |       |                          |       |        |  |      |              |      |      |                            |  |  |  |             |                     |               |           |                             |  |  |  |             |                     |           |               |
| 2021-09-16_to_2021-09-29    | 0.01                                                                                      | 0.3750                                                                                                                                                                                                                                                                                                                                                                                                                                                                                                                                                                                                                                                                                                                                                                                                                                                                                                                                                                                                                                                                                                                                                                                                                                                                                                                                                                                                                                                                                                                                                                                                                                                                                                                                                                                                                                     |              | 1.01        | [0.48; 2.10]        | 4.1%            | 4.1%            |        |                 |                 |                          |       |        |  |      |              |      |      |                          |       |        |  |      |              |       |       |                          |       |        |  |      |              |       |       |                          |       |        |  |      |              |       |       |                          |       |        |  |      |              |       |       |                          |       |        |  |      |              |       |       |                          |       |        |  |      |              |       |       |                          |       |        |  |      |              |      |      |                            |  |  |  |             |                     |               |           |                             |  |  |  |             |                     |           |               |
| 2021-09-30_to_2021-10-13    | 0.02                                                                                      | 0.2471                                                                                                                                                                                                                                                                                                                                                                                                                                                                                                                                                                                                                                                                                                                                                                                                                                                                                                                                                                                                                                                                                                                                                                                                                                                                                                                                                                                                                                                                                                                                                                                                                                                                                                                                                                                                                                     |              | 1.02        | [0.63; 1.65]        | 9.4%            | 9.4%            |        |                 |                 |                          |       |        |  |      |              |      |      |                          |       |        |  |      |              |       |       |                          |       |        |  |      |              |       |       |                          |       |        |  |      |              |       |       |                          |       |        |  |      |              |       |       |                          |       |        |  |      |              |       |       |                          |       |        |  |      |              |       |       |                          |       |        |  |      |              |      |      |                            |  |  |  |             |                     |               |           |                             |  |  |  |             |                     |           |               |
| 2021-10-14_to_2021-10-27    | 0.39                                                                                      | 0.2040                                                                                                                                                                                                                                                                                                                                                                                                                                                                                                                                                                                                                                                                                                                                                                                                                                                                                                                                                                                                                                                                                                                                                                                                                                                                                                                                                                                                                                                                                                                                                                                                                                                                                                                                                                                                                                     |              | 1.48        | [0.99; 2.21]        | 13.8%           | 13.8%           |        |                 |                 |                          |       |        |  |      |              |      |      |                          |       |        |  |      |              |       |       |                          |       |        |  |      |              |       |       |                          |       |        |  |      |              |       |       |                          |       |        |  |      |              |       |       |                          |       |        |  |      |              |       |       |                          |       |        |  |      |              |       |       |                          |       |        |  |      |              |      |      |                            |  |  |  |             |                     |               |           |                             |  |  |  |             |                     |           |               |
| 2021-10-28_to_2021-11-10    | 0.43                                                                                      | 0.1837                                                                                                                                                                                                                                                                                                                                                                                                                                                                                                                                                                                                                                                                                                                                                                                                                                                                                                                                                                                                                                                                                                                                                                                                                                                                                                                                                                                                                                                                                                                                                                                                                                                                                                                                                                                                                                     |              | 1.54        | [1.08; 2.21]        | 17.1%           | 17.1%           |        |                 |                 |                          |       |        |  |      |              |      |      |                          |       |        |  |      |              |       |       |                          |       |        |  |      |              |       |       |                          |       |        |  |      |              |       |       |                          |       |        |  |      |              |       |       |                          |       |        |  |      |              |       |       |                          |       |        |  |      |              |       |       |                          |       |        |  |      |              |      |      |                            |  |  |  |             |                     |               |           |                             |  |  |  |             |                     |           |               |
| 2021-11-11_to_2021-11-24    | 0.49                                                                                      | 0.1823                                                                                                                                                                                                                                                                                                                                                                                                                                                                                                                                                                                                                                                                                                                                                                                                                                                                                                                                                                                                                                                                                                                                                                                                                                                                                                                                                                                                                                                                                                                                                                                                                                                                                                                                                                                                                                     |              | 1.64        | [1.15; 2.34]        | 17.3%           | 17.3%           |        |                 |                 |                          |       |        |  |      |              |      |      |                          |       |        |  |      |              |       |       |                          |       |        |  |      |              |       |       |                          |       |        |  |      |              |       |       |                          |       |        |  |      |              |       |       |                          |       |        |  |      |              |       |       |                          |       |        |  |      |              |       |       |                          |       |        |  |      |              |      |      |                            |  |  |  |             |                     |               |           |                             |  |  |  |             |                     |           |               |
| 2021-11-25_to_2021-12-08    | 0.51                                                                                      | 0.1948                                                                                                                                                                                                                                                                                                                                                                                                                                                                                                                                                                                                                                                                                                                                                                                                                                                                                                                                                                                                                                                                                                                                                                                                                                                                                                                                                                                                                                                                                                                                                                                                                                                                                                                                                                                                                                     |              | 1.66        | [1.14; 2.44]        | 15.2%           | 15.2%           |        |                 |                 |                          |       |        |  |      |              |      |      |                          |       |        |  |      |              |       |       |                          |       |        |  |      |              |       |       |                          |       |        |  |      |              |       |       |                          |       |        |  |      |              |       |       |                          |       |        |  |      |              |       |       |                          |       |        |  |      |              |       |       |                          |       |        |  |      |              |      |      |                            |  |  |  |             |                     |               |           |                             |  |  |  |             |                     |           |               |
| 2021-12-09_to_2021-12-22    | 0.45                                                                                      | 0.1612                                                                                                                                                                                                                                                                                                                                                                                                                                                                                                                                                                                                                                                                                                                                                                                                                                                                                                                                                                                                                                                                                                                                                                                                                                                                                                                                                                                                                                                                                                                                                                                                                                                                                                                                                                                                                                     |              | 1.56        | [1.14; 2.14]        | 22.1%           | 22.1%           |        |                 |                 |                          |       |        |  |      |              |      |      |                          |       |        |  |      |              |       |       |                          |       |        |  |      |              |       |       |                          |       |        |  |      |              |       |       |                          |       |        |  |      |              |       |       |                          |       |        |  |      |              |       |       |                          |       |        |  |      |              |       |       |                          |       |        |  |      |              |      |      |                            |  |  |  |             |                     |               |           |                             |  |  |  |             |                     |           |               |
| 2021-12-23_to_2022-01-05    | -0.60                                                                                     | 0.7528                                                                                                                                                                                                                                                                                                                                                                                                                                                                                                                                                                                                                                                                                                                                                                                                                                                                                                                                                                                                                                                                                                                                                                                                                                                                                                                                                                                                                                                                                                                                                                                                                                                                                                                                                                                                                                     |              | 0.55        | [0.13; 2.40]        | 1.0%            | 1.0%            |        |                 |                 |                          |       |        |  |      |              |      |      |                          |       |        |  |      |              |       |       |                          |       |        |  |      |              |       |       |                          |       |        |  |      |              |       |       |                          |       |        |  |      |              |       |       |                          |       |        |  |      |              |       |       |                          |       |        |  |      |              |       |       |                          |       |        |  |      |              |      |      |                            |  |  |  |             |                     |               |           |                             |  |  |  |             |                     |           |               |
| <b>Common effect model</b>  |                                                                                           |                                                                                                                                                                                                                                                                                                                                                                                                                                                                                                                                                                                                                                                                                                                                                                                                                                                                                                                                                                                                                                                                                                                                                                                                                                                                                                                                                                                                                                                                                                                                                                                                                                                                                                                                                                                                                                            |              | <b>1.47</b> | <b>[1.27; 1.71]</b> | <b>100.0%</b>   | <b>--</b>       |        |                 |                 |                          |       |        |  |      |              |      |      |                          |       |        |  |      |              |       |       |                          |       |        |  |      |              |       |       |                          |       |        |  |      |              |       |       |                          |       |        |  |      |              |       |       |                          |       |        |  |      |              |       |       |                          |       |        |  |      |              |       |       |                          |       |        |  |      |              |      |      |                            |  |  |  |             |                     |               |           |                             |  |  |  |             |                     |           |               |
| <b>Random effects model</b> |                                                                                           |                                                                                                                                                                                                                                                                                                                                                                                                                                                                                                                                                                                                                                                                                                                                                                                                                                                                                                                                                                                                                                                                                                                                                                                                                                                                                                                                                                                                                                                                                                                                                                                                                                                                                                                                                                                                                                            |              | <b>1.47</b> | <b>[1.27; 1.71]</b> | <b>--</b>       | <b>100.0%</b>   |        |                 |                 |                          |       |        |  |      |              |      |      |                          |       |        |  |      |              |       |       |                          |       |        |  |      |              |       |       |                          |       |        |  |      |              |       |       |                          |       |        |  |      |              |       |       |                          |       |        |  |      |              |       |       |                          |       |        |  |      |              |       |       |                          |       |        |  |      |              |      |      |                            |  |  |  |             |                     |               |           |                             |  |  |  |             |                     |           |               |
|                             | <p>Sex (Female in reference to male)</p>                                                  | <table border="1"> <thead> <tr> <th>Study</th> <th>TE</th> <th>seTE</th> <th>Hazard Ratio</th> <th>HR</th> <th>95%-CI</th> <th>Weight (common)</th> <th>Weight (random)</th> </tr> </thead> <tbody> <tr><td>2021-09-16_to_2021-09-29</td><td>0.61</td><td>0.2631</td><td></td><td>1.84</td><td>[1.10; 3.08]</td><td>3.7%</td><td>4.1%</td></tr> <tr><td>2021-09-30_to_2021-10-13</td><td>0.05</td><td>0.1443</td><td></td><td>1.05</td><td>[0.79; 1.40]</td><td>12.4%</td><td>12.7%</td></tr> <tr><td>2021-10-14_to_2021-10-27</td><td>-0.26</td><td>0.1278</td><td></td><td>0.77</td><td>[0.60; 0.99]</td><td>15.8%</td><td>15.8%</td></tr> <tr><td>2021-10-28_to_2021-11-10</td><td>-0.12</td><td>0.1113</td><td></td><td>0.88</td><td>[0.71; 1.10]</td><td>20.9%</td><td>20.1%</td></tr> <tr><td>2021-11-11_to_2021-11-24</td><td>-0.11</td><td>0.1163</td><td></td><td>0.89</td><td>[0.71; 1.12]</td><td>19.1%</td><td>18.7%</td></tr> <tr><td>2021-11-25_to_2021-12-08</td><td>0.00</td><td>0.1402</td><td></td><td>1.00</td><td>[0.76; 1.32]</td><td>13.1%</td><td>13.4%</td></tr> <tr><td>2021-12-09_to_2021-12-22</td><td>0.02</td><td>0.1368</td><td></td><td>1.02</td><td>[0.78; 1.34]</td><td>13.8%</td><td>14.0%</td></tr> <tr><td>2021-12-23_to_2022-01-05</td><td>-0.21</td><td>0.4869</td><td></td><td>0.81</td><td>[0.31; 2.10]</td><td>1.1%</td><td>1.2%</td></tr> <tr><td><b>Common effect model</b></td><td></td><td></td><td></td><td><b>0.94</b></td><td><b>[0.85; 1.04]</b></td><td><b>100.0%</b></td><td><b>--</b></td></tr> <tr><td><b>Random effects model</b></td><td></td><td></td><td></td><td><b>0.95</b></td><td><b>[0.85; 1.05]</b></td><td><b>--</b></td><td><b>100.0%</b></td></tr> </tbody> </table> <p>Heterogeneity: <math>I^2 = 34\%</math>, <math>\tau^2 = 0.0021</math>, <math>p = 0.15</math></p>  | Study        | TE          | seTE                | Hazard Ratio    | HR              | 95%-CI | Weight (common) | Weight (random) | 2021-09-16_to_2021-09-29 | 0.61  | 0.2631 |  | 1.84 | [1.10; 3.08] | 3.7% | 4.1% | 2021-09-30_to_2021-10-13 | 0.05  | 0.1443 |  | 1.05 | [0.79; 1.40] | 12.4% | 12.7% | 2021-10-14_to_2021-10-27 | -0.26 | 0.1278 |  | 0.77 | [0.60; 0.99] | 15.8% | 15.8% | 2021-10-28_to_2021-11-10 | -0.12 | 0.1113 |  | 0.88 | [0.71; 1.10] | 20.9% | 20.1% | 2021-11-11_to_2021-11-24 | -0.11 | 0.1163 |  | 0.89 | [0.71; 1.12] | 19.1% | 18.7% | 2021-11-25_to_2021-12-08 | 0.00  | 0.1402 |  | 1.00 | [0.76; 1.32] | 13.1% | 13.4% | 2021-12-09_to_2021-12-22 | 0.02  | 0.1368 |  | 1.02 | [0.78; 1.34] | 13.8% | 14.0% | 2021-12-23_to_2022-01-05 | -0.21 | 0.4869 |  | 0.81 | [0.31; 2.10] | 1.1% | 1.2% | <b>Common effect model</b> |  |  |  | <b>0.94</b> | <b>[0.85; 1.04]</b> | <b>100.0%</b> | <b>--</b> | <b>Random effects model</b> |  |  |  | <b>0.95</b> | <b>[0.85; 1.05]</b> | <b>--</b> | <b>100.0%</b> |
| Study                       | TE                                                                                        | seTE                                                                                                                                                                                                                                                                                                                                                                                                                                                                                                                                                                                                                                                                                                                                                                                                                                                                                                                                                                                                                                                                                                                                                                                                                                                                                                                                                                                                                                                                                                                                                                                                                                                                                                                                                                                                                                       | Hazard Ratio | HR          | 95%-CI              | Weight (common) | Weight (random) |        |                 |                 |                          |       |        |  |      |              |      |      |                          |       |        |  |      |              |       |       |                          |       |        |  |      |              |       |       |                          |       |        |  |      |              |       |       |                          |       |        |  |      |              |       |       |                          |       |        |  |      |              |       |       |                          |       |        |  |      |              |       |       |                          |       |        |  |      |              |      |      |                            |  |  |  |             |                     |               |           |                             |  |  |  |             |                     |           |               |
| 2021-09-16_to_2021-09-29    | 0.61                                                                                      | 0.2631                                                                                                                                                                                                                                                                                                                                                                                                                                                                                                                                                                                                                                                                                                                                                                                                                                                                                                                                                                                                                                                                                                                                                                                                                                                                                                                                                                                                                                                                                                                                                                                                                                                                                                                                                                                                                                     |              | 1.84        | [1.10; 3.08]        | 3.7%            | 4.1%            |        |                 |                 |                          |       |        |  |      |              |      |      |                          |       |        |  |      |              |       |       |                          |       |        |  |      |              |       |       |                          |       |        |  |      |              |       |       |                          |       |        |  |      |              |       |       |                          |       |        |  |      |              |       |       |                          |       |        |  |      |              |       |       |                          |       |        |  |      |              |      |      |                            |  |  |  |             |                     |               |           |                             |  |  |  |             |                     |           |               |
| 2021-09-30_to_2021-10-13    | 0.05                                                                                      | 0.1443                                                                                                                                                                                                                                                                                                                                                                                                                                                                                                                                                                                                                                                                                                                                                                                                                                                                                                                                                                                                                                                                                                                                                                                                                                                                                                                                                                                                                                                                                                                                                                                                                                                                                                                                                                                                                                     |              | 1.05        | [0.79; 1.40]        | 12.4%           | 12.7%           |        |                 |                 |                          |       |        |  |      |              |      |      |                          |       |        |  |      |              |       |       |                          |       |        |  |      |              |       |       |                          |       |        |  |      |              |       |       |                          |       |        |  |      |              |       |       |                          |       |        |  |      |              |       |       |                          |       |        |  |      |              |       |       |                          |       |        |  |      |              |      |      |                            |  |  |  |             |                     |               |           |                             |  |  |  |             |                     |           |               |
| 2021-10-14_to_2021-10-27    | -0.26                                                                                     | 0.1278                                                                                                                                                                                                                                                                                                                                                                                                                                                                                                                                                                                                                                                                                                                                                                                                                                                                                                                                                                                                                                                                                                                                                                                                                                                                                                                                                                                                                                                                                                                                                                                                                                                                                                                                                                                                                                     |              | 0.77        | [0.60; 0.99]        | 15.8%           | 15.8%           |        |                 |                 |                          |       |        |  |      |              |      |      |                          |       |        |  |      |              |       |       |                          |       |        |  |      |              |       |       |                          |       |        |  |      |              |       |       |                          |       |        |  |      |              |       |       |                          |       |        |  |      |              |       |       |                          |       |        |  |      |              |       |       |                          |       |        |  |      |              |      |      |                            |  |  |  |             |                     |               |           |                             |  |  |  |             |                     |           |               |
| 2021-10-28_to_2021-11-10    | -0.12                                                                                     | 0.1113                                                                                                                                                                                                                                                                                                                                                                                                                                                                                                                                                                                                                                                                                                                                                                                                                                                                                                                                                                                                                                                                                                                                                                                                                                                                                                                                                                                                                                                                                                                                                                                                                                                                                                                                                                                                                                     |              | 0.88        | [0.71; 1.10]        | 20.9%           | 20.1%           |        |                 |                 |                          |       |        |  |      |              |      |      |                          |       |        |  |      |              |       |       |                          |       |        |  |      |              |       |       |                          |       |        |  |      |              |       |       |                          |       |        |  |      |              |       |       |                          |       |        |  |      |              |       |       |                          |       |        |  |      |              |       |       |                          |       |        |  |      |              |      |      |                            |  |  |  |             |                     |               |           |                             |  |  |  |             |                     |           |               |
| 2021-11-11_to_2021-11-24    | -0.11                                                                                     | 0.1163                                                                                                                                                                                                                                                                                                                                                                                                                                                                                                                                                                                                                                                                                                                                                                                                                                                                                                                                                                                                                                                                                                                                                                                                                                                                                                                                                                                                                                                                                                                                                                                                                                                                                                                                                                                                                                     |              | 0.89        | [0.71; 1.12]        | 19.1%           | 18.7%           |        |                 |                 |                          |       |        |  |      |              |      |      |                          |       |        |  |      |              |       |       |                          |       |        |  |      |              |       |       |                          |       |        |  |      |              |       |       |                          |       |        |  |      |              |       |       |                          |       |        |  |      |              |       |       |                          |       |        |  |      |              |       |       |                          |       |        |  |      |              |      |      |                            |  |  |  |             |                     |               |           |                             |  |  |  |             |                     |           |               |
| 2021-11-25_to_2021-12-08    | 0.00                                                                                      | 0.1402                                                                                                                                                                                                                                                                                                                                                                                                                                                                                                                                                                                                                                                                                                                                                                                                                                                                                                                                                                                                                                                                                                                                                                                                                                                                                                                                                                                                                                                                                                                                                                                                                                                                                                                                                                                                                                     |              | 1.00        | [0.76; 1.32]        | 13.1%           | 13.4%           |        |                 |                 |                          |       |        |  |      |              |      |      |                          |       |        |  |      |              |       |       |                          |       |        |  |      |              |       |       |                          |       |        |  |      |              |       |       |                          |       |        |  |      |              |       |       |                          |       |        |  |      |              |       |       |                          |       |        |  |      |              |       |       |                          |       |        |  |      |              |      |      |                            |  |  |  |             |                     |               |           |                             |  |  |  |             |                     |           |               |
| 2021-12-09_to_2021-12-22    | 0.02                                                                                      | 0.1368                                                                                                                                                                                                                                                                                                                                                                                                                                                                                                                                                                                                                                                                                                                                                                                                                                                                                                                                                                                                                                                                                                                                                                                                                                                                                                                                                                                                                                                                                                                                                                                                                                                                                                                                                                                                                                     |              | 1.02        | [0.78; 1.34]        | 13.8%           | 14.0%           |        |                 |                 |                          |       |        |  |      |              |      |      |                          |       |        |  |      |              |       |       |                          |       |        |  |      |              |       |       |                          |       |        |  |      |              |       |       |                          |       |        |  |      |              |       |       |                          |       |        |  |      |              |       |       |                          |       |        |  |      |              |       |       |                          |       |        |  |      |              |      |      |                            |  |  |  |             |                     |               |           |                             |  |  |  |             |                     |           |               |
| 2021-12-23_to_2022-01-05    | -0.21                                                                                     | 0.4869                                                                                                                                                                                                                                                                                                                                                                                                                                                                                                                                                                                                                                                                                                                                                                                                                                                                                                                                                                                                                                                                                                                                                                                                                                                                                                                                                                                                                                                                                                                                                                                                                                                                                                                                                                                                                                     |              | 0.81        | [0.31; 2.10]        | 1.1%            | 1.2%            |        |                 |                 |                          |       |        |  |      |              |      |      |                          |       |        |  |      |              |       |       |                          |       |        |  |      |              |       |       |                          |       |        |  |      |              |       |       |                          |       |        |  |      |              |       |       |                          |       |        |  |      |              |       |       |                          |       |        |  |      |              |       |       |                          |       |        |  |      |              |      |      |                            |  |  |  |             |                     |               |           |                             |  |  |  |             |                     |           |               |
| <b>Common effect model</b>  |                                                                                           |                                                                                                                                                                                                                                                                                                                                                                                                                                                                                                                                                                                                                                                                                                                                                                                                                                                                                                                                                                                                                                                                                                                                                                                                                                                                                                                                                                                                                                                                                                                                                                                                                                                                                                                                                                                                                                            |              | <b>0.94</b> | <b>[0.85; 1.04]</b> | <b>100.0%</b>   | <b>--</b>       |        |                 |                 |                          |       |        |  |      |              |      |      |                          |       |        |  |      |              |       |       |                          |       |        |  |      |              |       |       |                          |       |        |  |      |              |       |       |                          |       |        |  |      |              |       |       |                          |       |        |  |      |              |       |       |                          |       |        |  |      |              |       |       |                          |       |        |  |      |              |      |      |                            |  |  |  |             |                     |               |           |                             |  |  |  |             |                     |           |               |
| <b>Random effects model</b> |                                                                                           |                                                                                                                                                                                                                                                                                                                                                                                                                                                                                                                                                                                                                                                                                                                                                                                                                                                                                                                                                                                                                                                                                                                                                                                                                                                                                                                                                                                                                                                                                                                                                                                                                                                                                                                                                                                                                                            |              | <b>0.95</b> | <b>[0.85; 1.05]</b> | <b>--</b>       | <b>100.0%</b>   |        |                 |                 |                          |       |        |  |      |              |      |      |                          |       |        |  |      |              |       |       |                          |       |        |  |      |              |       |       |                          |       |        |  |      |              |       |       |                          |       |        |  |      |              |       |       |                          |       |        |  |      |              |       |       |                          |       |        |  |      |              |       |       |                          |       |        |  |      |              |      |      |                            |  |  |  |             |                     |               |           |                             |  |  |  |             |                     |           |               |
|                             | <p>Prior SARs-CoV-2 infection</p>                                                         | <table border="1"> <thead> <tr> <th>Study</th> <th>TE</th> <th>seTE</th> <th>Hazard Ratio</th> <th>HR</th> <th>95%-CI</th> <th>Weight (common)</th> <th>Weight (random)</th> </tr> </thead> <tbody> <tr><td>2021-09-16_to_2021-09-29</td><td>-0.05</td><td>0.4266</td><td></td><td>0.95</td><td>[0.41; 2.20]</td><td>4.1%</td><td>4.5%</td></tr> <tr><td>2021-09-30_to_2021-10-13</td><td>-0.40</td><td>0.2968</td><td></td><td>0.67</td><td>[0.38; 1.17]</td><td>9.1%</td><td>9.6%</td></tr> <tr><td>2021-10-14_to_2021-10-27</td><td>0.04</td><td>0.2191</td><td></td><td>1.04</td><td>[0.68; 1.60]</td><td>15.6%</td><td>15.6%</td></tr> <tr><td>2021-10-28_to_2021-11-10</td><td>-0.24</td><td>0.2208</td><td></td><td>0.79</td><td>[0.51; 1.22]</td><td>15.3%</td><td>15.4%</td></tr> <tr><td>2021-11-11_to_2021-11-24</td><td>-0.23</td><td>0.1955</td><td></td><td>0.79</td><td>[0.54; 1.16]</td><td>19.5%</td><td>19.0%</td></tr> <tr><td>2021-11-25_to_2021-12-08</td><td>-0.50</td><td>0.2133</td><td></td><td>0.61</td><td>[0.40; 0.92]</td><td>16.4%</td><td>16.3%</td></tr> <tr><td>2021-12-09_to_2021-12-22</td><td>-0.58</td><td>0.1967</td><td></td><td>0.56</td><td>[0.38; 0.82]</td><td>19.3%</td><td>18.8%</td></tr> <tr><td>2021-12-23_to_2022-01-05</td><td>-2.00</td><td>1.0311</td><td></td><td>0.13</td><td>[0.02; 1.02]</td><td>0.7%</td><td>0.8%</td></tr> <tr><td><b>Common effect model</b></td><td></td><td></td><td></td><td><b>0.72</b></td><td><b>[0.61; 0.86]</b></td><td><b>100.0%</b></td><td><b>--</b></td></tr> <tr><td><b>Random effects model</b></td><td></td><td></td><td></td><td><b>0.72</b></td><td><b>[0.60; 0.87]</b></td><td><b>--</b></td><td><b>100.0%</b></td></tr> </tbody> </table> <p>Heterogeneity: <math>I^2 = 19\%</math>, <math>\tau^2 = 0.0068</math>, <math>p = 0.28</math></p> | Study        | TE          | seTE                | Hazard Ratio    | HR              | 95%-CI | Weight (common) | Weight (random) | 2021-09-16_to_2021-09-29 | -0.05 | 0.4266 |  | 0.95 | [0.41; 2.20] | 4.1% | 4.5% | 2021-09-30_to_2021-10-13 | -0.40 | 0.2968 |  | 0.67 | [0.38; 1.17] | 9.1%  | 9.6%  | 2021-10-14_to_2021-10-27 | 0.04  | 0.2191 |  | 1.04 | [0.68; 1.60] | 15.6% | 15.6% | 2021-10-28_to_2021-11-10 | -0.24 | 0.2208 |  | 0.79 | [0.51; 1.22] | 15.3% | 15.4% | 2021-11-11_to_2021-11-24 | -0.23 | 0.1955 |  | 0.79 | [0.54; 1.16] | 19.5% | 19.0% | 2021-11-25_to_2021-12-08 | -0.50 | 0.2133 |  | 0.61 | [0.40; 0.92] | 16.4% | 16.3% | 2021-12-09_to_2021-12-22 | -0.58 | 0.1967 |  | 0.56 | [0.38; 0.82] | 19.3% | 18.8% | 2021-12-23_to_2022-01-05 | -2.00 | 1.0311 |  | 0.13 | [0.02; 1.02] | 0.7% | 0.8% | <b>Common effect model</b> |  |  |  | <b>0.72</b> | <b>[0.61; 0.86]</b> | <b>100.0%</b> | <b>--</b> | <b>Random effects model</b> |  |  |  | <b>0.72</b> | <b>[0.60; 0.87]</b> | <b>--</b> | <b>100.0%</b> |
| Study                       | TE                                                                                        | seTE                                                                                                                                                                                                                                                                                                                                                                                                                                                                                                                                                                                                                                                                                                                                                                                                                                                                                                                                                                                                                                                                                                                                                                                                                                                                                                                                                                                                                                                                                                                                                                                                                                                                                                                                                                                                                                       | Hazard Ratio | HR          | 95%-CI              | Weight (common) | Weight (random) |        |                 |                 |                          |       |        |  |      |              |      |      |                          |       |        |  |      |              |       |       |                          |       |        |  |      |              |       |       |                          |       |        |  |      |              |       |       |                          |       |        |  |      |              |       |       |                          |       |        |  |      |              |       |       |                          |       |        |  |      |              |       |       |                          |       |        |  |      |              |      |      |                            |  |  |  |             |                     |               |           |                             |  |  |  |             |                     |           |               |
| 2021-09-16_to_2021-09-29    | -0.05                                                                                     | 0.4266                                                                                                                                                                                                                                                                                                                                                                                                                                                                                                                                                                                                                                                                                                                                                                                                                                                                                                                                                                                                                                                                                                                                                                                                                                                                                                                                                                                                                                                                                                                                                                                                                                                                                                                                                                                                                                     |              | 0.95        | [0.41; 2.20]        | 4.1%            | 4.5%            |        |                 |                 |                          |       |        |  |      |              |      |      |                          |       |        |  |      |              |       |       |                          |       |        |  |      |              |       |       |                          |       |        |  |      |              |       |       |                          |       |        |  |      |              |       |       |                          |       |        |  |      |              |       |       |                          |       |        |  |      |              |       |       |                          |       |        |  |      |              |      |      |                            |  |  |  |             |                     |               |           |                             |  |  |  |             |                     |           |               |
| 2021-09-30_to_2021-10-13    | -0.40                                                                                     | 0.2968                                                                                                                                                                                                                                                                                                                                                                                                                                                                                                                                                                                                                                                                                                                                                                                                                                                                                                                                                                                                                                                                                                                                                                                                                                                                                                                                                                                                                                                                                                                                                                                                                                                                                                                                                                                                                                     |              | 0.67        | [0.38; 1.17]        | 9.1%            | 9.6%            |        |                 |                 |                          |       |        |  |      |              |      |      |                          |       |        |  |      |              |       |       |                          |       |        |  |      |              |       |       |                          |       |        |  |      |              |       |       |                          |       |        |  |      |              |       |       |                          |       |        |  |      |              |       |       |                          |       |        |  |      |              |       |       |                          |       |        |  |      |              |      |      |                            |  |  |  |             |                     |               |           |                             |  |  |  |             |                     |           |               |
| 2021-10-14_to_2021-10-27    | 0.04                                                                                      | 0.2191                                                                                                                                                                                                                                                                                                                                                                                                                                                                                                                                                                                                                                                                                                                                                                                                                                                                                                                                                                                                                                                                                                                                                                                                                                                                                                                                                                                                                                                                                                                                                                                                                                                                                                                                                                                                                                     |              | 1.04        | [0.68; 1.60]        | 15.6%           | 15.6%           |        |                 |                 |                          |       |        |  |      |              |      |      |                          |       |        |  |      |              |       |       |                          |       |        |  |      |              |       |       |                          |       |        |  |      |              |       |       |                          |       |        |  |      |              |       |       |                          |       |        |  |      |              |       |       |                          |       |        |  |      |              |       |       |                          |       |        |  |      |              |      |      |                            |  |  |  |             |                     |               |           |                             |  |  |  |             |                     |           |               |
| 2021-10-28_to_2021-11-10    | -0.24                                                                                     | 0.2208                                                                                                                                                                                                                                                                                                                                                                                                                                                                                                                                                                                                                                                                                                                                                                                                                                                                                                                                                                                                                                                                                                                                                                                                                                                                                                                                                                                                                                                                                                                                                                                                                                                                                                                                                                                                                                     |              | 0.79        | [0.51; 1.22]        | 15.3%           | 15.4%           |        |                 |                 |                          |       |        |  |      |              |      |      |                          |       |        |  |      |              |       |       |                          |       |        |  |      |              |       |       |                          |       |        |  |      |              |       |       |                          |       |        |  |      |              |       |       |                          |       |        |  |      |              |       |       |                          |       |        |  |      |              |       |       |                          |       |        |  |      |              |      |      |                            |  |  |  |             |                     |               |           |                             |  |  |  |             |                     |           |               |
| 2021-11-11_to_2021-11-24    | -0.23                                                                                     | 0.1955                                                                                                                                                                                                                                                                                                                                                                                                                                                                                                                                                                                                                                                                                                                                                                                                                                                                                                                                                                                                                                                                                                                                                                                                                                                                                                                                                                                                                                                                                                                                                                                                                                                                                                                                                                                                                                     |              | 0.79        | [0.54; 1.16]        | 19.5%           | 19.0%           |        |                 |                 |                          |       |        |  |      |              |      |      |                          |       |        |  |      |              |       |       |                          |       |        |  |      |              |       |       |                          |       |        |  |      |              |       |       |                          |       |        |  |      |              |       |       |                          |       |        |  |      |              |       |       |                          |       |        |  |      |              |       |       |                          |       |        |  |      |              |      |      |                            |  |  |  |             |                     |               |           |                             |  |  |  |             |                     |           |               |
| 2021-11-25_to_2021-12-08    | -0.50                                                                                     | 0.2133                                                                                                                                                                                                                                                                                                                                                                                                                                                                                                                                                                                                                                                                                                                                                                                                                                                                                                                                                                                                                                                                                                                                                                                                                                                                                                                                                                                                                                                                                                                                                                                                                                                                                                                                                                                                                                     |              | 0.61        | [0.40; 0.92]        | 16.4%           | 16.3%           |        |                 |                 |                          |       |        |  |      |              |      |      |                          |       |        |  |      |              |       |       |                          |       |        |  |      |              |       |       |                          |       |        |  |      |              |       |       |                          |       |        |  |      |              |       |       |                          |       |        |  |      |              |       |       |                          |       |        |  |      |              |       |       |                          |       |        |  |      |              |      |      |                            |  |  |  |             |                     |               |           |                             |  |  |  |             |                     |           |               |
| 2021-12-09_to_2021-12-22    | -0.58                                                                                     | 0.1967                                                                                                                                                                                                                                                                                                                                                                                                                                                                                                                                                                                                                                                                                                                                                                                                                                                                                                                                                                                                                                                                                                                                                                                                                                                                                                                                                                                                                                                                                                                                                                                                                                                                                                                                                                                                                                     |              | 0.56        | [0.38; 0.82]        | 19.3%           | 18.8%           |        |                 |                 |                          |       |        |  |      |              |      |      |                          |       |        |  |      |              |       |       |                          |       |        |  |      |              |       |       |                          |       |        |  |      |              |       |       |                          |       |        |  |      |              |       |       |                          |       |        |  |      |              |       |       |                          |       |        |  |      |              |       |       |                          |       |        |  |      |              |      |      |                            |  |  |  |             |                     |               |           |                             |  |  |  |             |                     |           |               |
| 2021-12-23_to_2022-01-05    | -2.00                                                                                     | 1.0311                                                                                                                                                                                                                                                                                                                                                                                                                                                                                                                                                                                                                                                                                                                                                                                                                                                                                                                                                                                                                                                                                                                                                                                                                                                                                                                                                                                                                                                                                                                                                                                                                                                                                                                                                                                                                                     |              | 0.13        | [0.02; 1.02]        | 0.7%            | 0.8%            |        |                 |                 |                          |       |        |  |      |              |      |      |                          |       |        |  |      |              |       |       |                          |       |        |  |      |              |       |       |                          |       |        |  |      |              |       |       |                          |       |        |  |      |              |       |       |                          |       |        |  |      |              |       |       |                          |       |        |  |      |              |       |       |                          |       |        |  |      |              |      |      |                            |  |  |  |             |                     |               |           |                             |  |  |  |             |                     |           |               |
| <b>Common effect model</b>  |                                                                                           |                                                                                                                                                                                                                                                                                                                                                                                                                                                                                                                                                                                                                                                                                                                                                                                                                                                                                                                                                                                                                                                                                                                                                                                                                                                                                                                                                                                                                                                                                                                                                                                                                                                                                                                                                                                                                                            |              | <b>0.72</b> | <b>[0.61; 0.86]</b> | <b>100.0%</b>   | <b>--</b>       |        |                 |                 |                          |       |        |  |      |              |      |      |                          |       |        |  |      |              |       |       |                          |       |        |  |      |              |       |       |                          |       |        |  |      |              |       |       |                          |       |        |  |      |              |       |       |                          |       |        |  |      |              |       |       |                          |       |        |  |      |              |       |       |                          |       |        |  |      |              |      |      |                            |  |  |  |             |                     |               |           |                             |  |  |  |             |                     |           |               |
| <b>Random effects model</b> |                                                                                           |                                                                                                                                                                                                                                                                                                                                                                                                                                                                                                                                                                                                                                                                                                                                                                                                                                                                                                                                                                                                                                                                                                                                                                                                                                                                                                                                                                                                                                                                                                                                                                                                                                                                                                                                                                                                                                            |              | <b>0.72</b> | <b>[0.60; 0.87]</b> | <b>--</b>       | <b>100.0%</b>   |        |                 |                 |                          |       |        |  |      |              |      |      |                          |       |        |  |      |              |       |       |                          |       |        |  |      |              |       |       |                          |       |        |  |      |              |       |       |                          |       |        |  |      |              |       |       |                          |       |        |  |      |              |       |       |                          |       |        |  |      |              |       |       |                          |       |        |  |      |              |      |      |                            |  |  |  |             |                     |               |           |                             |  |  |  |             |                     |           |               |
| <p>Adjusted</p>             | <p>Vaccine type - Oxford AstraZeneca ChAdOx1 in reference to Pfizer BioNTech BNT162b2</p> | <table border="1"> <thead> <tr> <th>Study</th> <th>TE</th> <th>seTE</th> <th>Hazard Ratio</th> <th>HR</th> <th>95%-CI</th> <th>Weight (common)</th> <th>Weight (random)</th> </tr> </thead> <tbody> <tr><td>2021-09-16_to_2021-09-29</td><td>-0.27</td><td>0.3450</td><td></td><td>0.76</td><td>[0.39; 1.50]</td><td>2.8%</td><td>2.8%</td></tr> <tr><td>2021-09-30_to_2021-10-13</td><td>-0.03</td><td>0.1509</td><td></td><td>0.97</td><td>[0.72; 1.31]</td><td>14.5%</td><td>14.5%</td></tr> <tr><td>2021-10-14_to_2021-10-27</td><td>-0.15</td><td>0.1291</td><td></td><td>0.86</td><td>[0.67; 1.11]</td><td>19.8%</td><td>19.8%</td></tr> <tr><td>2021-10-28_to_2021-11-10</td><td>-0.07</td><td>0.1137</td><td></td><td>0.94</td><td>[0.75; 1.17]</td><td>25.6%</td><td>25.6%</td></tr> <tr><td>2021-11-11_to_2021-11-24</td><td>0.06</td><td>0.1365</td><td></td><td>1.06</td><td>[0.81; 1.38]</td><td>17.7%</td><td>17.7%</td></tr> <tr><td>2021-11-25_to_2021-12-08</td><td>0.16</td><td>0.2116</td><td></td><td>1.17</td><td>[0.78; 1.78]</td><td>7.4%</td><td>7.4%</td></tr> <tr><td>2021-12-09_to_2021-12-22</td><td>0.25</td><td>0.1706</td><td></td><td>1.29</td><td>[0.92; 1.80]</td><td>11.4%</td><td>11.4%</td></tr> <tr><td>2021-12-23_to_2022-01-05</td><td>0.22</td><td>0.6325</td><td></td><td>1.25</td><td>[0.36; 4.32]</td><td>0.8%</td><td>0.8%</td></tr> <tr><td><b>Common effect model</b></td><td></td><td></td><td></td><td><b>0.99</b></td><td><b>[0.89; 1.11]</b></td><td><b>100.0%</b></td><td><b>--</b></td></tr> <tr><td><b>Random effects model</b></td><td></td><td></td><td></td><td><b>0.99</b></td><td><b>[0.89; 1.11]</b></td><td><b>--</b></td><td><b>100.0%</b></td></tr> </tbody> </table> <p>Heterogeneity: <math>I^2 = 0\%</math>, <math>\tau^2 = 0</math>, <math>p = 0.61</math></p>          | Study        | TE          | seTE                | Hazard Ratio    | HR              | 95%-CI | Weight (common) | Weight (random) | 2021-09-16_to_2021-09-29 | -0.27 | 0.3450 |  | 0.76 | [0.39; 1.50] | 2.8% | 2.8% | 2021-09-30_to_2021-10-13 | -0.03 | 0.1509 |  | 0.97 | [0.72; 1.31] | 14.5% | 14.5% | 2021-10-14_to_2021-10-27 | -0.15 | 0.1291 |  | 0.86 | [0.67; 1.11] | 19.8% | 19.8% | 2021-10-28_to_2021-11-10 | -0.07 | 0.1137 |  | 0.94 | [0.75; 1.17] | 25.6% | 25.6% | 2021-11-11_to_2021-11-24 | 0.06  | 0.1365 |  | 1.06 | [0.81; 1.38] | 17.7% | 17.7% | 2021-11-25_to_2021-12-08 | 0.16  | 0.2116 |  | 1.17 | [0.78; 1.78] | 7.4%  | 7.4%  | 2021-12-09_to_2021-12-22 | 0.25  | 0.1706 |  | 1.29 | [0.92; 1.80] | 11.4% | 11.4% | 2021-12-23_to_2022-01-05 | 0.22  | 0.6325 |  | 1.25 | [0.36; 4.32] | 0.8% | 0.8% | <b>Common effect model</b> |  |  |  | <b>0.99</b> | <b>[0.89; 1.11]</b> | <b>100.0%</b> | <b>--</b> | <b>Random effects model</b> |  |  |  | <b>0.99</b> | <b>[0.89; 1.11]</b> | <b>--</b> | <b>100.0%</b> |
| Study                       | TE                                                                                        | seTE                                                                                                                                                                                                                                                                                                                                                                                                                                                                                                                                                                                                                                                                                                                                                                                                                                                                                                                                                                                                                                                                                                                                                                                                                                                                                                                                                                                                                                                                                                                                                                                                                                                                                                                                                                                                                                       | Hazard Ratio | HR          | 95%-CI              | Weight (common) | Weight (random) |        |                 |                 |                          |       |        |  |      |              |      |      |                          |       |        |  |      |              |       |       |                          |       |        |  |      |              |       |       |                          |       |        |  |      |              |       |       |                          |       |        |  |      |              |       |       |                          |       |        |  |      |              |       |       |                          |       |        |  |      |              |       |       |                          |       |        |  |      |              |      |      |                            |  |  |  |             |                     |               |           |                             |  |  |  |             |                     |           |               |
| 2021-09-16_to_2021-09-29    | -0.27                                                                                     | 0.3450                                                                                                                                                                                                                                                                                                                                                                                                                                                                                                                                                                                                                                                                                                                                                                                                                                                                                                                                                                                                                                                                                                                                                                                                                                                                                                                                                                                                                                                                                                                                                                                                                                                                                                                                                                                                                                     |              | 0.76        | [0.39; 1.50]        | 2.8%            | 2.8%            |        |                 |                 |                          |       |        |  |      |              |      |      |                          |       |        |  |      |              |       |       |                          |       |        |  |      |              |       |       |                          |       |        |  |      |              |       |       |                          |       |        |  |      |              |       |       |                          |       |        |  |      |              |       |       |                          |       |        |  |      |              |       |       |                          |       |        |  |      |              |      |      |                            |  |  |  |             |                     |               |           |                             |  |  |  |             |                     |           |               |
| 2021-09-30_to_2021-10-13    | -0.03                                                                                     | 0.1509                                                                                                                                                                                                                                                                                                                                                                                                                                                                                                                                                                                                                                                                                                                                                                                                                                                                                                                                                                                                                                                                                                                                                                                                                                                                                                                                                                                                                                                                                                                                                                                                                                                                                                                                                                                                                                     |              | 0.97        | [0.72; 1.31]        | 14.5%           | 14.5%           |        |                 |                 |                          |       |        |  |      |              |      |      |                          |       |        |  |      |              |       |       |                          |       |        |  |      |              |       |       |                          |       |        |  |      |              |       |       |                          |       |        |  |      |              |       |       |                          |       |        |  |      |              |       |       |                          |       |        |  |      |              |       |       |                          |       |        |  |      |              |      |      |                            |  |  |  |             |                     |               |           |                             |  |  |  |             |                     |           |               |
| 2021-10-14_to_2021-10-27    | -0.15                                                                                     | 0.1291                                                                                                                                                                                                                                                                                                                                                                                                                                                                                                                                                                                                                                                                                                                                                                                                                                                                                                                                                                                                                                                                                                                                                                                                                                                                                                                                                                                                                                                                                                                                                                                                                                                                                                                                                                                                                                     |              | 0.86        | [0.67; 1.11]        | 19.8%           | 19.8%           |        |                 |                 |                          |       |        |  |      |              |      |      |                          |       |        |  |      |              |       |       |                          |       |        |  |      |              |       |       |                          |       |        |  |      |              |       |       |                          |       |        |  |      |              |       |       |                          |       |        |  |      |              |       |       |                          |       |        |  |      |              |       |       |                          |       |        |  |      |              |      |      |                            |  |  |  |             |                     |               |           |                             |  |  |  |             |                     |           |               |
| 2021-10-28_to_2021-11-10    | -0.07                                                                                     | 0.1137                                                                                                                                                                                                                                                                                                                                                                                                                                                                                                                                                                                                                                                                                                                                                                                                                                                                                                                                                                                                                                                                                                                                                                                                                                                                                                                                                                                                                                                                                                                                                                                                                                                                                                                                                                                                                                     |              | 0.94        | [0.75; 1.17]        | 25.6%           | 25.6%           |        |                 |                 |                          |       |        |  |      |              |      |      |                          |       |        |  |      |              |       |       |                          |       |        |  |      |              |       |       |                          |       |        |  |      |              |       |       |                          |       |        |  |      |              |       |       |                          |       |        |  |      |              |       |       |                          |       |        |  |      |              |       |       |                          |       |        |  |      |              |      |      |                            |  |  |  |             |                     |               |           |                             |  |  |  |             |                     |           |               |
| 2021-11-11_to_2021-11-24    | 0.06                                                                                      | 0.1365                                                                                                                                                                                                                                                                                                                                                                                                                                                                                                                                                                                                                                                                                                                                                                                                                                                                                                                                                                                                                                                                                                                                                                                                                                                                                                                                                                                                                                                                                                                                                                                                                                                                                                                                                                                                                                     |              | 1.06        | [0.81; 1.38]        | 17.7%           | 17.7%           |        |                 |                 |                          |       |        |  |      |              |      |      |                          |       |        |  |      |              |       |       |                          |       |        |  |      |              |       |       |                          |       |        |  |      |              |       |       |                          |       |        |  |      |              |       |       |                          |       |        |  |      |              |       |       |                          |       |        |  |      |              |       |       |                          |       |        |  |      |              |      |      |                            |  |  |  |             |                     |               |           |                             |  |  |  |             |                     |           |               |
| 2021-11-25_to_2021-12-08    | 0.16                                                                                      | 0.2116                                                                                                                                                                                                                                                                                                                                                                                                                                                                                                                                                                                                                                                                                                                                                                                                                                                                                                                                                                                                                                                                                                                                                                                                                                                                                                                                                                                                                                                                                                                                                                                                                                                                                                                                                                                                                                     |              | 1.17        | [0.78; 1.78]        | 7.4%            | 7.4%            |        |                 |                 |                          |       |        |  |      |              |      |      |                          |       |        |  |      |              |       |       |                          |       |        |  |      |              |       |       |                          |       |        |  |      |              |       |       |                          |       |        |  |      |              |       |       |                          |       |        |  |      |              |       |       |                          |       |        |  |      |              |       |       |                          |       |        |  |      |              |      |      |                            |  |  |  |             |                     |               |           |                             |  |  |  |             |                     |           |               |
| 2021-12-09_to_2021-12-22    | 0.25                                                                                      | 0.1706                                                                                                                                                                                                                                                                                                                                                                                                                                                                                                                                                                                                                                                                                                                                                                                                                                                                                                                                                                                                                                                                                                                                                                                                                                                                                                                                                                                                                                                                                                                                                                                                                                                                                                                                                                                                                                     |              | 1.29        | [0.92; 1.80]        | 11.4%           | 11.4%           |        |                 |                 |                          |       |        |  |      |              |      |      |                          |       |        |  |      |              |       |       |                          |       |        |  |      |              |       |       |                          |       |        |  |      |              |       |       |                          |       |        |  |      |              |       |       |                          |       |        |  |      |              |       |       |                          |       |        |  |      |              |       |       |                          |       |        |  |      |              |      |      |                            |  |  |  |             |                     |               |           |                             |  |  |  |             |                     |           |               |
| 2021-12-23_to_2022-01-05    | 0.22                                                                                      | 0.6325                                                                                                                                                                                                                                                                                                                                                                                                                                                                                                                                                                                                                                                                                                                                                                                                                                                                                                                                                                                                                                                                                                                                                                                                                                                                                                                                                                                                                                                                                                                                                                                                                                                                                                                                                                                                                                     |              | 1.25        | [0.36; 4.32]        | 0.8%            | 0.8%            |        |                 |                 |                          |       |        |  |      |              |      |      |                          |       |        |  |      |              |       |       |                          |       |        |  |      |              |       |       |                          |       |        |  |      |              |       |       |                          |       |        |  |      |              |       |       |                          |       |        |  |      |              |       |       |                          |       |        |  |      |              |       |       |                          |       |        |  |      |              |      |      |                            |  |  |  |             |                     |               |           |                             |  |  |  |             |                     |           |               |
| <b>Common effect model</b>  |                                                                                           |                                                                                                                                                                                                                                                                                                                                                                                                                                                                                                                                                                                                                                                                                                                                                                                                                                                                                                                                                                                                                                                                                                                                                                                                                                                                                                                                                                                                                                                                                                                                                                                                                                                                                                                                                                                                                                            |              | <b>0.99</b> | <b>[0.89; 1.11]</b> | <b>100.0%</b>   | <b>--</b>       |        |                 |                 |                          |       |        |  |      |              |      |      |                          |       |        |  |      |              |       |       |                          |       |        |  |      |              |       |       |                          |       |        |  |      |              |       |       |                          |       |        |  |      |              |       |       |                          |       |        |  |      |              |       |       |                          |       |        |  |      |              |       |       |                          |       |        |  |      |              |      |      |                            |  |  |  |             |                     |               |           |                             |  |  |  |             |                     |           |               |
| <b>Random effects model</b> |                                                                                           |                                                                                                                                                                                                                                                                                                                                                                                                                                                                                                                                                                                                                                                                                                                                                                                                                                                                                                                                                                                                                                                                                                                                                                                                                                                                                                                                                                                                                                                                                                                                                                                                                                                                                                                                                                                                                                            |              | <b>0.99</b> | <b>[0.89; 1.11]</b> | <b>--</b>       | <b>100.0%</b>   |        |                 |                 |                          |       |        |  |      |              |      |      |                          |       |        |  |      |              |       |       |                          |       |        |  |      |              |       |       |                          |       |        |  |      |              |       |       |                          |       |        |  |      |              |       |       |                          |       |        |  |      |              |       |       |                          |       |        |  |      |              |       |       |                          |       |        |  |      |              |      |      |                            |  |  |  |             |                     |               |           |                             |  |  |  |             |                     |           |               |

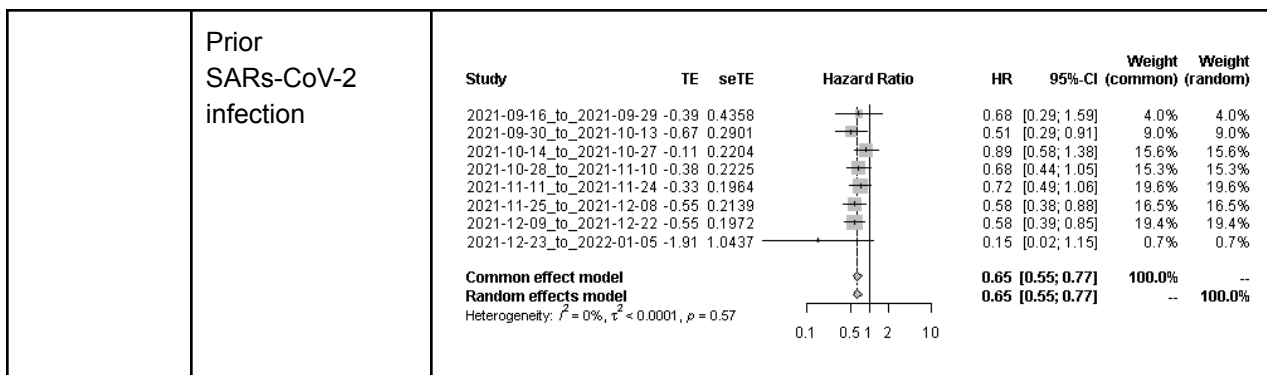

Source: http://medrxiv.org/content/10.1101/2022.02.04.22270479v1.full.pdf
